1

2

3

4 **The land-use dynamics of potato agrobiodiversity in the highlands of central Peru: a**  
5 **case study of spatial-temporal management across farming landscapes**

6

7

8 Alejandra Arce<sup>1\*,#a</sup>, Stef de Haan<sup>2,4</sup>, Henry Juarez<sup>2</sup>, Franklin Plasencia<sup>2</sup>, Dharani Burra<sup>4</sup>,  
9 Raul Ccanto<sup>3</sup>, Severin Polreich<sup>2</sup>, Maria Scurrah<sup>3</sup>

10

11

12

13 <sup>1</sup> Department of Agricultural Sciences, University of Antioquia, Medellín, Colombia

14

15 <sup>2</sup> Global Program Genetic Resources, International Potato Center (CIP), La Molina, Lima,  
16 Peru

17

18 <sup>3</sup> Grupo Yanapai, Concepción, Junín, Peru

19

20 <sup>4</sup> Agricultural Genetics Institute, International Center for Tropical Agriculture (CIAT), Tu  
21 Liem, Hanoi, Vietnam

22

23 <sup>#a</sup> Calle Nicolo Paganini 140, San Borja, Lima, Peru

24

25 \* Corresponding author

26 Email: [alearcei@gmail.com](mailto:alearcei@gmail.com)

27

## 28 **Abstract**

29 In the high Andes, environmental and socio-economic drivers are transforming land use and  
30 presumably affecting the *in situ* conservation of potato (*Solanum* spp.). To monitor the use  
31 and conservation of intraspecific diversity, systematic and comparative studies across land-  
32 use systems are needed. We investigated the spatial-temporal dynamics of potato in two  
33 contrasting landscapes of Peru's central Andes: a highland plateau (Huancavelica) vs. an  
34 eastern slope (Pasco). We examined household-level areal allocations, altitudinal  
35 distribution, sectoral fallowing practices, and the conservation status for three main cultivar  
36 groups: (i) bred varieties, (ii) floury landraces, and (iii) bitter landraces. Mixed methods were  
37 used to survey 323 households and the 1,101 potato fields they managed in 2012–2013. We  
38 compared the contemporary altitudinal distribution of landraces with 1975–1985 altimeter  
39 genebank data from the International Potato Center. We show that intensification occurs in  
40 each landscape through adaptations of traditional management practices while maintaining  
41 high intraspecific diversity. Access to land and production end use (sale vs. consumption)  
42 significantly affected smallholder management and differentiated the landscapes. Total areas  
43 in Huancavelica and Pasco were allocated to 82.9% vs. 74.2% floury landraces, 9.2% vs.  
44 25.7% bred varieties, and 7.9% vs. 0.1% bitter landraces. In market-oriented Pasco, fields in  
45 sectoral fallows between 3,901 m and 4,116 m above sea level consistently contained the  
46 highest levels of landrace diversity. The bulk of diversity in subsistence-oriented  
47 Huancavelica occurred between 3,909 m and 4,324 m outside sectoral fallows. Most of the  
48 unique landraces documented were scarce across households: 45.4% and 61.7% respectively  
49 in Huancavelica and Pasco. Bred varieties showed the widest (1,100 m) and bitter landraces  
50 the narrowest (400 m) altitudinal distributions. Potato cultivation has moved upward by an

51 average of 306 m since 1975. Landrace diversity is versatile but unevenly distributed across  
52 landscapes. This requires adaptive ways to incentivize *in situ* conservation.

53 **Keywords:** Land use · Potato · Intraspecific diversity · Smallholder farmers · Andes · Peru

## 54 **1. Introduction**

55 In the Andes, demographic shifts, migration, part-time farming, market integration,  
56 urbanization and climate change will increasingly affect the land-use systems that support  
57 farmers' on-farm agrobiodiversity and the *in situ* conservation of major food plants [1–7].

58 Land-use responses in the Andes to the above-mentioned drivers have been varied. In some  
59 farming environments, the intensity of land use has increased in terms of cropping  
60 frequencies and areal coverage of cash crops or bred varieties, fertilizers and pesticides  
61 driven by agricultural specialization [8–11]. Other areas have seen a mixed trend due to  
62 migration, off-farm work, land abandonment, and a livelihood shift away from subsistence  
63 agriculture [12–15]. At high altitude, the expansion of agriculture resulting from climate  
64 change and market incentives is seen to encroach upon natural habitats, disrupting ecosystem  
65 services such as the provision of soil organic carbon stocks and water, and competing with  
66 other smallholder livelihood activities [16–18]. The net outcome of these processes on  
67 farmers' management practices involving agrobiodiversity –particularly crop landrace  
68 diversity– has not been necessarily negative, as smallholder farming systems have been  
69 shown to be highly adaptive and opportunistic [19–21]. Therefore, Andean smallholder  
70 farming systems are still recognized to harbor high levels of agrobiodiversity essential for  
71 adaptive agriculture and food security [22–24].

72 Modern-day environmental, demographic, and socio-economic changes are nonetheless  
73 demanding ever more complex land-use choices from smallholder farmers. Processes of

74 intensification reflect hybrid systems where traditional management schemes coexist with  
75 management modifications [25–28]. Contemporary agricultural land-use change in the high  
76 Andes is often associated with an upward expansion of cropping, micro-fragmentation of  
77 household cropping areas, incremental occurrence of pests and disease at higher altitudes,  
78 and the gradual abandonment of communal land-use management such as sectoral fallowing  
79 systems [6,29–31]. Mixed livestock–crop systems, and competition between these two  
80 components, are particularly common at high altitudes [17,32]. Nonetheless, it is difficult to  
81 make generalizations about many of these processes in the region due to its socioeconomic  
82 and agroecological diversity [33,34]. The co-existence of traditional and modern  
83 management practices is not uncommon as smallholders adjust their livelihoods by  
84 integrating into markets and adopting new technologies [10,19,35,36].

85 The persistence of high crop and landrace diversity in the portfolios of smallholder farmers  
86 has been considered a unique feature of Andean agriculture despite accelerated change,  
87 although in-depth inquiries into the relationship of land-use change and intraspecific  
88 diversity of crops are scant. In the central Peruvian highlands, potato agriculture has evolved  
89 in a harsh and risk-prone mountain environment. Its diverse microclimates, altitudinal  
90 gradients and soil conditions have led to spatially heterogeneous farming landscapes and a  
91 suite of management adaptations involving different tillage systems and field scattering,  
92 among other practices [37–39]. Extreme and typically localized weather events like frost and  
93 hail regularly result in crop failure [40]. Pest and disease outbreaks are also known to  
94 occasionally affect these high-altitude farming environments [41,42]. To mitigate imminent  
95 risk and safeguard their food reserves and seed stocks, farmers have developed practices that  
96 juxtapose spatial and temporal features of land use at household and communal levels.

97 An example involves the sectoral fallowing system, or *laymi* in Quechua, as it aggregates  
98 households' individually assigned fields into six to 10 sectors and is collectively cultivated  
99 following a crop–pasture rotation regimen [43–45]. Sectoral fallowing systems allow fragile  
100 high-altitude soils to partially recover their fertility while making pastureland available for  
101 grazing animals [46]. They also optimize labor through community-level coordination  
102 [47,48]. Yet another example involves distinct types of tillage systems for potato cultivation  
103 [38]. *Chiwa* is a low-labor-intensity minimal-tillage practice and is commonly applied in  
104 sloping environments reserved for landraces. *Chacmeo* is another minimum-tillage practice  
105 that is moderately labor-intensive and well adapted to slope planting of landraces. *Barbecho*  
106 is a full-tillage practice and labor-intensive. It is commonly used for market-oriented  
107 production of bred varieties and commercial landraces.

108 Adaptive land-use practices have thus enabled smallholder farmers in Peru's central Andes  
109 to manage high intraspecific diversity of the potato. Four botanical species of cultivated  
110 potato are recognized following the latest taxonomic treatment: *Solanum tuberosum*,  
111 *Solanum curtilobum*, *Solanum ajanhuiri*, and *Solanum juzepczukii* [49,50]. At the  
112 intraspecific level farmers maintain an ample repertoire of genetically and morphologically  
113 distinct, farmer-recognized landraces. These landraces –each with a farmer-recognized  
114 vernacular name– are the basic unit of management and conservation on the farm [51,52].  
115 At the national level this intraspecific diversity is high and consists of an estimated 2,800 to  
116 3,300 potato landraces [53]. Even at the village and household levels, landrace diversity can  
117 be remarkable. For example, in one hotspot of potato diversity, up to 406 genetically distinct  
118 landraces have been identified in the landrace portfolios of just eight farmer households, and  
119 individual households are known to maintain as many as 160 unique landraces [54].

120 Farmers predominantly classify cultivar groups, varieties or landraces according to visual  
121 phenotypic characters [55,56]. Three main cultivar groups are recognized by smallholder  
122 farmers in Peru's central highlands. The floury landraces (*S. tuberosum* Andigenum Group),  
123 also known as “boiling potatoes”, are deemed of high culinary quality and make up the bulk  
124 of the potato landrace diversity managed by farmers. They are most often cultivated as mixed  
125 lots (*chalo*, *chaqru* or *waychuy* in Quechua) containing between four and 80 floury landraces  
126 while a minority (i.e. eight landraces) are commercially produced in single-cultivar fields  
127 [57]. Bitter landraces (*S. juzepczukii* and *S. curtilobum*) are generally frost-resistant and only  
128 apt to be consumed as freeze-dried *chuño* due to their high glycoalkaloid content [40,58].  
129 They are also less diverse in number compared to floury landraces. Bred varieties (*S.*  
130 *tuberosum*) are the result of formal breeding programs and have been amply disseminated  
131 for their high-yield and disease-resistance traits in Peru. Farmers have widely integrated these  
132 into their cropping portfolios. Bred varieties occupy a special window in terms of food supply  
133 as they produce earlier than the floury landraces. They serve a dual purpose: consumption  
134 and the market.

135 Research concerning the contemporary spatial management of Andean smallholders'  
136 agrobiodiversity, and specifically the interaction between land use and intraspecific diversity,  
137 can help to gain insights into multilevel conservation within and among landscapes,  
138 households and fields. In this in-depth case study, we scrutinize the land-use dynamics of the  
139 potato in two distinct diversity hotspots in Peru's central Andes. We examine and compare  
140 areal allocations, altitudinal ranges, fallowing rates, the use of sectoral fallowing, and the  
141 conservation status of individual landraces. To detect possible temporal changes in the  
142 distribution of landraces, we compare the contemporary altitudinal range with 1975–1985

143 elevation records of accessions from the International Potato Center (CIP). We hypothesize  
144 that the spatial-temporal dynamics characterizing each landscape in the central Peruvian  
145 highlands is driven by context-specific pressures that require smallholders' differential  
146 management adjustments while allowing the maintenance of high intraspecific diversity.  
147 Implications for the long-term *in situ* conservation tied to land use are reflected upon.

## 148 **2. Materials and methods**

### 149 **2.1. Study area and household sample**

150 We conducted in-depth research in five communities pertaining to two contrasting highland  
151 landscapes of Peru's central Andes (Fig 1; Table 1). The first cluster of three farmer  
152 communities lies in the central plateau or cordillera of the Huancavelica region where potato  
153 is grown at high altitude with frequent exposure to frost and hail. The second cluster of two  
154 communities is nestled in a valley along the eastern flanks of the Andes in the Pasco region,  
155 about 235 kilometers from the Huancavelica region. Here relatively humid conditions lead  
156 to high levels of pressure from late blight disease (*Phytophthora infestans*). Farmers in  
157 Huancavelica are indigenous Quechua speakers, while those in Pasco are mostly mestizo  
158 Spanish speakers. Both sites are recognized hotspots of potato intraspecific diversity [59,60].  
159 A total of 176 and 147 households in the Huancavelica and Pasco landscapes, respectively,  
160 were randomly sampled and participated in the study.

### 161 **Fig 1. Study sites in Peru's central Andes.**

### 162 **Table 1. Study sites in Peru's central Andes.**

| Site | Site location                      | Districts      | Communities                       | Number of total households† | Number of sampled households |
|------|------------------------------------|----------------|-----------------------------------|-----------------------------|------------------------------|
| 1    | Huancavelica region, central Andes | Yauli, Paucará | Castillapata, Huachhua, Pumaranra | 750-800                     | 176                          |

|   |                                |                                       |         |     |
|---|--------------------------------|---------------------------------------|---------|-----|
| 2 | Pasco region,<br>central Andes | Paucartambo<br>Bellavista,<br>Chupaca | 550-600 | 147 |
|---|--------------------------------|---------------------------------------|---------|-----|

163 †Estimates derived in consultation with community authorities.

## 164 **2.2. Participatory mapping and field-level sampling**

165 Drawing from cartography and participatory methods we conducted participatory mapping  
166 (pGIS) between February and June 2013 to document the land use of each potato field of  
167 participating households. The procedure consisted of two parts. First, we accompanied  
168 farmers on one or two visits to each of their potato fields for short surveys, georeferencing,  
169 and field sampling of cultivars planted. Second, we ran multiple focus-group meetings  
170 centered on drawing over printed high-resolution satellite images of each of the five  
171 communities. Participating households located and drew each of their potato fields on the  
172 base map. Local authorities delimited community boundaries and identified each of the  
173 sectors comprising following systems.

174 Field-level surveys were conducted with each household (n=323). Trained enumerators  
175 implemented the surveys in Quechua (Huancavelica) and Spanish (Pasco). Each survey had  
176 four components: (i) basic household-level information, (ii) field-level characteristics of each  
177 potato field, (iii) georeferencing each potato field with Garmin Oregon 550t global  
178 positioning systems (GPS) devices, and (iv) cultivar diversity sampling at harvest. For each  
179 georeferenced field a range of variables was collected, including planting date, fallowing-  
180 sector association, tillage type, use of chemicals, slope, seed source, and product end use.  
181 Georeferencing resulted in the collection of waypoints for the corners and center of each  
182 field, as well as altitude. Farmers also recalled crop species content and fallows for each year  
183 from 2004 to 2013. A total of 1,101 potato fields, 481 in Huancavelica and 620 in Pasco,  
184 were visited, surveyed and georeferenced.



185 During the potato harvest from April to June 2013, each potato field (n=1,101) was sampled  
186 for its cultivars. In each field, we randomly selected 25 potato plants that were distributed  
187 along eight equidistant rows and unearthed one tuber per plant until we arrived at a total  
188 count of 200 tubers. In cases where the household had already harvested, we randomly picked  
189 200 tubers from the heap or bags. The sampled tubers served to identify and count each of  
190 the individual cultivars following the local nomenclature used by farmers. This exercise was  
191 carried out by local survey teams and the farmers to whom each field belonged. In each field,  
192 the occurrence of a potato cultivar was recorded as the total count of individual tubers out of  
193 200 total tubers sampled.

### 194 **2.3. Focus-group meetings to refine cultivar classification**

195 Individual cultivars are frequently recognized by more than one name (synonyms), and  
196 sometimes the same name is used for distinct cultivars (homonyms). This poses a challenge  
197 of over- or under-classification [51]. To overcome this issue, we carried out focus group  
198 meetings with farmers who were the most knowledgeable about varietal diversity. A  
199 representative collection of the distinct cultivar morphotypes that were identified during field  
200 surveys was created for each community by using real tuber samples and, in a few cases,  
201 photographs. Local experts, both men and women, indicated alternate names associated with  
202 each tuber sample. A list of unique cultivars and their synonyms was thus derived for each  
203 community. These, in turn, were compared and cross-checked for the same tuber samples for  
204 each landscape. A master list of unique cultivars was attained for each of the two landscapes.

### 205 **2.4. Conservation status of cultivars**

206 To determine the conservation status of cultivars for each landscape (Huancavelica, Pasco)  
207 we used two indices (59): (i) relative cultivar frequency (RCF), (ii) overall cultivar frequency  
208 (OCF). The RCF index is used to gauge the relative abundance or frequency (or rarity) of a

209 unique cultivar in comparison to all other cultivars sampled in each landscape It indicates the  
210 proportion of each distinct cultivar over the total cultivar population sampled in each  
211 landscape. For each cultivar occurrence per household, a household cultivar frequency (HCF)  
212 was first calculated. This involved summing the number of tubers sampled for a specific  
213 cultivar across a household's total fields, dividing the result by the total number of samples  
214 of all cultivars for that household, and multiplying by 100%. The RCF for each cultivar was  
215 then derived by summing its corresponding HCFs and dividing the result by the total number  
216 of households sampled per landscape. Red listing was based on the threshold levels:  
217  $RCF < 0.05$ =very scarce,  $RCF < 0.10$ =scarce,  $RCF < 0.25$ =uncommon,  $RCF < 1.00$ =common,  
218  $RCF > 1.00$ =abundant.

219 The OCF index is a measure of evenness. For each cultivar, its community cultivar frequency  
220 (CCF) was first calculated by dividing the number of households cultivating it by the total  
221 number of sampled households in each community comprising a landscape and multiplying  
222 by 100%. The OCF for each cultivar was obtained by summing its CCFs and dividing the  
223 result by the total number of communities sampled in the landscape. The evenness of  
224 individual cultivars was then classified as the proportion of households growing them:  
225  $OCF < 1\%$ =very few households,  $OCF < 5\%$ =few households,  $OCF < 25\%$ =many households,  
226  $OCF > 25\%$ =most households.

## 227 **2.5. Timeline series analysis**

228 Possible changes in the altitudinal distributions of floury and bitter landraces were examined.  
229 We compared the altitudes documented in this study with genebank passport altimeter data  
230 from all collections made in 1975–1985 for the same two landscapes. The latter data were

231 provided by the International Potato Center and totaled 63 georeferenced landrace accessions  
232 from 16 locations in Huancavelica and Pasco.

## 233 **2.6. Statistical analyses**

234 Descriptive statistical analyses were performed using the statistical computing software R  
235 version 3.4.1 [61]. Household averages for number of potato cultivars, number of fields, and  
236 cropping areas were calculated by cultivar group (bred varieties, floury landraces, bitter  
237 landraces) and landscape. For each landscape, we calculated the potato cropping area by  
238 cultivar group and altitudinal distribution range in total number of hectares. We examined  
239 the number of fields, the number of cultivars per field, and fallowing rates per field by cultivar  
240 group for each landscape. Fallowing rates were obtained by dividing the number of unplowed  
241 (fallow) years by the total number of years included in the cropping cycle. We analyzed  
242 changes in the altitudinal distribution of floury and bitter landraces from 1975 to 2013 by  
243 calculating their average, maximum, minimum, and standard deviation values. To detect  
244 significant differences in the number of cultivars, areas, and altitudes between fields  
245 associated with a fallowing sector and not associated with a sector within landscapes we  
246 performed two-sample unpaired Wilcoxon tests. Significance was determined at the  $p < 0.001$   
247 level. To identify salient distinctions in farmers' field management practices between  
248 landscapes, fields were classified as low, intermediate, or high-range, based on their altitude.  
249 The altitudinal range for low was 3,097-3,499 m, for intermediate 3,500-3,899 m, and for  
250 high 3,900-4,324 m. This classification resulted in 97 intermediate-range and 382 high-range  
251 fields in Huancavelica, and 379 intermediate-range and 207 high-range fields in Pasco. For  
252 each high and intermediate range, several regression and statistical learning approaches were  
253 compared, and the best-performing model (details below) was used to identify management  
254 characteristics that significantly differentiated fields across landscapes. This analysis was not

255 carried out for low-range fields as they were too few (two in Huancavelica and 34 in Pasco)  
256 to compare between landscapes. Models using logistic regression, generalized linear models  
257 (using lasso, elastic and ridge-based penalized maximum likelihood approaches) and random  
258 forest-based approaches were built using field-level management practices data (i.e. cultivar  
259 group content, number of cultivars, field area, days to harvest, planting season, sector  
260 association, seed source, product end use, tillage type, application (yes/no) of chemicals, and  
261 fallowing rate) collected for each field surveyed as explanatory variables, and landscapes as  
262 the outcome variable.

263 Receiver operating characteristic (ROC), sensitivity and specificity metrics with ten-fold  
264 cross validation were used to assess model quality. The coefficient of variation metric was  
265 used to identify the lowest lambda value for lasso and ridge-based penalized general linear  
266 models. To account for imbalance in the number of intermediate-range fields (97 in  
267 Huancavelica and 379 in Pasco), up and down sampling approaches were employed to build  
268 the models. The generalized linear model with elastic-based penalization approach was found  
269 to perform best in classifying intermediate-range fields and the generalized linear model with  
270 ridge-based penalization approach performed best in classifying high-range fields across  
271 landscapes. The above analysis was performed in the R statistical computing environment  
272 using the packages glmnet caret and catools [62]. The outputs of the models were visualized  
273 through boxplots drawn with the ggplot2 package, and association plots (based on an  
274 independence model and Pearson test of the residuals) were drawn using the vcd package in  
275 the R statistical computing environment [61,63,64].

276 Logistic regression was performed to identify significantly different household-level  
277 characteristics between landscapes. The variables age and sex of the household head, number

278 of children and adults in the household, total number of potato fields for the household, off-  
279 farm income (yes/no), total number of bred varieties, floury landraces and bitter landraces  
280 across all fields belonging to the household, and average household area under bred, floury,  
281 and bitter cultivation were used as explanatory variables, with landscapes serving as the  
282 outcome variable. Stepwise regression (forward and backward) was employed, and the  
283 resulting model was selected based on Akaike information criterion (AIC) and likelihood  
284 ratio test (LRT) criteria. Statistical analysis of field-level cropping history and land-use  
285 patterns (2004–2013) was performed using R package TraMineR to elucidate differences  
286 between landscapes at each altitudinal range (intermediate and high) separately [65].

## 287 **2.7. Research ethics**

288 The study was conducted in accordance with the Declaration of Helsinki and the guidelines  
289 provided by the Central Committee on Research Ethics at the University of Antioquia,  
290 Medellín. Ethics approval was not required for this research according to national regulations  
291 as it involved human subjects in non-invasive survey procedures. We sought and obtained  
292 the approval of community authorities prior to survey implementation. We described the  
293 objectives of the study, the methodology, the oral prior informed consent option, voluntary  
294 nature and confidentiality of households participating during a community assembly.  
295 Community authorities from the five communities selected agreed to the study. Households  
296 were surveyed only after community-level approval.

## 297 **3. Results**

### 298 **3.1. Household characteristics**

299 We calculated and compared main household features across landscapes (Table 2). These  
300 indicated demographic and socio-economic distinctions, such as in the average number of  
301 children per household, the proportion of heads of household without formal schooling, and

302 family vs. hired labor to sustain agricultural activities on the farm. The most significant  
 303 differences between households in Huancavelica and Pasco as detected by logistic regression  
 304 analyses (best model) were number of children, number of fields, off-farm income, number  
 305 of flourey landraces, and average area cultivated with bred varieties (Table 3).

306 **Table 2. Main household-level characteristics by landscape.**

| <b>Demography</b>                                               | <b>Huancavelica (n†=176)</b> | <b>Pasco (n†=147)</b> |
|-----------------------------------------------------------------|------------------------------|-----------------------|
| Average age of head of household (years)                        | 47.7 (±15.0)                 | 44.3 (±14.3)          |
| Female heads of household (%)                                   | 10.0                         | 8.0                   |
| Average number of children (<18 years) per household            | 2.4 (±2.0)                   | 1.4 (±1.2)            |
| Average number of total household members per household         | 4.7 (±2.3)                   | 3.8 (±1.5)            |
| <b>Education</b>                                                |                              |                       |
| Heads of household who completed primary education (%)          | 8.0                          | 23.1                  |
| Heads of household who did not complete primary education (%)   | 31.2                         | 31.9                  |
| Heads of household who completed secondary education (%)        | 19.9                         | 13.6                  |
| Heads of household who did not complete secondary education     | 12.5                         | 25.2                  |
| Heads of household who attended technical school or college (%) | 4.0                          | 1.4                   |
| Heads of household who did not have any formal schooling (%)    | 24.4                         | 4.8                   |
| <b>Sources of farm labor</b>                                    |                              |                       |
| Family only (%)                                                 | 46.6                         | 23.1                  |
| Family and reciprocity (%)                                      | 35.8                         | 23.8                  |
| Family and hired labor (%)                                      | 3.4                          | 35.4                  |
| Reciprocity and communal work (%)                               | 6.3                          | 9.5                   |
| Family, hired and reciprocity (%)                               | 3.4                          | 2.7                   |
| Hired labor (%)                                                 | 2.8                          | 4.1                   |
| Hired and reciprocity or communal work (%)                      | 1.7                          | 1.4                   |
| <b>Potato cropping</b>                                          |                              |                       |
| Households planting bred varieties (%)                          | 64.8                         | 78.9                  |
| Households planting flourey landraces (%)                       | 99.4                         | 100.0                 |
| Households planting bitter landraces (%)                        | 39.8                         | 3.8                   |
| <b>Off-farm income</b>                                          |                              |                       |
| Households with off-farm sources of income (%)                  | 60.8                         | 68.7                  |

307 †Total number of households per landscape.

308 **Table 3. Logistic regression output (best model) of most significant differentiating**  
 309 **household characteristics between the Huancavelica and Pasco landscapes.**

| <b>Significant explanatory variables†</b> | <b>Odds ratio</b> | <b>2.50%</b> | <b>97.50%</b> |
|-------------------------------------------|-------------------|--------------|---------------|
| (Intercept)                               | 0.2401            | 0.0895       | 0.6169        |
| Number of children per household          | 0.6490            | 0.5250       | 0.7883        |

|                                             |        |        |        |
|---------------------------------------------|--------|--------|--------|
| Number of fields per household              | 1.9775 | 1.6270 | 2.4605 |
| Off-farm income                             | 3.4088 | 1.7822 | 6.7795 |
| Number of floury landraces                  | 0.9272 | 0.9001 | 0.9519 |
| Average area cultivated with bred varieties | 1.0012 | 1.0003 | 1.0023 |

310 †Significant explanatory variables correspond to variables used in the logistic regression model that were  
311 identified to significantly differentiate households in Pasco from those in Huancavelica. The odds ratio was  
312 calculated by exponentiating the coefficients (of significant variables) obtained from the logistic regression  
313 model, while the columns 2.5% and 97.5% correspond to the exponentiated confidence interval levels.

### 314 **3.2. Field-management characteristics**

315 The number of potato fields cropped per household was 2.7 ( $\pm 1.4$ ) in Huancavelica and 4.3  
316 ( $\pm 2.1$ ) in Pasco. Rented fields represented 11.9% of total fields only in Pasco. Potato  
317 production in Huancavelica was destined for household consumption for 78.0% and dual  
318 purpose (consumption and sale) for 22.0% of fields. In Pasco, production for sale represented  
319 60.0%, dual purpose 23.5%, and solely consumption 16.5%. Most field production had a  
320 secondary end use. In Huancavelica, farmers saved medium-sized tubers for both seed and  
321 making freeze-dried *chuño* from 90.7% of fields. Seed and *chuño* production exclusively  
322 were secondary uses for 8.1% and 0.4% of fields respectively. Only 0.8% of production from  
323 sampled fields had no secondary end use. In Pasco, secondary uses were seed and *chuño*  
324 production (20.0%), tuber seed exclusively (39.4%), *chuño* production exclusively (28.4%),  
325 seed and pig feed (4.8%), pig feed exclusively (1.1%), *chuño* and pig feed (0.8%). Only 5.5%  
326 of production from surveyed fields did not have any secondary end use.

327 In both landscapes, households followed two potato cropping calendars, the *qatun tarpuy*,  
328 literally ‘big planting’ (main season), and the *michka*, or small planting (off-season). The  
329 ‘big plantings’ coincide with the main rainy season and span from October-November  
330 (sowing period) to May-June (harvesting period). It is the most intensive season in terms of  
331 labor demands. The off-season plantings are short, involve small cropping areas and  
332 generally demand access to irrigation with sowing taking place from June to July (dry

333 season). Consequently, most potato fields mapped corresponded to the main season: 97.1%  
334 and 82.4% of fields in Huancavelica and Pasco respectively. The number of main and off-  
335 season fields per household, respectively, was 2.7 ( $\pm 1.3$ ) vs. 0.1 ( $\pm 0.2$ ) in Huancavelica, and  
336 3.5 ( $\pm 1.9$ ) vs. 0.8 ( $\pm 0.9$ ) in Pasco. Pasco had the longer potato-growing calendar. The number  
337 of days to harvest was 261.9 ( $\pm 32.1$ ) compared to 197.3 ( $\pm 21.7$ ) in Huancavelica. However,  
338 the minimum and maximum number of days to harvest recorded for each were similar: 121  
339 and 304 in Huancavelica vs. 120 and 309 in Pasco, depending on the cultivar group and  
340 specific cultivar involved.

341 All potato fields in Pasco and 44.7% of fields in Huancavelica received applications of  
342 chemicals (fungicides and fertilizers). Most potato fields, 71.9% in Huancavelica and 100%  
343 in Pasco, were managed with the *chiwa* tillage system, followed by *barbecho* (22.5%) and  
344 *chacmeo* (5.6%) in Huancavelica. In this central plateau, fields with floury landraces were  
345 tilled 73.1% *chiwa*, 23.2% *barbecho* and 3.7% *chacmeo*; fields with bred varieties were tilled  
346 68.8% *chiwa*, 22.4% *barbecho* and 8.8% *chacmeo*; and fields with bitter landraces were tilled  
347 95.2% *chiwa*, 1.9% *barbecho* and 2.9% *chacmeo*.

### 348 **3.3. Cultivar diversity, abundance and evenness**

349 Field sampling and focus group meetings resulted in the identification of 130 and 191 unique  
350 cultivars for Huancavelica and Pasco respectively. Floury landraces represented the bulk of  
351 diversity: 85.5% of cultivars in Huancavelica and 95.8% in Pasco. Bred varieties made up  
352 9.2% and bitter landraces 5.3% of cultivars in Huancavelica. In Pasco, bred varieties were  
353 3.7% and bitter landraces 0.5% of cultivar diversity. Floury landraces dominated households'  
354 portfolios (Table 4). The maximum number of cultivars for any household (56) was recorded



355 for this cultivar group in Pasco. Bred and bitter landraces registered a maximum household-  
 356 level cultivar count of 6 and 5 cultivars respectively in Huancavelica.

357 **Table 4. Number of distinct cultivars managed per household by cultivar group and**  
 358 **landscape.**

| Cultivar group   | Huancavelica   |                   |                 |                |                  | Pasco            |                |                   |                 |                |                   |
|------------------|----------------|-------------------|-----------------|----------------|------------------|------------------|----------------|-------------------|-----------------|----------------|-------------------|
|                  | N <sup>†</sup> | Av.               | Max.            | Min.           | SD               | Cultivar group   | N <sup>†</sup> | Av.               | Max.            | Min.           | SD                |
| Bred varieties   | 114            | 1.8               | 6.0             | 1.0            | 1.1              | Bred varieties   | 116            | 1.4               | 4.0             | 1.0            | 0.7               |
| Floury landraces | 175            | 12.5              | 42.0            | 1.0            | 7.1              | Floury landraces | 147            | 16.5              | 56.0            | 1.0            | 11.0              |
| Bitter landraces | 70             | 1.7               | 5.0             | 1.0            | 1.1              | Bitter landraces | 5              | 1.0               | 1.0             | 1.0            | 0.0               |
| Total            | 176            | 14.3 <sup>‡</sup> | 49 <sup>‡</sup> | 1 <sup>‡</sup> | 8.0 <sup>‡</sup> | Total            | 147            | 17.7 <sup>‡</sup> | 58 <sup>‡</sup> | 2 <sup>‡</sup> | 11.1 <sup>‡</sup> |

359 <sup>†</sup>Number of households planting each cultivar group.

360 <sup>‡</sup>Calculated from sum of distinct cultivars across the three cultivar groups.

361 We contrasted the spatial distribution and relative abundance of cultivars by cultivar group  
 362 (Fig 2A, 2B) and RCF level (Fig 3A, 3B) for a representative community in each landscape.  
 363 Red listing showed that most cultivars were very scarce (RCF<0.05) across households:  
 364 45.4% of total cultivars in Huancavelica and 61.7% in Pasco (Table 5). These were  
 365 predominantly floury landraces. Huancavelica showed comparatively more common and  
 366 abundant cultivars than Pasco. In terms of evenness, approximately two thirds of cultivars in  
 367 each landscape were grown by very few households (OCF<1%) or few households  
 368 (OCF<5%) while less than 15% of cultivars were present in the cropping portfolios of most  
 369 households (OCF>25%; Table 6). Overall, for the landscapes combined, 12.5% of cultivars  
 370 were in the cropping portfolios of most households while 29.6% were grown by less than 1%  
 371 of households.

372 **Fig 2A. Spatial distribution of bitter landraces, floury landraces and bred varieties in**  
 373 **the community of Bellavista, Pasco.**

374 **Fig 2B. Spatial distribution of bitter landraces, floury landraces and bred varieties in**  
 375 **the community of Huachhua, Huancavelica.**

376 **Fig 3A. Spatial distribution of cultivars selected for their top RCF index values in each**  
 377 **RCF level (very scarce, scarce, uncommon, common, abundant) in the community of**  
 378 **Bellavista, Pasco.**

379 **Fig 3B. Spatial distribution of cultivars selected for their top RCF index values in each**  
 380 **RCF level (very scarce, scarce, uncommon, common, abundant) in the community of**  
 381 **Huachhua, Huancavelica.**

382 **Table 5. Relative cultivar frequencies (RCF) or measure of relative abundance of**  
 383 **cultivars by cultivar group and landscape.**

| Cultivar group   | Huancavelica        |      |                  |     |                  |      |                  |      |                  |      |
|------------------|---------------------|------|------------------|-----|------------------|------|------------------|------|------------------|------|
|                  | Very scarce (<0.05) |      | Scarce (<0.10)   |     | Uncommon (<0.25) |      | Common (<1.00)   |      | Abundant (>1.00) |      |
|                  | No. of cultivars    | %*   | No. of cultivars | %   | No. of cultivars | %    | No. of cultivars | %    | No. of cultivars | %    |
| Bred varieties   | 3                   | 2.3  | 0                | 0.0 | 1                | 0.8  | 5                | 3.8  | 3                | 2.3  |
| Floury landraces | 55                  | 42.3 | 8                | 6.2 | 11               | 8.5  | 22               | 16.9 | 15               | 11.5 |
| Bitter landraces | 1                   | 0.8  | 0                | 0.0 | 1                | 0.8  | 2                | 1.5  | 3                | 2.3  |
| Total†           | 59                  | 45.4 | 8                | 6.2 | 13               | 10.1 | 29               | 22.2 | 21               | 16.1 |

  

| Cultivar group   | Pasco               |      |                  |      |                  |      |                  |     |                  |     |
|------------------|---------------------|------|------------------|------|------------------|------|------------------|-----|------------------|-----|
|                  | Very scarce (<0.05) |      | Scarce (<0.10)   |      | Uncommon (<0.25) |      | Common (<1.00)   |     | Abundant (>1.00) |     |
|                  | No. of cultivars    | %    | No. of cultivars | %    | No. of cultivars | %    | No. of cultivars | %   | No. of cultivars | %   |
| Bred varieties   | 2                   | 1.0  | 0                | 0.0  | 2                | 1.1  | 0                | 0.0 | 3                | 1.6 |
| Floury landraces | 116                 | 60.7 | 20               | 10.5 | 22               | 11.5 | 15               | 7.9 | 10               | 5.2 |
| Bitter landraces | 0                   | 0.0  | 0                | 0.0  | 1                | 0.5  | 0                | 0.0 | 0                | 0.0 |
| Total†           | 118                 | 61.7 | 20               | 10.5 | 25               | 13.1 | 15               | 7.9 | 13               | 6.8 |

384 \*Percent of total number of cultivars registered within each landscape: 130 in Huancavelica and 191 in Pasco.

385 †Total number of cultivars under each RCF category.

386 **Table 6. Overall cultivar frequencies (OCF) or measure of evenness of unique cultivars**  
 387 **by cultivar group and landscape.**

| Cultivar group   | Huancavelica              |      |                      |      |                        |      |                        |      |
|------------------|---------------------------|------|----------------------|------|------------------------|------|------------------------|------|
|                  | Very few households (<1%) |      | Few households (<5%) |      | Many households (<25%) |      | Most households (>25%) |      |
|                  | No. of cultivars          | %*   | No. of cultivars     | %    | No. of cultivars       | %    | No. of cultivars       | %    |
| Bred varieties   | 1                         | 0.8  | 4                    | 3.1  | 5                      | 3.8  | 2                      | 1.5  |
| Floury landraces | 34                        | 26.2 | 35                   | 26.9 | 26                     | 20.0 | 16                     | 12.3 |
| Bitter landraces | 0                         | 0.0  | 2                    | 1.5  | 4                      | 3.1  | 1                      | 0.8  |
| Total†           | 35                        | 27.0 | 41                   | 31.5 | 35                     | 26.9 | 19                     | 14.6 |

| Cultivar group   | Pasco                        |      |                         |      |                           |      |                            |      |
|------------------|------------------------------|------|-------------------------|------|---------------------------|------|----------------------------|------|
|                  | Very few households<br>(<1%) |      | Few households<br>(<5%) |      | Many households<br>(<25%) |      | Most households<br>(> 25%) |      |
|                  | No. of<br>cultivars          | %*   | No. of<br>cultivars     | %    | No. of cultivars          | %    | No. of cultivars           | %    |
| Bred varieties   | 2                            | 1.0  | 2                       | 1.0  | 1                         | 0.5  | 2                          | 1.0  |
| Floury landraces | 58                           | 30.4 | 55                      | 28.8 | 51                        | 26.7 | 19                         | 10.0 |
| Bitter landraces | 0                            | 0.0  | 1                       | 0.5  | 0                         | 0.0  | 0                          | 0.0  |
| Total†           | 60                           | 31.4 | 58                      | 30.3 | 52                        | 27.2 | 21                         | 11.0 |

388 \*Percent of total number of cultivars registered within each landscape: 130 in Huancavelica and 191 in Pasco.

389 †Total number of cultivars under each OCF category.

### 390 **3.4. Spatial management of intraspecific diversity**

#### 391 **3.4.1. Fields with one type of cultivar compared to fields with mixed groups**

392 Mixed fields with two to three cultivar groups contained the highest average number of  
393 distinct cultivars: 13 ( $\pm 8.8$ ) cultivars per field in Huancavelica and 14 ( $\pm 6.4$ ) in Pasco. The  
394 distribution of distinct cultivar groups within such mixed fields always involved separated  
395 sub-plots assigned to floury landraces, bitter landraces or bred varieties. Fields containing all  
396 three cultivar groups only made up 5.4% of the fields sampled in Huancavelica. In Pasco,  
397 most mixed fields comprised combinations of floury and bred cultivars and represented  
398 11.5% of all sampled fields. These contained an average of 11.8 ( $\pm 11.6$ ) cultivars per field.  
399 Bred varieties and floury landraces occurred together in 23.1% of fields in Huancavelica,  
400 with an average of 10.2 ( $\pm 5.4$ ) cultivars per field. Across landscapes, most fields were planted  
401 exclusively with floury landraces: 48.9% of fields in Huancavelica and 60.6% in Pasco with  
402 57.9% and 49.5% of these, respectively, containing *chaqru* mixtures of at least four cultivars.  
403 On average, exclusively floury fields contained 6.0 ( $\pm 5.5$ ) cultivars per field in Huancavelica  
404 and 6.0 ( $\pm 6.8$ ) in Pasco. A much lower proportion of fields contained exclusively bred  
405 varieties: 6.9% in Huancavelica and 27.1% in Pasco, with an average of 1.1 ( $\pm 0.3$ ) varieties  
406 per field in each landscape. Floury and bitter landraces occurred together in 11.4% of fields  
407 in Huancavelica and 0.6% in Pasco. Only in Huancavelica were fields planted exclusively

408 with bitter landraces (4.4%) at an average 1.3 ( $\pm 0.7$ ) cultivars per field. In Pasco bitter  
 409 landraces were grown with bred varieties and floury landraces in 0.8% of fields. In these  
 410 cases ( $n=5$ ) only one bitter landrace was cultivated out of an average of 15.8 total cultivars  
 411 per field. Floury landraces were allocated the most fields per household in both landscapes  
 412 (Table 7). In Pasco, the average number of fields per household with exclusively floury  
 413 landraces and exclusively bred varieties surpassed that of Huancavelica by roughly one field.  
 414 **Table 7. Average number of fields per household for exclusive and mixed fields by**  
 415 **cultivar group and landscape.**

| Cultivar group    | Huancavelica |     |      |      |     | Pasco |     |      |      |     |
|-------------------|--------------|-----|------|------|-----|-------|-----|------|------|-----|
|                   | N†           | Av. | Max. | Min. | SD  | N†    | Av. | Max. | Min. | SD  |
| Bred varieties    | 32           | 1.0 | 2.0  | 1.0  | 0.2 | 90    | 1.9 | 5.0  | 1.0  | 1.0 |
| Floury landraces  | 126          | 1.9 | 5.0  | 1.0  | 0.9 | 138   | 2.7 | 8.0  | 1.0  | 1.7 |
| Bitter landraces  | 18           | 1.2 | 3.0  | 1.0  | 0.5 | -     | -   | -    | -    | -   |
| Mixed (BR+FL)‡    | 81           | 1.4 | 4.0  | 1.0  | 0.7 | 52    | 1.4 | 3.0  | 1.0  | 0.6 |
| Mixed (FL+BL)‡    | 47           | 1.2 | 2.0  | 1.0  | 0.4 | 4     | 1.0 | 1.0  | 1.0  | 0.0 |
| Mixed (BR+FL+BL)† | 26           | 1.0 | 1.0  | 1.0  | 0.0 | 1     | 1.0 | 1.0  | 1.0  | -   |

416 †Number of households managing each field type.

417 ‡BR=bred varieties, FL=floury landraces, BL=bitter landraces.

### 418 3.4.2. Cropping areas

419 The total potato cropping area differed considerably between landscapes: 35.0 ha for 176  
 420 households in Huancavelica and 81.0 ha for 147 households in Pasco. Total areal proportions  
 421 by cultivar group were 82.9% vs. 74.2% for floury landraces, 9.2% vs. 25.7% for bred  
 422 varieties and 7.9% vs. 0.1%, for bitter landraces in Huancavelica and Pasco respectively. On  
 423 average, the total household potato cropping area was 1,989 ( $\pm 1,588$ ) m<sup>2</sup> in Huancavelica  
 424 and 5,509 ( $\pm 3,994$ ) m<sup>2</sup> in Pasco. Households in Huancavelica tend to manage much smaller  
 425 areas. Floury cultivars comparatively occupied the largest areas per household (Table 8).  
 426 These were 5.9 and 2.3-fold the cropping areas of bred varieties and bitter landraces,  
 427 respectively, in Huancavelica, and 4.2 and 70.2-fold the cropping areas of their counterparts

428 in Pasco. Household field sizes were notably different between the two landscapes (Table 9).  
 429 These always tended to be two to three times larger for households in Pasco for fields with  
 430 bred varieties and floury landraces or a mix of these two cultivar groups.

431 **Table 8. Average total cropping area (m<sup>2</sup>) per household by cultivar group and**  
 432 **landscape.**

| Huancavelica     |                |      |      |      |      |
|------------------|----------------|------|------|------|------|
| Cultivar group   | N <sup>†</sup> | Av.  | Max. | Min. | SD.  |
| Bred varieties   | 114            | 282  | 1569 | 6    | 284  |
| Floury landraces | 175            | 1655 | 7323 | 43   | 1401 |
| Bitter landraces | 70             | 404  | 1689 | 2    | 363  |

433

| Pasco            |                |      |       |      |      |
|------------------|----------------|------|-------|------|------|
| Cultivar group   | N <sup>†</sup> | Av.  | Max.  | Min. | SD.  |
| Bred varieties   | 116            | 1797 | 8219  | 1    | 1774 |
| Floury landraces | 147            | 4086 | 21687 | 222  | 3832 |
| Bitter landraces | 5              | 58   | 271   | 1    | 119  |

<sup>†</sup>Number of households planting each cultivar group.

434 **Table 9. Average area (m<sup>2</sup>) per field for exclusive and mixed fields by cultivar group**  
 435 **and landscape.**

| Cultivar group    | Huancavelica   |      |      |      |      | Pasco          |      |       |      |      |
|-------------------|----------------|------|------|------|------|----------------|------|-------|------|------|
|                   | N <sup>†</sup> | Av.  | Max. | Min. | SD.  | N <sup>†</sup> | Av.  | Max.  | Min. | SD.  |
| Bred varieties    | 33             | 340  | 1465 | 23   | 333  | 168            | 1069 | 6818  | 96   | 984  |
| Floury landraces  | 235            | 627  | 3922 | 9    | 608  | 376            | 1320 | 13283 | 9    | 1562 |
| Bitter landraces  | 21             | 285  | 883  | 40   | 220  | -              | -    | -     | -    | -    |
| Mixed (BR+FL)‡    | 111            | 826  | 5904 | 55   | 902  | 71             | 1846 | 12917 | 44   | 2181 |
| Mixed (FL+BL)‡    | 55             | 919  | 3219 | 99   | 768  | 4              | 520  | 1375  | 17   | 613  |
| Mixed (BR+FL+BL)‡ | 26             | 1660 | 5898 | 193  | 1602 | 1              | 821  | 821   | 821  | -    |

436 <sup>†</sup>Number of fields for each exclusive and mixed cultivar group type.

437 <sup>‡</sup> BR=bred varieties, FL=floury landraces, BL=bitter landraces.

### 438 3.4.3. Contemporary range of altitudes at which potatoes are grown

439 The altitudinal distribution of potato differed by 200 m between landscapes, with Pasco  
 440 having a slightly wider range (3,000–4,200 m) and distribution in Huancavelica reaching  
 441 higher altitudes (3,400–4,400 m) (Fig 4). In Huancavelica and Pasco, respectively, 84.9%  
 442 and 83.5% of cultivation in terms of areal coverage occurred between 3,800 m and 4,200 m,

443 and 3,700 m and 4,100 m. Cultivation of bred varieties and floury landraces began at 3,097  
444 m and 3,264 m in Pasco vs. 3,464 m and 3,521 m in Huancavelica. Bred varieties and floury  
445 landraces overlapped for a 900 m range in both landscapes: from 3,500 m to 4,400 m in  
446 Huancavelica and 3,200 m to 4,100 m in Pasco. Across cultivar groups and landscapes, bred  
447 varieties occupied the widest altitudinal distribution of 1,100 m while bitter landraces had a  
448 narrow range of 400 m in Pasco. Bitter landraces began to occur at 3,800 m vs. 3,600 m of  
449 altitude in Huancavelica and Pasco respectively. All three cultivar groups overlapped  
450 between 3,800 m and 4,400 m in Huancavelica and 3,600 m and 4,000 m in Pasco.

451 **Fig 4. Total potato cropping area by cultivar group (bred, floury, bitter) and landscape**  
452 **(Huancavelica = H, Pasco = P) across the altitudinal range from 3000 to 4400 m.a.s.l.**

453 We also examined the number of cultivars per field for incremental 100-meter altitudinal  
454 belts in each landscape. In Huancavelica, the highest concentration of cultivars occurred at  
455 the 4,000–4,100 m altitudinal belt with an average 37.0 ( $\pm 12.7$ ) and maximum 46 cultivars  
456 per field. These were floury, bitter and bred cultivars. This was the case at 3,900–4,000 m  
457 with an average 22.3 ( $\pm 11.6$ ) and maximum 50 cultivars per field in Pasco, involving only  
458 floury landraces and bred varieties. The highest levels of within-field diversity are  
459 concentrated at the upper limits.

### 460 **3.5. Temporal characteristics of intraspecific diversity**

#### 461 **3.5.1. Fallow in rotations**

462 Of 1,101 surveyed fields, 92.4% had a fallow period in the rotation. Remaining fields were  
463 cultivated uninterruptedly. The average period was a total of 7.4 years, either continuous or  
464 with one year of potato cultivation between two resting periods, for the ten-year cropping  
465 cycle recalled in the study. Fields with a fallow in the rotation represented 96.3% of fields in  
466 Huancavelica and 89.4% in Pasco. Average field-level fallowing rates were calculated for

467 exclusive and mixed fields by cultivar group (Table 10). Fields containing exclusively bred  
 468 varieties in Pasco showed the lowest fallowing rates (4.4 out of 10 years) and most intensive  
 469 management compared to fields exclusively containing flourey landraces (8.3 out of 10 years).  
 470 Therefore, discriminatory management for fields with exclusively bred varieties or landraces  
 471 occurred in Pasco. This was not the case in Huancavelica, where differences in fallowing  
 472 periods between cultivar groups were smaller: 7.5, 7.4 and 7.2 years for fields containing  
 473 bred varieties, flourey and bitter landraces respectively. In both landscapes, we found a  
 474 significant positive relationship ( $p < 0.001$ ) between the fallowing rate and altitude of fields  
 475 (Fig 5A, 5B). The duration of fallowing periods tended to increase with altitude. However,  
 476 in Pasco this relationship was stronger ( $R = 0.35$ ) compared to Huancavelica ( $R = 0.12$ ).

477 **Table 10. Average fallowing rates for exclusive and mixed fields by cultivar group and**  
 478 **landscape.**

| Cultivar group    | N†  | Huancavelica |      |      |      |     | Pasco |      |      |      |  |
|-------------------|-----|--------------|------|------|------|-----|-------|------|------|------|--|
|                   |     | Av.          | Max. | Min. | SD.  | N†  | Av.   | Max. | Min. | SD.  |  |
| Bred varieties    | 33  | 0.75         | 0.90 | 0.33 | 0.17 | 168 | 0.44  | 0.90 | 0.00 | 0.37 |  |
| Flourey landraces | 235 | 0.74         | 0.90 | 0.00 | 0.19 | 376 | 0.83  | 0.90 | 0.50 | 0.07 |  |
| Bitter landraces  | 21  | 0.72         | 0.90 | 0.50 | 0.10 | -   | -     | -    | -    | -    |  |
| Mixed (BR+FL)‡    | 111 | 0.76         | 0.90 | 0.00 | 0.13 | 71  | 0.78  | 0.90 | 0.00 | 0.19 |  |
| Mixed (FL+BL)‡    | 55  | 0.69         | 0.90 | 0.00 | 0.23 | 4   | 0.89  | 0.90 | 0.88 | 0.01 |  |
| Mixed (BR+FL+BL)‡ | 26  | 0.67         | 0.90 | 0.00 | 0.26 | 1   | 0.80  | 0.80 | 0.80 | -    |  |

479 †Number of fields for each exclusive and mixed cultivar group type.

480 ‡BR=bred varieties, FL=flourey landraces, BL=bitter landraces.

481 **Fig 5. Significance of relationship between fallowing rate and altitude in the**  
 482 **Huancavelica (A) and Pasco (B) landscapes.**

### 483 3.5.2. Rotation sequences

484 Most fields involved only potato in their cropping sequences: 54.1% in Huancavelica and  
 485 98.9% in Pasco. In Huancavelica, 7.3% of these fields involved two cultivar groups into their  
 486 rotations, i.e. a bred varieties–flourey landraces or flourey landraces–bitter landraces sequence,

487 and subsequently a fallow period. Remaining fields exclusively involving potato in this  
488 landscape obeyed the sequence bred varieties–fallow (6.5%), flourey landraces–fallow  
489 (51.2%), bitter landraces–fallow (2.3%) and 32.7% involved mixed cultivar groups followed  
490 by a fallowing period. In Pasco, 10.3% of fields exclusively involving potato did not include  
491 a fallowing period in the cropping rotation. These were either uninterrupted bred varieties–  
492 flourey landraces sequences (8.5%) or entirely dominated by bred varieties (1.8%). In this  
493 landscape, 16.1% of fields exclusively involving potato included bred varieties and flourey  
494 landraces as mixed plots in a cropping sequence with a fallow, while 13.1% and 60.5% had  
495 a bred varieties–fallow and flourey landraces–fallow sequence respectively.

496 Rotation sequences with other crop species were more varied and frequent in Huancavelica  
497 than Pasco at both intermediate and high altitudinal ranges (Fig 6). In Huancavelica, 44.5%  
498 of potato fields integrated cereals (oats, barley), 1.2% legumes (faba, lupine), 1.2% grasses  
499 (*Lolium multiflorum*), and 0.6% minor Andean tubers (*Ullucus tuberosus*, *Tropaeolum*  
500 *tuberosum*) in the rotation. Cereals were not included at all in rotation sequences with the  
501 potato in Pasco, and only 1.0% of fields incorporated a legume (peas) and 0.2% an Andean  
502 tuber (*Tropaeolum tuberosum*). Cereals were planted after flourey landraces (20.8%), bitter  
503 landraces (2.7%), bred varieties (2.5%) and fields containing mixed cultivar groups (18.3%)  
504 in Huancavelica. Legumes in this landscape were planted after flourey landraces (0.2%), bred  
505 varieties (0.6%) and mixed bred and flourey cultivars (0.4%). All cropping sequences  
506 containing legumes and Andean tubers in Pasco occurred after bred varieties.

507 **Fig 6. Pattern analysis of cropping sequences for intermediate and high-range altitude**  
508 **fields in each landscape.**

509 **3.5.3. Association of fields with sectoral fallowing systems**



510 Fields associated with a communal sectoral fallowing system comprised 32.4% of all  
511 surveyed fields and 33.5% of the total potato cropping area in Huancavelica. In Pasco, they  
512 represented 89.2% of fields and 92.1% of its total potato cropping area. The total area with  
513 potato under sectoral fallowing was 11.7 ha in Huancavelica and 74.5 ha in Pasco. These  
514 were covered 84.7% with flouy landraces, 7.1% with bred varieties, and 8.2% with bitter  
515 landraces in Huancavelica. The potato cropping area under sectoral fallowing in Pasco was  
516 80.5% flouy landraces, 19.5% bred varieties and 0.04% bitter landraces. Areas that were not  
517 part of a sectoral fallowing regime comprised 23.3 ha in Huancavelica and 6.5 ha in Pasco.  
518 These were allocated 82.0% flouy landraces, 10.2% bred varieties and 7.8% bitter landraces  
519 in Huancavelica; and 1.6% flouy landraces, 98.4% bred varieties and 0.0% bitter landraces  
520 in Pasco. One hundred (100) of 130 cultivars in Huancavelica and 189 of 191 cultivars in  
521 Pasco occurred in areas under sectoral fallowing. Areas that were not managed as part of a  
522 sectoral fallow contained 105 cultivars in Huancavelica and 25 in Pasco.

523 In each landscape, we compared fields associated and not associated with sectoral fallowing  
524 systems for cultivar diversity per field, field size, and altitude. We identified significant and  
525 opposing differences in the altitudinal distribution of fields associated and not associated  
526 with sectoral fallowing systems. While in Huancavelica fields in sectoral fallows had a  
527 significantly lower median value in altitude compared to those outside such sectors (3,938  
528 ( $\pm 94$ ) m vs 4,090 ( $\pm 134$ ) m,  $W=8823$ ,  $p=2.2e-16$ ), in Pasco, fields in sectoral fallows had a  
529 significantly higher median altitudinal value than fields dissociated from sectors (3,836  
530 ( $\pm 175$ ) m vs. 3,679 ( $\pm 145$ ) m,  $W=30302$ ,  $p=2.2e-16$ ). No significant differences ( $p>0.05$ )  
531 were observed in cultivar diversity and field size between fields associated and not associated  
532 with sectoral fallows in Huancavelica. However, significant differences were observed for

533 the same in Pasco. Sector fields had higher median values with respect to the total number of  
534 cultivars (5.9 ( $\pm 7.6$ ) vs. 1.4 ( $\pm 2.5$ ) cultivars per field,  $W=27582$ ,  $p=4.481e-12$ ) and field size  
535 (1,348 ( $\pm 1,555$ ) m<sup>2</sup> vs. 958 ( $\pm 1,235$ ) m<sup>2</sup>,  $W=23107$ ,  $p=0.0009386$ ) in comparison to non-  
536 sector fields.

537 The sectoral following sectors in Pasco were specifically targeted to landraces concentrating  
538 high levels of cultivar diversity while the non-sectoral following land, subject to household-  
539 level decision-making, was predominantly destined to bred varieties and a limited number of  
540 commercial landraces in comparatively smaller field areas. Such a pattern does not show for  
541 Huancavelica where areal arrangements for cultivar group portfolios and cultivar diversity  
542 are evenly distributed across the two land-use systems.

### 543 **3.6. Landscape differences by ‘fixed’ altitudinal ranges**

544 Based on the generalized linear model (with elastic-based penalization) (see Materials and  
545 methods, section 2.6), we identified characteristics that significantly differentiated the  
546 management of intermediate-range fields (3,500 m to 3,899 m) across Huancavelica and  
547 Pasco. Product end use, tillage type, and mixed-cultivar fields were the top differentiators for  
548 this altitudinal range (Fig 7A; S1 Fig A, B, C). Intermediate-range fields in Pasco were  
549 significantly associated with production for sale (65% of fields), while in Huancavelica it  
550 was consumption as end use (95% of fields). Further, intermediate-range fields in  
551 Huancavelica were significantly associated with mixed-cultivar groupings containing floury  
552 and bitter landraces (12 % of fields), in contrast to Pasco, where less than 0.1% of its fields  
553 at this range showed this cultivar combination. Tillage type also differentiated the landscapes  
554 significantly, with all fields in Pasco being managed through *chiwa* tillage. In Huancavelica,

555 82.5%, 10.3% and 7.2% of fields at this range were tilled using *chiwa*, *chacmeo* and *barbecho*  
556 respectively.

557 **Fig 7. Farmer management associated variables listed in order of significance in**  
558 **differentiating (A) intermediate and (B) high-altitude fields between landscapes.**

559 Analysis of upper-range fields (3,900 m to 4,324 m) revealed that fallowing ratio, number of  
560 fields associated with sectors, product end use, and chemical inputs were the top  
561 differentiating features of potato production between landscapes (Fig 7B; S1 Fig D, E, F).  
562 All fields in Pasco belonged to a fallowing sector. This applied to 23.3% of fields in  
563 Huancavelica. Field fallowing rates were also higher in Pasco at this range, 0.85 ( $\pm 0.06$ ) vs.  
564 0.76 ( $\pm 0.15$ ) in Huancavelica. A significantly higher proportion of high-range fields (50%)  
565 was associated with sale in Pasco, in contrast to Huancavelica where significantly more fields  
566 (73%) were destined to consumption. Chemical inputs characterized all high-range fields in  
567 Pasco but only 31.9% of fields in Huancavelica. Seed source further significantly  
568 differentiated upper-range fields between landscapes, with farmers' own seed applying to  
569 99.7% of high-range fields in Huancavelica and 49.3% of fields in Pasco. In addition, high-  
570 range fields containing all cultivar groups occurred only in Huancavelica.

571 **3.7. A timeline comparison of altitudinal distribution**

572 The average altitudinal distribution of potato landraces in the two landscapes examined in  
573 this study has shifted upward by 330 m for floury landraces and 102 m for bitter landraces  
574 when comparing current ranges with those of passport data from the 1975–1985 genebank  
575 collection (Table 11; Fig 8; Fig 9). Pasco showed the greatest upward shift of 404 m for  
576 floury landraces. For bitter landraces, the upward shift has been less pronounced overall.  
577 However, in Huancavelica bitter landraces still showed a shift of 174 m. This contrasts with

578 Pasco, where this cultivar group has, on average, moved upward by 31 m, although these  
579 results were obtained from a small number of samples.

580 **Table 11. Altitude of landraces from 1975 to 2013 in the Huancavelica and Pasco**  
581 **landscapes.**

| <b>1975-1985</b> | <b>N†</b> | <b>Av.</b> | <b>Max.</b> | <b>Min.</b> | <b>SD.</b> |
|------------------|-----------|------------|-------------|-------------|------------|
| Huancavelica     | 31        | 3811       | 3973        | 3025        | 174        |
| Floury landraces | 29        | 3801       | 3973        | 3025        | 176        |
| Bitter landraces | 2         | 3948       | 3948        | 3948        | 0          |
| Pasco            | 32        | 3519       | 3913        | 3135        | 165        |
| Floury landraces | 27        | 3494       | 3641        | 3135        | 156        |
| Bitter landraces | 5         | 3658       | 3913        | 3475        | 159        |
| <b>2012-2013</b> | <b>N</b>  | <b>Av.</b> | <b>Max</b>  | <b>Min</b>  | <b>SD</b>  |
| Huancavelica     | 3323      | 4056       | 4324        | 3464        | 133        |
| Floury landraces | 2929      | 4057       | 4324        | 3521        | 128        |
| Bitter landraces | 153       | 4122       | 4324        | 3521        | 164        |
| Pasco            | 3387      | 3883       | 4116        | 3097        | 125        |
| Floury landraces | 3132      | 3897       | 4116        | 3264        | 104        |
| Bitter landraces | 5         | 3829       | 3944        | 3646        | 117        |

582 †Number of reference cultivar samples.

583 **Fig 8. Altitudinal distribution of floury landraces (1975-2013) in m.a.s.l. (H =**  
584 **Huancavelica, P = Pasco).**

585 **Fig 9. Altitudinal distribution of bitter landraces (1975-2013) in m.a.s.l. (H =**  
586 **Huancavelica, P = Pasco).**

587 Maximum and minimum altitudinal distribution values also showed notable changes. The  
588 maximum reported altitude for floury landraces has increased by 475 m in Pasco and 351 m  
589 in Huancavelica. For bitter landraces in Huancavelica the shift in maximum altitude has been  
590 376 m. As to minimum altitudes, floury landraces showed the highest increase by 496 m in  
591 Huancavelica. In Pasco the minimum altitude recorded for floury landraces has risen by 129  
592 m. The minimum altitude recorded for bitter landraces was surprisingly 427 m lower in 2013  
593 than in 1975-1985 in Huancavelica, but it has shown a 171 m increase in Pasco.

## 594 **4. Discussion**

### 595 **4.1. Hybrid landscapes and smallholder intensification**

596 Our results show that smallholder land-use systems are spatially and temporally versatile,  
597 incorporating adaptations of traditional management practices to facilitate intensification.  
598 Such modifications of Andean cropping system components, allowing for the need to  
599 accommodate environmental and socio-economic pressures, have also been described by  
600 others [2,21,30,31]. Intensification is occurring in its most basic form through shortening of  
601 fallow periods, but differently in each landscape. In Pasco, farmers ensure their ongoing  
602 production for both market and consumption by shortening the fallow period in their low-  
603 altitude fields while simultaneously maintaining long recovery periods in the upper-altitude  
604 range where most of the intraspecific diversity is also concentrated. The better household-  
605 level availability and access to land compared to Huancavelica enables farmers to manage  
606 their resources differentially and sustain commercial production of a few commercial  
607 cultivars while conserving diverse landrace portfolios at high altitude. In Huancavelica, on  
608 the other hand, the comparatively shorter fallow periods across all fields relate to diminishing  
609 land availability in a context of demographic pressure. With twice as many children and one  
610 third the total potato cropping area compared to Pasco, the only options that households have  
611 in this landscape involve shortened fallows and expanded cultivation at increasingly high  
612 altitudes [56,67]. Adaptations become a necessity in contexts where land scarcity, the need  
613 for cash income from agriculture, and increased market orientation drive smallholder land  
614 use decisions [27,68].

615 Hybrid land-use systems that integrate traditional and modern practices are common as  
616 smallholders adjust to changing production conditions and livelihood prospects in different

617 ways [28,69,70]. This is notable in Pasco where, despite market-oriented intensification, two  
618 traditional land-use management components are more strongly maintained compared to the  
619 subsistence-oriented land-use systems of Huancavelica. Firstly, potato tillage in Pasco  
620 involved only the *chiwa* minimal-tillage system. This practice is common to sloping and  
621 high-altitude farming environments where the traditional foot plough or *chakitaklla* is  
622 typically used instead of animal or mechanical traction [56,71]. A plausible explanation is  
623 erosion prevention on steep slopes under high rainfall conditions. Secondly, 92.1% of  
624 Pasco's potato cropping area belonged to communal sectoral fallowing systems compared to  
625 only 33.5% of Huancavelica's area. Intensification clearly hasn't led to the disintegration of  
626 communal fallows.

627 Farmers in Pasco resorted to renting fields. This is only possible if land becomes available  
628 from households that have either migrated or oriented labor toward off-farm employment.  
629 Income generation through non-agricultural activities characterizes rural livelihoods across  
630 the Andes [1,8,11,14]. Therefore, commercial agriculture partly drives intensification in  
631 Pasco. This is reflected not only in the low fallowing rates for fields where cultivation with  
632 bred varieties for sale is a priority but also by the consistent application of external inputs  
633 (fertilizers, fungicides) by all households. The use of chemicals can be partially attributed to  
634 high levels of late blight pressure. Except for a few bred varieties, most cultivars are actually  
635 highly susceptible to the disease [72,73]. In contrast, in Huancavelica's subsistence-oriented  
636 production systems, fallowing rates were particularly influenced by altitude, and the use of  
637 chemicals was very modest.

638 Huancavelica displays its own form of smallholder intensification in response to change. The  
639 traditional management of fields through communally coordinated sectors has to a large

640 extent disintegrated and been replaced by cropping rotations that are directly decided upon  
641 at the household level. The disintegration and adaptations of sectoral fallowing systems have  
642 been documented throughout the Andes [30,31,45,48,74]. They are often a result of  
643 population growth, land scarcity, and the micro-fragmentation of landholdings, but have also  
644 been observed where access to irrigation provides smallholders with other crop production  
645 options [12,67]. Soil degeneration and socio-cultural factors such as interrupted transmission  
646 of knowledge and discontinuity of communal decision-making institutions may also play a  
647 role [75,76].

#### 648 **4.2. Conservation of landrace diversity amidst market specialization**

649 A major driver of land-use change relates to economic integration and the consequent  
650 requirement for smallholders to specialize [77–79]. This tendency has previously been  
651 associated with diminished levels of crop varietal diversity [80–82]. In this study, we  
652 demonstrate that more subsistence-oriented agriculture does not necessarily encapsulate the  
653 highest landrace diversity. The commercial potato production in Pasco, which requires the  
654 adoption of intensive management practices, does not exclude parallel landrace conservation.  
655 These findings contrast with those reported in Ecuador by Skarbø (2014), who found a  
656 positive association between subsistence farming, Kichwa ethnicity and language, and the  
657 landrace richness of maize (*Zea mays*), common beans (*Phaseolus vulgaris*) and potatoes  
658 (*Solanum* spp.). Smallholders in Pasco, mostly mestizo Spanish speakers, are market-  
659 oriented producers of ware potato, particularly of bred varieties and commercial floury  
660 landraces. These smallholders intended the production of two-thirds of their total fields  
661 exclusively for sale, and consistently interacted with traders at the Carhuamayo market. In  
662 contrast, in Huancavelica only about one-fifth of fields were dual-purpose—destined to both  
663 consumption and sale—with the remainder being exclusively stored for home consumption.

664 Yet, in Pasco, the total landrace diversity observed at the household and landscape levels was  
665 higher compared to Huancavelica. Market specialization and the allocation of significant  
666 areas to bred varieties does not displace landrace diversity, as Zimmerer (2013) also  
667 evidenced in Bolivia, where cash crop intensification and maize (*Zea mays*) agrobiodiversity  
668 were found to co-occur in smallholder landscapes.

669 Conversely, subsistence-oriented production accommodated more bred varieties in  
670 Huancavelica than in Pasco. Both as household-level average and as proportion of their  
671 collective cultivar diversity, more bred varieties were present in Huancavelica. Although not  
672 strictly market-oriented, smallholders in Huancavelica have integrated modern breeds into  
673 their portfolios due to their comparative advantage in terms of earlier maturation—which  
674 makes food available during the lean period—and ample accessibility in seed networks  
675 [57,83]. This occurs even as the average cropping area per household is nearly three times  
676 smaller in Huancavelica than in Pasco. Here, predominantly indigenous Quechua-speaking  
677 smallholders don't generate excess production for sale but maintain diversified cultivar  
678 portfolios with a higher representation of bred varieties and bitter landraces. In terms of areal  
679 coverage, there is more land available for diversity in Pasco. While proportionally Pasco's  
680 diversity was grown on a smaller fraction of the household's total potato area, in absolute  
681 terms the area occupied by landraces per household was nearly twice as large compared to  
682 Huancavelica. On the other hand, in Pasco more landraces were scarce or very scarce as they  
683 occupied a small proportion of the total cultivar portfolio. This can be partially explained by  
684 the way farmers allocate land and prioritize labor to generate an income. However,  
685 environmental factors likely also play a crucial role.



686 The source of seed tubers was almost entirely (99.6%) farm-saved in Huancavelica, but in  
687 Pasco this was only the case for 52.9% of fields. The extremely high altitudes at which potato  
688 cultivation occurs in Huancavelica are favorable for preventing virus infection and assuring  
689 seed health [84,85]. Pasco, in contrast, is a high-risk zone for late blight disease and farmers  
690 mentioned seed quality as a continual concern. Seed degeneration resulting from cumulative  
691 pathogen and pest infestation over successive cropping cycles detrimentally affects yield  
692 performance and easily spreads across smallholder Andean networks [86]. Farmers in Pasco  
693 partially renew their seed stocks frequently by sourcing from higher-altitude production  
694 zones that meet their perceptions of quality for floury landrace production [57,87]. With  
695 climate change, pest and disease pressure is likely to increase, warranting continuous  
696 monitoring of seed security and the conservation status of landrace diversity in both  
697 landscapes.

#### 698 **4.3. Uneven contemporary spatial distribution of landrace diversity**

699 Our findings show that high intraspecific diversity persists in each landscape and collectively  
700 in Peru's central Andes, especially of floury landraces. Yet this diversity is unequally  
701 distributed across landscapes. It is mostly concentrated at extremely high altitudes between  
702 3,900 m and 4,200 m above sea level. The field scattering, overlap between cultivar groups,  
703 and use of mixed portfolios between and within fields show remarkable environmental  
704 plasticity and organizational ingenuity. It involves a continued use of diversity to adapt to an  
705 unpredictable environment and multiple production objectives [39,54,88]. Nonetheless,  
706 farmers commonly only prioritize five to seven landraces to meet mostly consumption or  
707 market needs. Bred varieties, which are a minor portion of the total varietal diversity (6.1%),  
708 cover the widest altitudinal distribution range while most landrace diversity is concentrated  
709 in a very narrow altitudinal range. This finding, confirming earlier reports of this kind of

710 altitudinal concentration [30], suggests that diversity is potentially vulnerable with pests and  
711 diseases ‘pushing’ landraces upwards to limits where abiotic stress is highest (frost, hail) and  
712 land use for cropping competes with livestock.

713 Bitter landraces, which are characterized by relatively low diversity, were assigned only  
714 minimal area and were generally absent from farmers’ fields. Their apparent disappearance  
715 from the portfolios of most farmers may be the result of decreasing labor availability (needed  
716 to process them into *chuño*), changing consumer behavior, and less predictable frosts (in  
717 June) [89,90]. Clearly, bitter landraces are at risk of being lost. The conservation dynamics  
718 of this special cultivar group warrants closer attention as their genetic potential is key to  
719 future breeding strategies to cope with abiotic stressors [40]. Traditional fallowing systems  
720 or *laymis* have been reservoirs of high intraspecific diversity in the central Andes. Yet,  
721 landrace diversity is not restricted to fields in fallowing sectors. In Huancavelica, the landrace  
722 diversity is currently contained in a landscape matrix of fields under a non-traditional  
723 household-level rotation with low-input management. In Pasco, the bulk of farmers’ diversity  
724 continues to occur in communally coordinated sectoral fallowing system with discriminatory,  
725 intensive management driven by market integration and late blight disease pressure. The  
726 above shows that diversity is being maintained as part of dynamic and adaptive management  
727 strategies.

728 Across landscapes, cultivar groups were not spatially separated but rather overlapped and to  
729 a large extent shared the same space. This finding confirms that rationales other than niche  
730 adaptation drive farmers’ spatial management of intraspecific diversity [2,88,91]. Potato  
731 cultivation in the two landscapes studied has moved upward by an average of 306 m since  
732 1975. The altitudinal shift is most dramatic for floury landraces. For this cultivar group,

733 contemporary maximum and minimum altitudes are 475 m and 500 m above that reported  
734 38 years ago according to CIP passport data from collections. The incursion of the potato  
735 into higher altitudes has been previously documented and is explained by the compounding  
736 effect of environmental and social factors [22,29,56]. Changes in temperature and  
737 precipitation patterns, and lower number of and more erratic frosts are affecting agriculture  
738 in the central Andes [92–94]. Higher incidence of pests and disease is associated with  
739 climatic variability and further driving crop cultivation into higher altitudes [3,6,95]. Soil  
740 degradation also increasingly affects productivity in smallholder contexts, where population  
741 growth is pushing land-use systems beyond their capacity and into the upper limits of where  
742 agriculture is possible [20,75]. Potatoes and their upward movement represent the highest  
743 cropping globally. Their changing land-use dynamics requires closer attention to understand  
744 the trade-offs and limitations of further altitudinal range expansion.

#### 745 **4.4. Study limitations**

746 Assessments of land-use change and agrobiodiversity ideally require systematic comparisons  
747 over long periods. Data availability for timeline comparison is a constant limitation. In this  
748 study, we used a detailed inventory based on participatory GIS to examine the current  
749 situation. Yet, it represents only one season and does not account for inter-seasonal variation.  
750 We recorded the application of chemicals per field (yes/no) but did not measure the frequency  
751 or amounts of fertilizers and fungicides used. We therefore have no way of providing a fine-  
752 grained comparison of this type of intensification within and across landscapes. Further, we  
753 used folk taxonomy and focus group meetings to derive a master list of unique cultivars  
754 within and across landscapes. This is an adequate but imperfect way of classifying diversity,  
755 since it does not attain the precision provided by morphological and molecular  
756 characterization. Lastly, the genebank passport data from 1975–1985 only allowed for

757 comparisons of altitudinal ranges for a limited number of floury and bitter landraces,  
758 excluding bred varieties.

## 759 **5. Conclusions**

760 The land-use dynamics of potato agrobiodiversity in the highlands of central Peru  
761 demonstrates remarkable adaptability in response to modern-day pressures. This is based on  
762 smallholder modification of traditional practices. High intraspecific diversity is maintained  
763 in these mixed, hybrid land-use systems. In each of the landscapes, intensification is taking  
764 place in different and rather unexpected ways. Whether predominantly market or subsistence-  
765 oriented, smallholder households inform their land-use decisions by drawing from the  
766 changing dynamics of their agroecological and socioeconomic contexts, increasingly geared  
767 toward intensification, i.e. shorter fallowing periods and chemical applications. Importantly,  
768 land availability gives smallholder households a comparative advantage by simultaneously  
769 enabling potato landrace conservation and market production. When it comes to on-farm  
770 agrobiodiversity, attributing the onus of its persistence on smallholders' fields to market  
771 specialization may obscure the role of the other demographic, social, and environmental  
772 factors inherent in global change. Driven by population growth and pest and disease pressure,  
773 potato cultivation has moved into the upper limits of where agriculture is possible as shown  
774 by the comparison of contemporary altitudinal distributions with those of CIP's genebank  
775 collections nearly four decades ago. Its landrace diversity is now concentrated in a narrow,  
776 upward moving altitudinal belt. The plasticity shown by the potato and the adaptability of  
777 smallholder land-use systems do not necessarily confer them resilience into the future. To  
778 gauge the on-farm dynamics of the potato in its center of crop origin systematic and long-  
779 term monitoring will be crucial. Its *in situ* conservation warrants the exploration of other  
780 options, such as the creation of incentives for smallholders' diversity to be valued and utilized

781 by society at large. From this standpoint, the active involvement of urban consumers and new  
782 institutional stakeholders may be key to the ongoing use and conservation of the potato's  
783 intraspecific diversity.

#### 784 **Acknowledgments**

785 The authors thank the smallholder farmers and community authorities of Castillapata,  
786 Huachhua, Pumaranra, Bellavista and Chupaca for collaborating with us and making this  
787 research possible. We are grateful to the local teams of field enumerators who supported us  
788 during the arduous data collection. We also thank the International Potato Center for  
789 facilitating the genebank collection data that enabled our comparative timeline series  
790 analysis.

#### 791 **References**

- 792 1. Oyarzun PJ, Borja RM, Sherwood S, Parra V. Making Sense of Agrobiodiversity,  
793 Diet, and Intensification of Smallholder Family Farming in the Highland Andes of  
794 Ecuador. *Ecol Food Nutr* [Internet]. 2013;52(6):515–41. Available from:  
795 <http://www.tandfonline.com/loi/gefn20>
- 796 2. Zimmerer KS, Vaca HLR. Fine-grain spatial patterning and dynamics of land use  
797 and agrobiodiversity amid global changes in the Bolivian Andes. *Reg Environ*  
798 *Chang*. 2016;16(8):2199–2214.
- 799 3. Kroschel J, Sporleder M, Tonnang HEZ, Juarez H, Carhuapoma P, Gonzales JC, et  
800 al. Predicting climate-change-caused changes in global temperature on potato tuber  
801 moth *Phthorimaea operculella* (Zeller) distribution and abundance using phenology  
802 modeling and GIS mapping. *Agric For Meteorol*. 2013;170(15):228–41.
- 803 4. Skarbø K. The cooked is the kept: Factors shaping the maintenance of agro-

- 804 biodiversity in the Andes. *Hum Ecol.* 2014;42:711–26.
- 805 5. Haller A. The “sowing of concrete”: Peri-urban smallholder perceptions of rural–  
806 urban land change in the Central Peruvian Andes. *Land use policy.* 2014;38:239–47.
- 807 6. Giraldo D, Juarez H, Perez W, Trebejo I, Yzarra W, Forbes G. Severity of the potato  
808 late blight (*Phytophthora infestans*) in agricultural areas of Peru associated with  
809 climate change. *Rev Peru Geo-Atmosferica.* 2010;2:56–67.
- 810 7. Quiroz R, Ramírez DA, Kroschel J, Andrade-Piedra J, Barreda C, Condori B, et al.  
811 Impact of climate change on the potato crop and biodiversity in its center of origin.  
812 *Open Agric.* 2018;3(1):273–83.
- 813 8. Hellin J, Hignman S. Crop Diversity and Livelihood Security in the Andes. *Dev Pract*  
814 [Internet]. 2005;15(2):165–74. Available from: <http://www.jstor.org/stable/4030077>
- 815 9. Aragona FB, Orr B. Agricultural Intensification, Monocultures, and Economic  
816 Failure: The Case of Onion Production in the Tipajara Watershed on the Eastern  
817 Slope of the Bolivian Andes. *J Sustain Agric.* 2011;35(5):467–92.
- 818 10. Rocha JM. Agricultural Intensification, Market Participation, and Household  
819 Demography in the Peruvian Andes. *Hum Ecol* [Internet]. 2011;39(5):555–68.  
820 Available from: <http://www.jstor.org/stable/41474635>
- 821 11. Caulfield M, Bouniol J, Fonte SJ, Kessler A. How rural out-migrations drive  
822 changes to farm and land management: A case study from the rural Andes. *Land use*  
823 *policy.* 2019;81:594–603.
- 824 12. Wieggers ES, Hijmans RJ, Herve D, Fresco LO. Land Use Intensification and

- 825 Disintensification in the Upper Cañete Valley, Peru. *Hum Ecol* [Internet].  
826 1999;27(2):319–39. Available from:  
827 <https://www.researchgate.net/publication/226337903>
- 828 13. Gray CL. Rural out-migration and smallholder agriculture in the southern  
829 Ecuadorian Andes. *Popul Environ*. 2009;30(4):193–217.
- 830 14. Gray CL, Billsborrow RE. Consequences of out-migration for land use in rural  
831 Ecuador. *Land use policy*. 2014;36:182– 191.
- 832 15. Bussink CB, Hijmans RJ. Land-Use Change in the Cajamarca Catchment, Peru,  
833 1975–1996. In: *Scientist and Farmer: Partners in Research for the 21st Century*  
834 *Program Report, 1999-2000* [Internet]. 1st ed. Lima: International Potato Center;  
835 2001. p. 421–8. Available from:  
836 <http://cipotato.org/site/inrm/home/publicat/01cpb009.pdf>
- 837 16. Rolando JL, Dubeux JCB, Ramirez DA, Ruiz-Moreno M, Victor Mares CT,  
838 Sollenberger LE, et al. Land Use Effects on Soil Fertility and Nutrient Cycling in the  
839 Peruvian High-Andean Puna Grasslands. *Soil Sci Soc Am J*. 2018;82(2):463–74.
- 840 17. Postigo JC, Young KR, Crews KA. Change and continuity in a pastoralist  
841 community in the high Peruvian Andes. *Hum Ecol*. 2008;36:535–551.
- 842 18. Tovar C, Seijmonsbergen AC, Duivenvoorden JF. Monitoring land use and land  
843 cover change in mountain regions: An example in the Jalca grasslands of the  
844 Peruvian Andes. *Landsc Urban Plan*. 2013;112:40–9.
- 845 19. Zimmerer KS. The compatibility of agricultural intensification in a global hotspot of  
846 smallholder agrobiodiversity (Bolivia). *PNAS* [Internet]. 2013;110(8):2769–74.

- 847 Available from: <http://www.ecologyandsociety.org/vol19/iss2/art1/>
- 848 20. Skarbø K, Vandermolen K. Maize migration: key crop expands to higher altitudes  
849 under climate change in the Andes. *Clim Dev* [Internet]. 2015;8(3):245–55.  
850 Available from: <http://www.tandfonline.com/>
- 851 21. Taboada C, Garcia M, Gilles J, Pozo O, Yucra E, Rojas K. Can warmer be better?  
852 Changing production systems in three Andean ecosystems in the face of  
853 environmental change. *J Arid Environ*. 2017;147:144–54.
- 854 22. Rolando JL, Turin C, Ramírez DA, Mares V, Moneris J, Quiroz R. Key ecosystem  
855 services and ecological intensification of agriculture in the tropical high-Andean  
856 Puna as affected by land-use and climate changes. *Agric Ecosyst Environ*.  
857 2017;236(2):221–33.
- 858 23. Baldinelli GM. Agrobiodiversity Conservation as a Coping Strategy: Adapting to  
859 Climate Change in the Northern Highlands of Bolivia. *Consilience* [Internet].  
860 2014;11(1):153–66. Available from: <http://www.jstor.org/stable/26188735>
- 861 24. Zimmerer KS, De Haan S. Agrobiodiversity and a sustainable food future. *Nat*  
862 *Plants*. 2017;3(Article number: 17047):1–3.
- 863 25. Jakovac CC, Dutrieux LP, Siti L, Peña-Claros M, Bongers F. Spatial and temporal  
864 dynamics of shifting cultivation in the middle-Amazonas river: Expansion and  
865 intensification. *PLoS One*. 2017;12(7):e0181092.
- 866 26. Mensah-Bonsu A, Sarpong DB, Al-Hassan R, Egyir IS, Asuming-Brempong S,  
867 Egyir IS, et al. Intensity of and factors affecting land and water management  
868 practices among smallholder maize farmers in Ghana. *African J Agric Resour Econ*



- 869 [Internet]. 2017;12(2):142–57. Available from:  
870 <https://www.researchgate.net/publication/318278130>
- 871 27. Junqueira AB, Almekinders CJM, Stomph TJ, Clement CR, Struik PC. The role of  
872 Amazonian anthropogenic soils in shifting cultivation: Learning from farmers’  
873 rationales. *Ecol Soc*. 2016;21(1):12.
- 874 28. Roy Chowdhury R. Differentiation and concordance in smallholder land use  
875 strategies in southern Mexico’s conservation frontier. *Proc Natl Acad Sci*.  
876 2010;107(13):5780–5785.
- 877 29. Perez C, Nicklin C, Dangles O, Vanek S, Sherwood S, Halloy S, et al. Climate  
878 Change in the High Andes: Implications and Adaptation Strategies for Small-scale  
879 Farmers. *Int J Environ Cult Econ Soc Sustain* [Internet]. 2010;6:1–21. Available  
880 from: [www.sustainability-journal.com](http://www.sustainability-journal.com)
- 881 30. De Haan S, Juárez H. Land use and potato genetic resources in Huancavelica, central  
882 Peru. *J Land Use Sci* [Internet]. 2010;5(3):179–95. Available from:  
883 <http://dx.doi.org/10.1080/1747423X.2010.500681>
- 884 31. Parsa S. Native Herbivore Becomes Key Pest After Dismantlement of a Traditional  
885 Farming System. *Am Entomol*. 2010;56(4):242–51.
- 886 32. Lozada C. Overgrazing and Range Degradation in the Peruvian Andes. *Rangelands*  
887 [Internet]. 1991;13(2):64–7. Available from: <http://www.jstor.org/stable/4000493>
- 888 33. Chiriboga Vega M. Pequeñas economías: reflexiones sobre la agricultura familiar  
889 campesina [Internet]. Quito, Ecuador: Food and Agriculture Organization (FAO);  
890 2015. 432 p. Available from: [www.fao.org/publications](http://www.fao.org/publications)

- 891 34. Maletta H. La pequeña agricultura familiar en el Perú. Una tipología  
892 microrregionalizada. Lima, Perú: Organización de las Naciones Unidas para la  
893 Alimentación y la Agricultura (FAO); 2017. 208 p.
- 894 35. Brush SB, Taylor JE, Bellon MR. Technology adoption and biological diversity in  
895 Andean potato agriculture. *J Dev Econ.* 1992;39(2):365–87.
- 896 36. Mayer E, Glave M. “Alguito para ganar” (A Little Something to Earn): Profits and  
897 Losses in Peasant Economies. *Am Ethnol* [Internet]. 1999;26(2):344–69. Available  
898 from: <http://www.jstor.org>
- 899 37. Young KR. Andean land use and biodiversity: humanized landscapes in a time of  
900 change. *Ann Missouri Bot Gard* [Internet]. 2009;96(3):492–507. Available from:  
901 <http://dx.doi.org/10.3417/2008035>
- 902 38. Oswald A, De Haan S, Sanchez J, Ccanto R. The complexity of simple tillage  
903 systems. *J Agric Sci.* 2009;147:399–410.
- 904 39. Goland C. Field Scattering as Agricultural Risk Management: A Case Study from  
905 Cuyo Cuyo, Department of Puno, Peru. *Mt Res Dev.* 1993;13(4):317–38.
- 906 40. Condori B, Hijmans RJ, Ledent JF, Quiroz R, Liu JH. Managing Potato Biodiversity  
907 to Cope with Frost Risk in the High Andes: A Modeling Perspective. *PLoS One.*  
908 2014;9(1):e81510.
- 909 41. Coca-Morante M, Tolín-Tordoya I. The Potato Late Blight Caused by *Phytophthora*  
910 *infestans* Mont de Bary as Selection Factor of Phurejas Potatoes (*Solanum phureja*  
911 *Juz et Buk*) in Endemic Areas of the Bolivian Andes. *Am J Plant Sci.* 2013;4(1):53–  
912 8.

- 913 42. Poveda K, Martínez E, Kersch-Becker MF, Bonilla MA, Tschardt T. Landscape  
914 simplification and altitude affect biodiversity, herbivory and Andean potato yield. *J*  
915 *Appl Ecol.* 2012;49(2):513–22.
- 916 43. Orlove BS, Godoy R. Sectoral fallowing systems in the Central Andes. *J Ethnobiol.*  
917 1986;6(1):169–204.
- 918 44. Kraft KE. Community Land Management in the Andean Context: The Sectoral  
919 Fallowing System. Master thesis. Davis: University of California Davis; 1988. 162 p.
- 920 45. Mayer E. Land use in the Andes: Ecology and agriculture in the Mantaro Valley of  
921 Peru, with special reference to potatoes. Lima, Perú: International Potato Center  
922 (CIP). Social Science Unit; 1979. 115 p.
- 923 46. Pestalozzi H. Sectoral Fallow Systems and the Management of Soil Fertility: The  
924 Rationality of Indigenous Knowledge in the High Andes of Bolivia. *Mt Res Dev.*  
925 2000;20(1):64–71.
- 926 47. Godoy R. The Evolution of Common-Field Agriculture in the Andes: A Hypothesis.  
927 *Comp Stud Soc Hist.* 1991;33(2):395–414.
- 928 48. Zimmerer KS. Common field agriculture as a cultural landscape of Latin America:  
929 Development and history in the geographical customs of resource use. *J Cult Geogr.*  
930 2002;19(2):37–63.
- 931 49. Ovchinnikova A, Krylova E, Gavrilenko T, Smekalova T, Zhuk M, Knapp S, et al.  
932 Taxonomy of cultivated potatoes (*Solanum* section *Petota*: Solanaceae). *Bot J Linn*  
933 *Soc.* 2011;165:107–55.

- 934 50. Spooner DM, Nuñez J, Trujillo G, del Rosario Herrera M, Guzman F, Ghislain M.  
935 Extensive simple sequence repeat genotyping of potato landraces supports a major  
936 reevaluation of their gene pool structure and classification. *Proc Natl Acad Sci*.  
937 2007;104(49):19398–19403.
- 938 51. Brush SB. *Farmers' bounty: locating crop diversity in the contemporary world*. New  
939 Haven & London: Yale University Press; 2004. 327 p.
- 940 52. Zimmerer KS, Douches DS. Geographical Approaches to Crop Conservation: The  
941 Partitioning of Genetic Diversity in Andean Potatoes. *Econ Bot*. 1991;45(2):176–89.
- 942 53. De Haan S, Rodriguez F. Potato Origin and Production. In: Singh J, Kaur L, editors.  
943 *Advances in Potato Chemistry and Technology*: 2nd ed. London: Elsevier Inc.; 2016.  
944 p. 1–32.
- 945 54. De Haan S, Nuñez J, Bonierbale M, Ghislain M. Multilevel Agrobiodiversity and  
946 Conservation of Andean Potatoes in Central Peru: Species, Morphological, Genetic,  
947 and Spatial Diversity. *Mt Res Dev* [Internet]. 2010;30(3):222–31. Available from:  
948 <http://www.jstor.org/stable/mounresedeve.30.3.222>
- 949 55. Zimmerer KS. *Changing Fortunes: Biodiversity and Peasant Livelihood in the*  
950 *Peruvian Andes*. Berkeley and Los Angeles: University of California Press; 1996.  
951 309 p.
- 952 56. De Haan S. *Potato diversity at height: Multiple dimensions of farmer-driven in-situ*  
953 *conservation in the Andes*. PhD thesis. Wageningen: Wageningen University; 2009.  
954 245 p.
- 955 57. Arce A, de Haan S, Burra DD, Ccanto R. *Unearthing Unevenness of Potato Seed*

- 956 Networks in the High Andes: A Comparison of Distinct Cultivar Groups and Farmer  
957 Types Following Seasons With and Without Acute Stress. *Front Sustain Food Syst.*  
958 2018;2(43):1–22.
- 959 58. De Haan S, Burgos G, Arcos J, Ccanto R, Scurrah M, Salas E, et al. Traditional  
960 Processing of Black and White Chuño in the Peruvian Andes: Regional Variants and  
961 Effect on the Mineral Content of Native Potato Cultivars. *Econ Bot.*  
962 2010;64(3):217–234.
- 963 59. De Haan S, Polreich S, Rodriguez F, Juarez H, Plasencia F, Ccanto R, et al. A Long-  
964 term Systematic Monitoring Framework for On-farm Conserved Potato Landrace  
965 Diversity. In: Maxted N, Dulloo ME, Ford-Lloyd BV, editors. *Enhancing Crop*  
966 *Genepool Use: Capturing Wild Relative and Landrace Diversity for Crop*  
967 *Improvement* [Internet]. Boston: CABI International; 2016. p. 289–96. Available  
968 from: <https://www.researchgate.net/publication/320620083>
- 969 60. Zevallos EL, Villaorduña LF, Castillo HJ, Cristóbal MA, Álvarez FJ, Gonzales RA,  
970 et al. *Colección, evaluación y conservación de papas nativas de la Región Pasco.*  
971 Cerro de Pasco; 2011.
- 972 61. R Core Team. *R: A language and environment for statistical computing* [Internet].  
973 Vienna, Austria: R Foundation for Statistical Computing; 2017. Available from:  
974 <https://www.r-project.org/>
- 975 62. Kuhn M. *caret: Classification and Regression Training* [Internet]. CRAN R-project.  
976 2017 [cited 2018 Jan 21]. Available from: <https://cran.r-project.org/package=caret>
- 977 63. Wickham H. *ggplot2*. *Wiley Interdiscip Rev Comput Stat.* 2011;3(2):180–5.

- 978 64. Meyer D, Zeileis A, Hornik K, Gerber F, Friendly M. vcd: Visualizing Categorical  
979 Data [Internet]. CRAN R-project. 2017 [cited 2018 Jan 21]. Available from:  
980 <https://cran.r-project.org/package=vcd>
- 981 65. Ritschard G, Bürgin R, Studer M. Exploratory Mining of Life Event Histories. In:  
982 J.J. McArdle, G. Ritschard, editors. Contemporary Issues in Exploratory Data  
983 Mining in the Behavioral Sciences. New York: Routledge Taylor & Francis Group;  
984 2014. p. 221–53.
- 985 66. Parsa S. Explaining the Dismantlement of Indigenous Pest Management in the  
986 Andes. PhD thesis. Davis: University of California Davis; 2009. 91 p.
- 987 67. Scurrah M, de Haan S, Olivera E, Ccanto R, Creed H, Carrasco M, et al. Ricos en  
988 agrobiodiversidad pero pobres en nutrición: Desafíos de la mejora de la seguridad  
989 alimentaria en comunidades de Chopcca, Huancavelica. In: R.H. Asensio, F. Eguren,  
990 M. Ruiz, editors. Perú: El Problema Agrario en Debate SEPIA XIV [Internet]. Lima:  
991 Seminario Permanente de Investigación Agraria (SEPIA); 2012. p. 362–407.  
992 Available from: <http://www.sepia.org.pe/facipub/upload/cont/1207/cont/files/Maria>  
993 [Scurrah.pdf](#)
- 994 68. Oduol JBA, Tsuji M. The effect of farm size on agricultural intensification and  
995 resource allocation decisions: Evidence from smallholder farms in Embu District,  
996 Kenya. J Fac Agric Kyushu Univ [Internet]. 2005;50(2):727–42. Available from:  
997 <http://hdl.handle.net/2324/4683>
- 998 69. Radel C, Schmook B, Chowdhury RR. Agricultural livelihood transition in the  
999 southern Yucatán region: Diverging paths and their accompanying land changes.

- 1000 Reg Environ Chang. 2010;10(3):205–218.
- 1001 70. Zimmerer KS, Carney JA, Vanek SJ. Sustainable smallholder intensification in  
1002 global change? Pivotal spatial interactions, gendered livelihoods, and  
1003 agrobiodiversity. *Curr Opin Environ Sustain*. 2015;14:49–60.
- 1004 71. Gade DW, Rios R. Chaquitacla – the native footplough and its persistence in  
1005 Central Andean Agriculture. *Tools and Tillage*. 1972;3:3–15.
- 1006 72. Pérez W, Ñahui M, Ellis D, Forbes GA. Wide Phenotypic Diversity for Resistance to  
1007 *Phytophthora infestans* Found in Potato Landraces from Peru. *Plant Dis*.  
1008 2014;98(11):1530–3.
- 1009 73. Garrett KA, Nelson RJ, Mundt CC, Chacón G, Jaramillo RE, Forbes GA. The effects  
1010 of host diversity and other management components on epidemics of potato late  
1011 blight in the humid highland tropics. *Phytopathology*. 2001;91(10):993–1000.
- 1012 74. Parsa S, Ccanto R, Rosenheim JA. Resource concentration dilutes a key pest in  
1013 indigenous potato agriculture. *Ecol Appl*. 2011;21(2):539–46.
- 1014 75. Fonte SJ, Vanek SJ, Oyarzun P, Parsa S, Quintero DC, Rao IM, et al. Pathways to  
1015 Agroecological Intensification of Soil Fertility Management by Smallholder Farmers  
1016 in the Andean Highlands. In: Donald L. Sparks, editor. *Advances in Agronomy*.  
1017 Burlington: Elsevier Inc. Academic Press; 2012. p. 125–84.
- 1018 76. Gilles JL, Thomas JL, Valdivia C, Yucra ES. Laggards or Leaders: Conservers of  
1019 Traditional Agricultural Knowledge in Bolivia. *Rural Sociol*. 2013;78(1):51–74.
- 1020 77. Fu Y, Brookfield H, Guo H, Chen J, Chen A, Cui J. Smallholder rubber plantation

- 1021 expansion and its impact on local livelihoods, land use and agrobiodiversity, a case  
1022 study from Daka, Xishuangbanna, southwestern China. *Int J Sustain Dev World*  
1023 *Ecol.* 2009;16(1):22–9.
- 1024 78. Hettig E. *Agricultural Transformation and Land-Use Change. Evidence on Causes*  
1025 *and Impacts from Indonesia.* PhD thesis. Georg-August Universitat Gottingen; 2017.
- 1026 79. Wickramasinghe U. *Production Specialization and Market Participation of*  
1027 *Smallholder Agricultural Households in Developing Countries.* In: Arsenio M.  
1028 Balisacan, Ujjayant Chakravorty, Majah-Leah V. Ravago, editors. *Sustainable*  
1029 *Economic Development: Resources, Environment, and Institutions.* Cambridge,  
1030 Massachusetts: Academic Press; 2015. p. 349–67.
- 1031 80. Brush SB. *Ethnoecology, Biodiversity, and Modernization in Andean Potato*  
1032 *Agriculture.* *J Ethnobiol.* 1992;12(2):161–85.
- 1033 81. Van Dusen ME, Taylor JE. *Missing markets and crop diversity: evidence from*  
1034 *Mexico.* *Environ Dev Econ.* 2005;10(4):513–31.
- 1035 82. Rana RB, Garforth C, Sthapit B, Jarvis D. *Influence of socio-economic and cultural*  
1036 *factors in rice varietal diversity management on-farm in Nepal.* *Agric Human*  
1037 *Values.* 2007;24(4):461–472.
- 1038 83. De Haan S, Burgos G, Liria R, Rodriguez F, Creed-Kanashiro HM, Bonierbale M.  
1039 *The Nutritional Contribution of Potato Varietal Diversity in Andean Food Systems: a*  
1040 *Case Study.* *Am J Potato Res.* 2019;1–13.
- 1041 84. Bertschinger L. *Modelling of Potato Virus Pathosystems by Means of Quantitative*  
1042 *Epidemiology: An Exemplary Case Based on Virus Degeneration Studies in Peru.*



- 1043 PhD thesis. Zurich, Switzerland: Swiss Federal Institute of Technology; 1992. 110 p.
- 1044 85. Thomas-Sharma S, Abdurahman A, Ali S, Andrade-Piedra JL, Bao S, Charkowski  
1045 AO, et al. Seed degeneration in potato: the need for an integrated seed health strategy  
1046 to mitigate the problem in developing countries. *Plant Pathol.* 2015;65(1):3–16.
- 1047 86. Buddenhagen CE, Hernandez Nopsa JF, Andersen KF, Andrade-Piedra J, Forbes  
1048 GA, Kromann P, et al. Epidemic Network Analysis for Mitigation of Invasive  
1049 Pathogens in Seed Systems: Potato in Ecuador. *Phytopathology.*  
1050 2017;107(10):1209–18.
- 1051 87. Urrea-Hernandez C, Almekinders CJM, van Dam YK. Understanding perceptions of  
1052 potato seed quality among small-scale farmers in Peruvian highlands. *NJAS -*  
1053 *Wageningen J Life Sci* [Internet]. 2016;76:21–8. Available from:  
1054 <http://dx.doi.org/10.1016/j.njas.2015.11.001>
- 1055 88. Zimmerer KS. Overlapping Patchworks of Mountain Agriculture in Peru and  
1056 Bolivia: Toward a Regional-Global Landscape Model. *Hum Ecol.* 1999;27(1):135–  
1057 65.
- 1058 89. De Haan S, Burgos G, Liria R, Bonierbale M, Thiele G. The role of biodiverse  
1059 potatoes in the human diet in central Peru: nutritional composition, dietary intake  
1060 and cultural connotations. In: *Potato diversity at height: Multiple dimensions of*  
1061 *farmer-driven in-situ conservation in the Andes.* Wageningen: Wageningen  
1062 University; 2009. p. 161–82.
- 1063 90. Burgos G, De Haan S, Salas E, Bonierbale M. Protein, iron, zinc and calcium  
1064 concentrations of potatoes following traditional processing as “chuño”. *J Food*

- 1065 Compos Anal [Internet]. 2009;22:617–619. Available from:  
1066 [www.elsevier.com/locate/jfca](http://www.elsevier.com/locate/jfca)
- 1067 91. Zimmerer KS. The Ecogeography of Andean Potatoes. Versatility in farm regions  
1068 and fields can aid sustainable development. *Bioscience*. 1998;48(6):445–54.
- 1069 92. Silva Y, Takahashi K, Cruz N, Trasmonte G, Mosquera K, Nickl E, et al. Variability  
1070 and Climate Change in the Mantaro River Basin, Central Peruvian Andes. In:  
1071 Proceedings of 8th ICSHMO, Foz do Iguaçu, Brazil, April 24-28, 2006, INPE. Foz  
1072 do Iguaçu, Brazil; 2006. p. 407–19.
- 1073 93. Instituto Geofísico del Perú. Vulnerabilidad Actual y Futura ante el Cambio  
1074 Climático y Medidas de Adaptación en la Cuenca del Río Mantaro. CONAM -  
1075 Consejo Nacional del Ambiente, editor. Lima, Perú: Fondo Editorial del CONAM;  
1076 2005. 104 p.
- 1077 94. Martínez AG, Núñez E, Silva Y, Takahashi K, Trasmonte G, Mosquera K, et al.  
1078 Vulnerability and Adaptation to Climate Change in the Peruvian Central Andes:  
1079 Results of a Pilot Study. In: Proceedings of 8th ICSHMO, Foz do Iguaçu, Brazil,  
1080 April 24-28, 2006, INPE. Foz do Iguaçu, Brazil; 2006. p. 297–305.
- 1081 95. Dangles O, Carpio C, Barragan AR, Zeddani J-L, Silvain J-F. Temperature as a Key  
1082 Driver of Ecological Sorting among Invasive Pest Species in the Tropical Andes.  
1083 *Ecol Appl*. 2008;18(7):1795–809.
- 1084 **S1. Fig. Independence analysis (based on chi square statistical testing of Pearson**  
1085 **residuals) of the top most differentiating variables between intermediate and high-**  
1086 **altitude fields in the Huancavelica and Pasco landscapes. A) Production end use, B)**

1087 Tillage type, C) Cultivar combination (NF=Native-floury; NB=Native-bitter; BR=Bred;  
1088 Mixed=combinations of NF, NB and BR) show that intermediate-range fields in  
1089 Huancavelica were associated with production for consumption, *chacmeo* and *barbecho*  
1090 tillage, and mixed-cultivar groups of floury and bitter landraces compared to fields in Pasco;  
1091 D) Fallowing sector association, E) Production end use, F) and Fallowing rates show that  
1092 high-range fields in Huancavelica were not associated with a fallowing sector, production  
1093 end use was destined to consumption, and fallowing rates were significantly lower compared  
1094 to their homologues in Pasco. The scale corresponds to Pearson residuals and the color on  
1095 the scale corresponds to a significantly positive (blue) or significantly negative (red)  
1096 relationship based on independence analysis at p-value < 0.05.  
1097

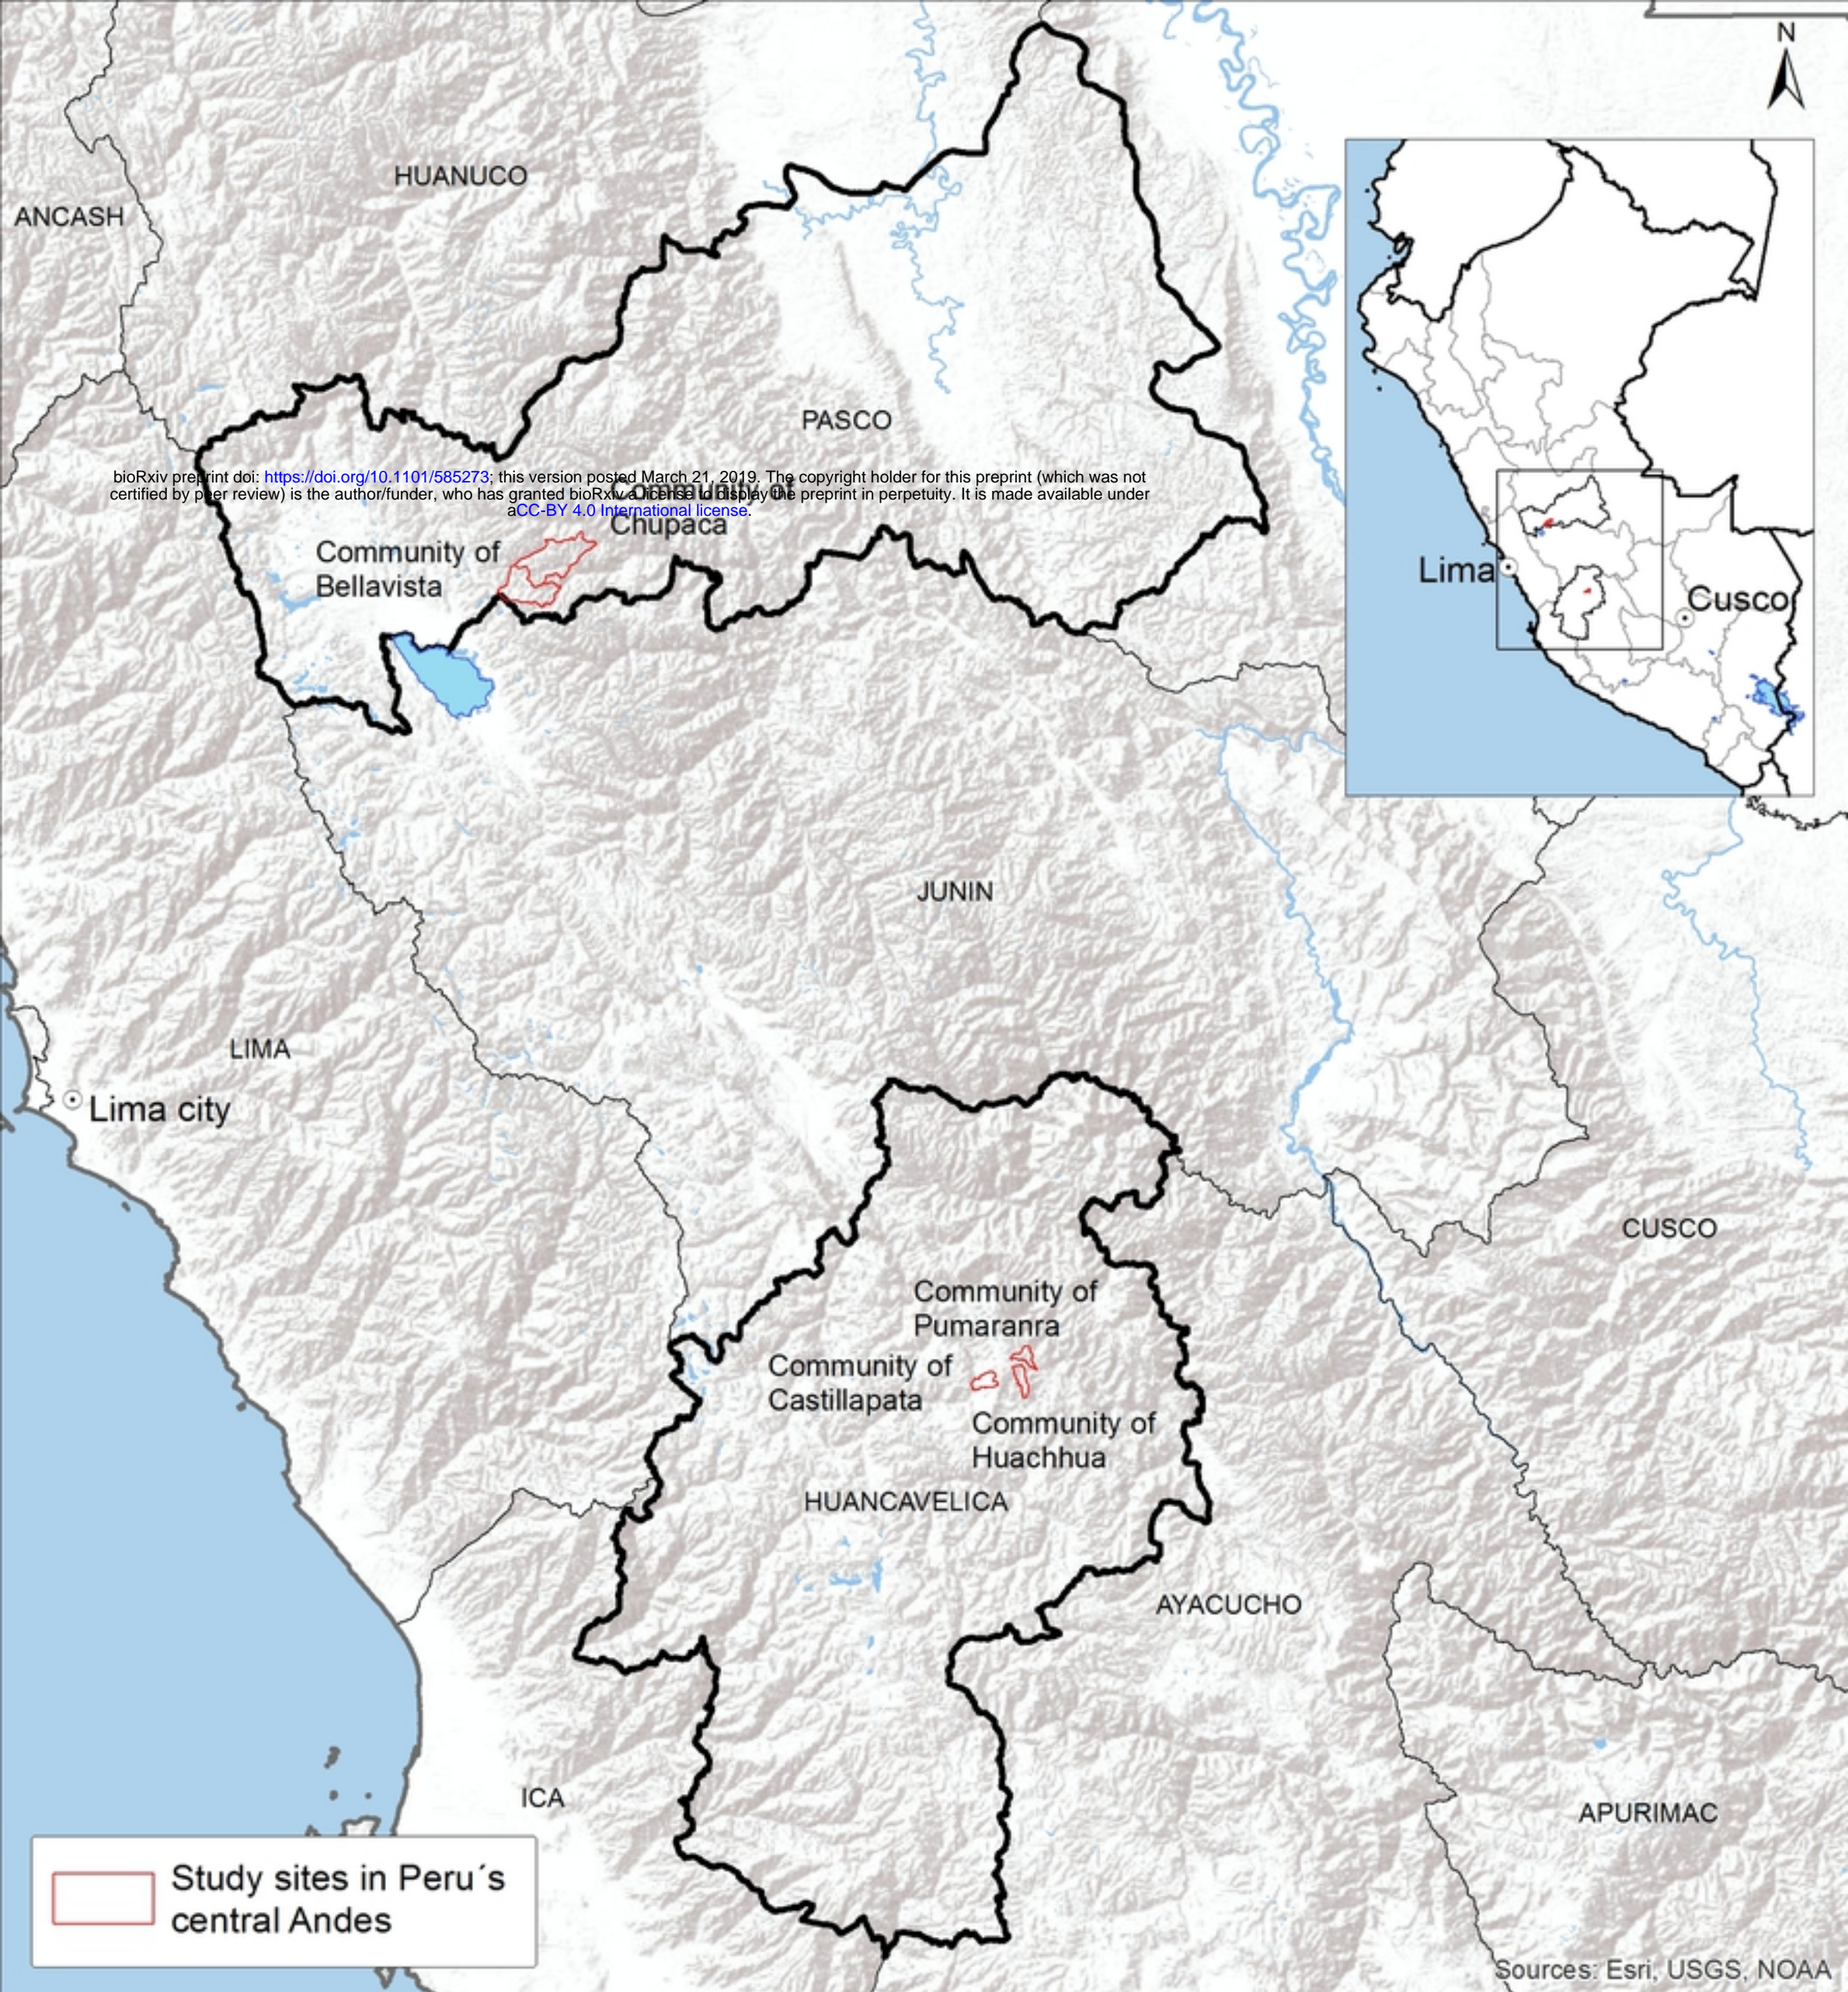

Figure 1

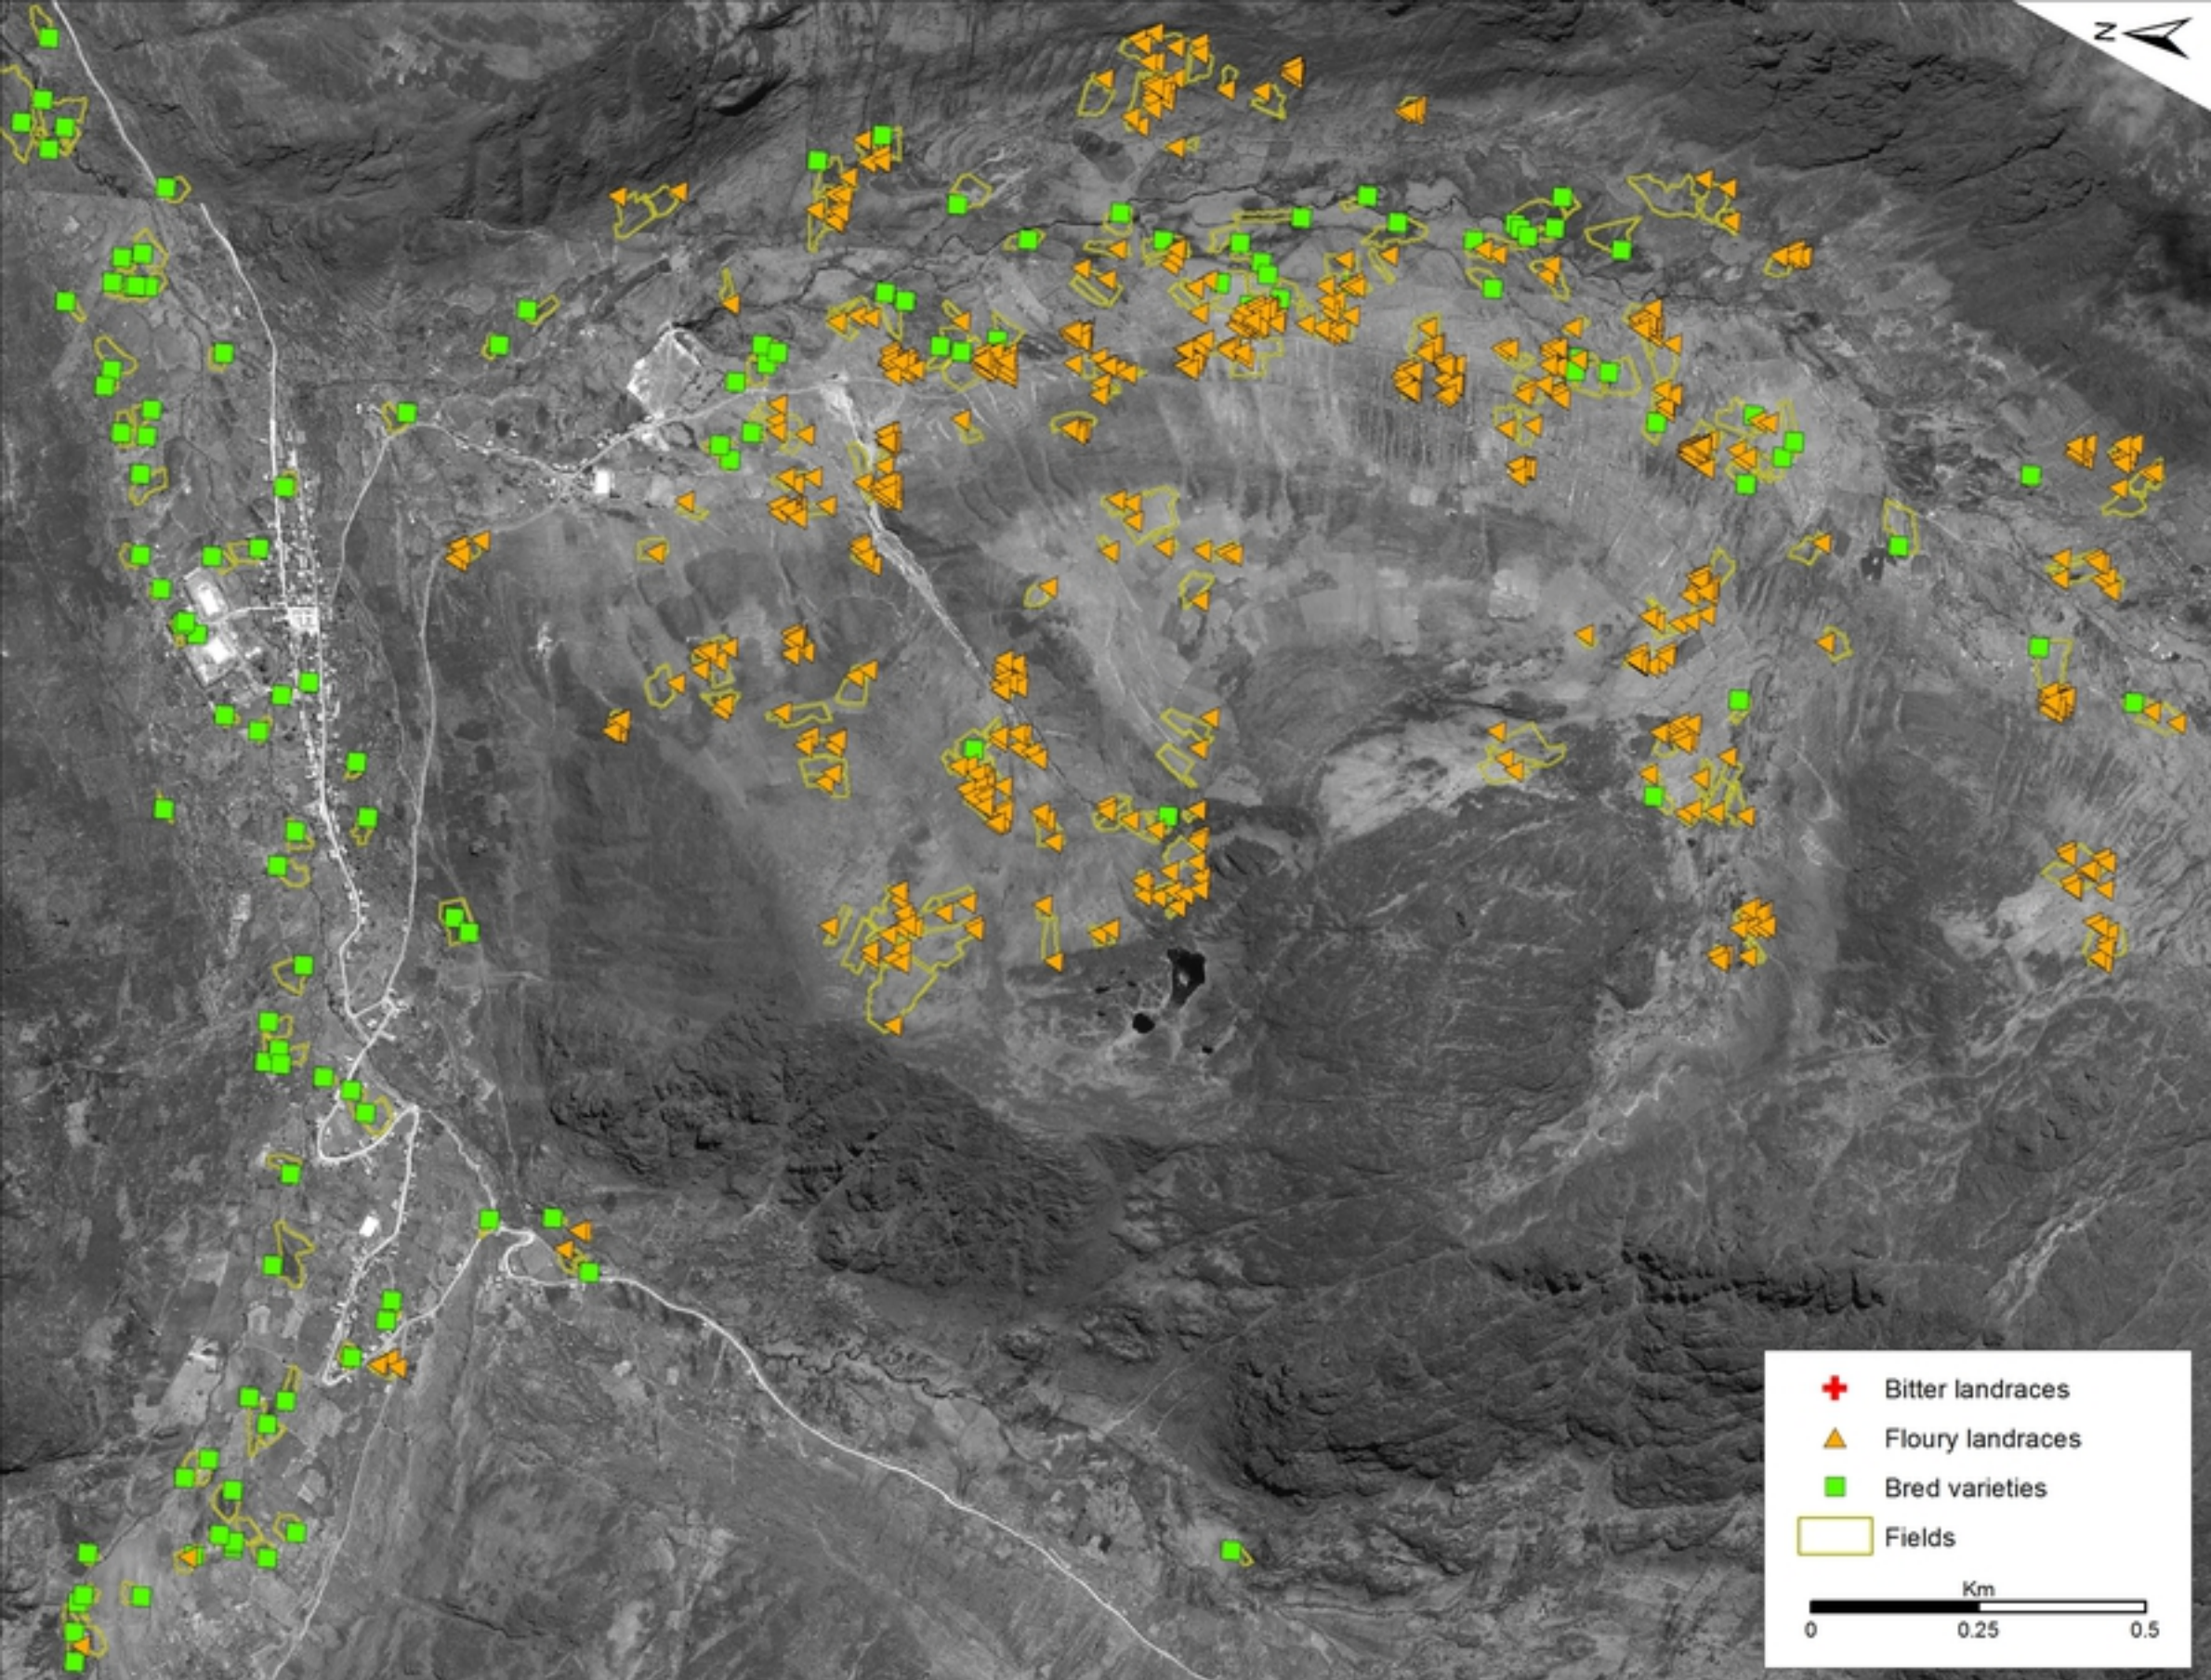

Figure 2A

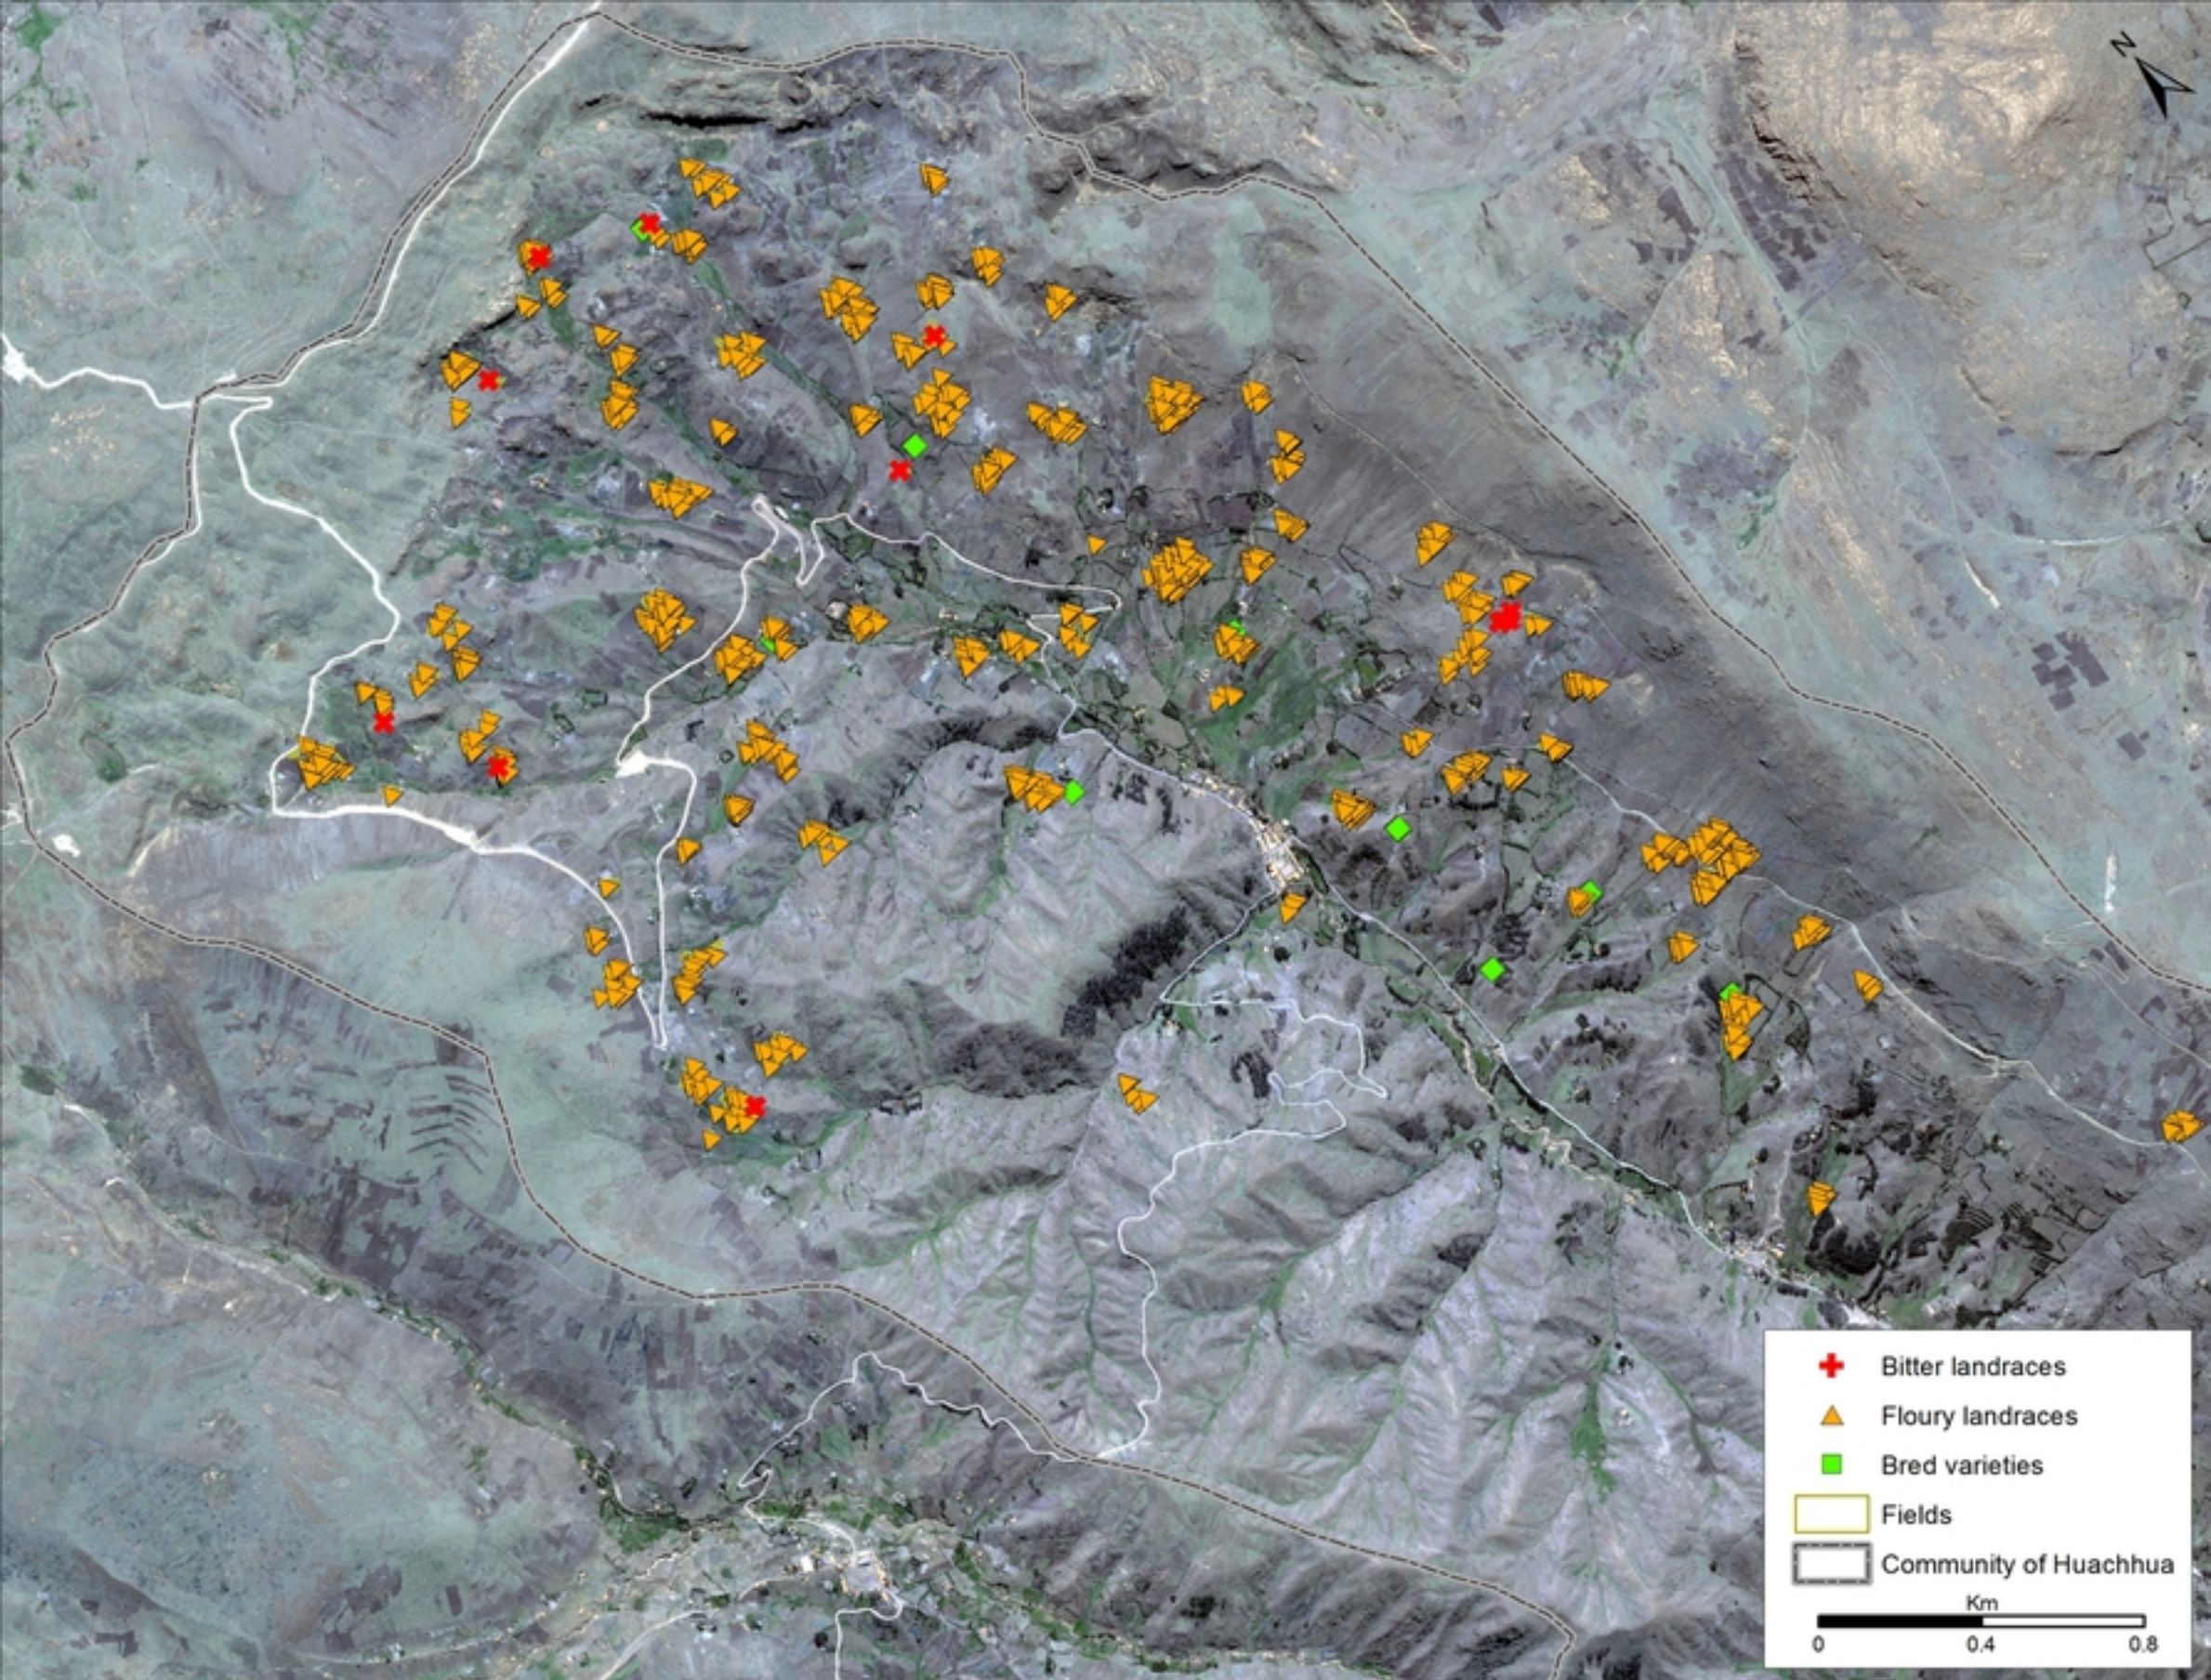

Figure 2B

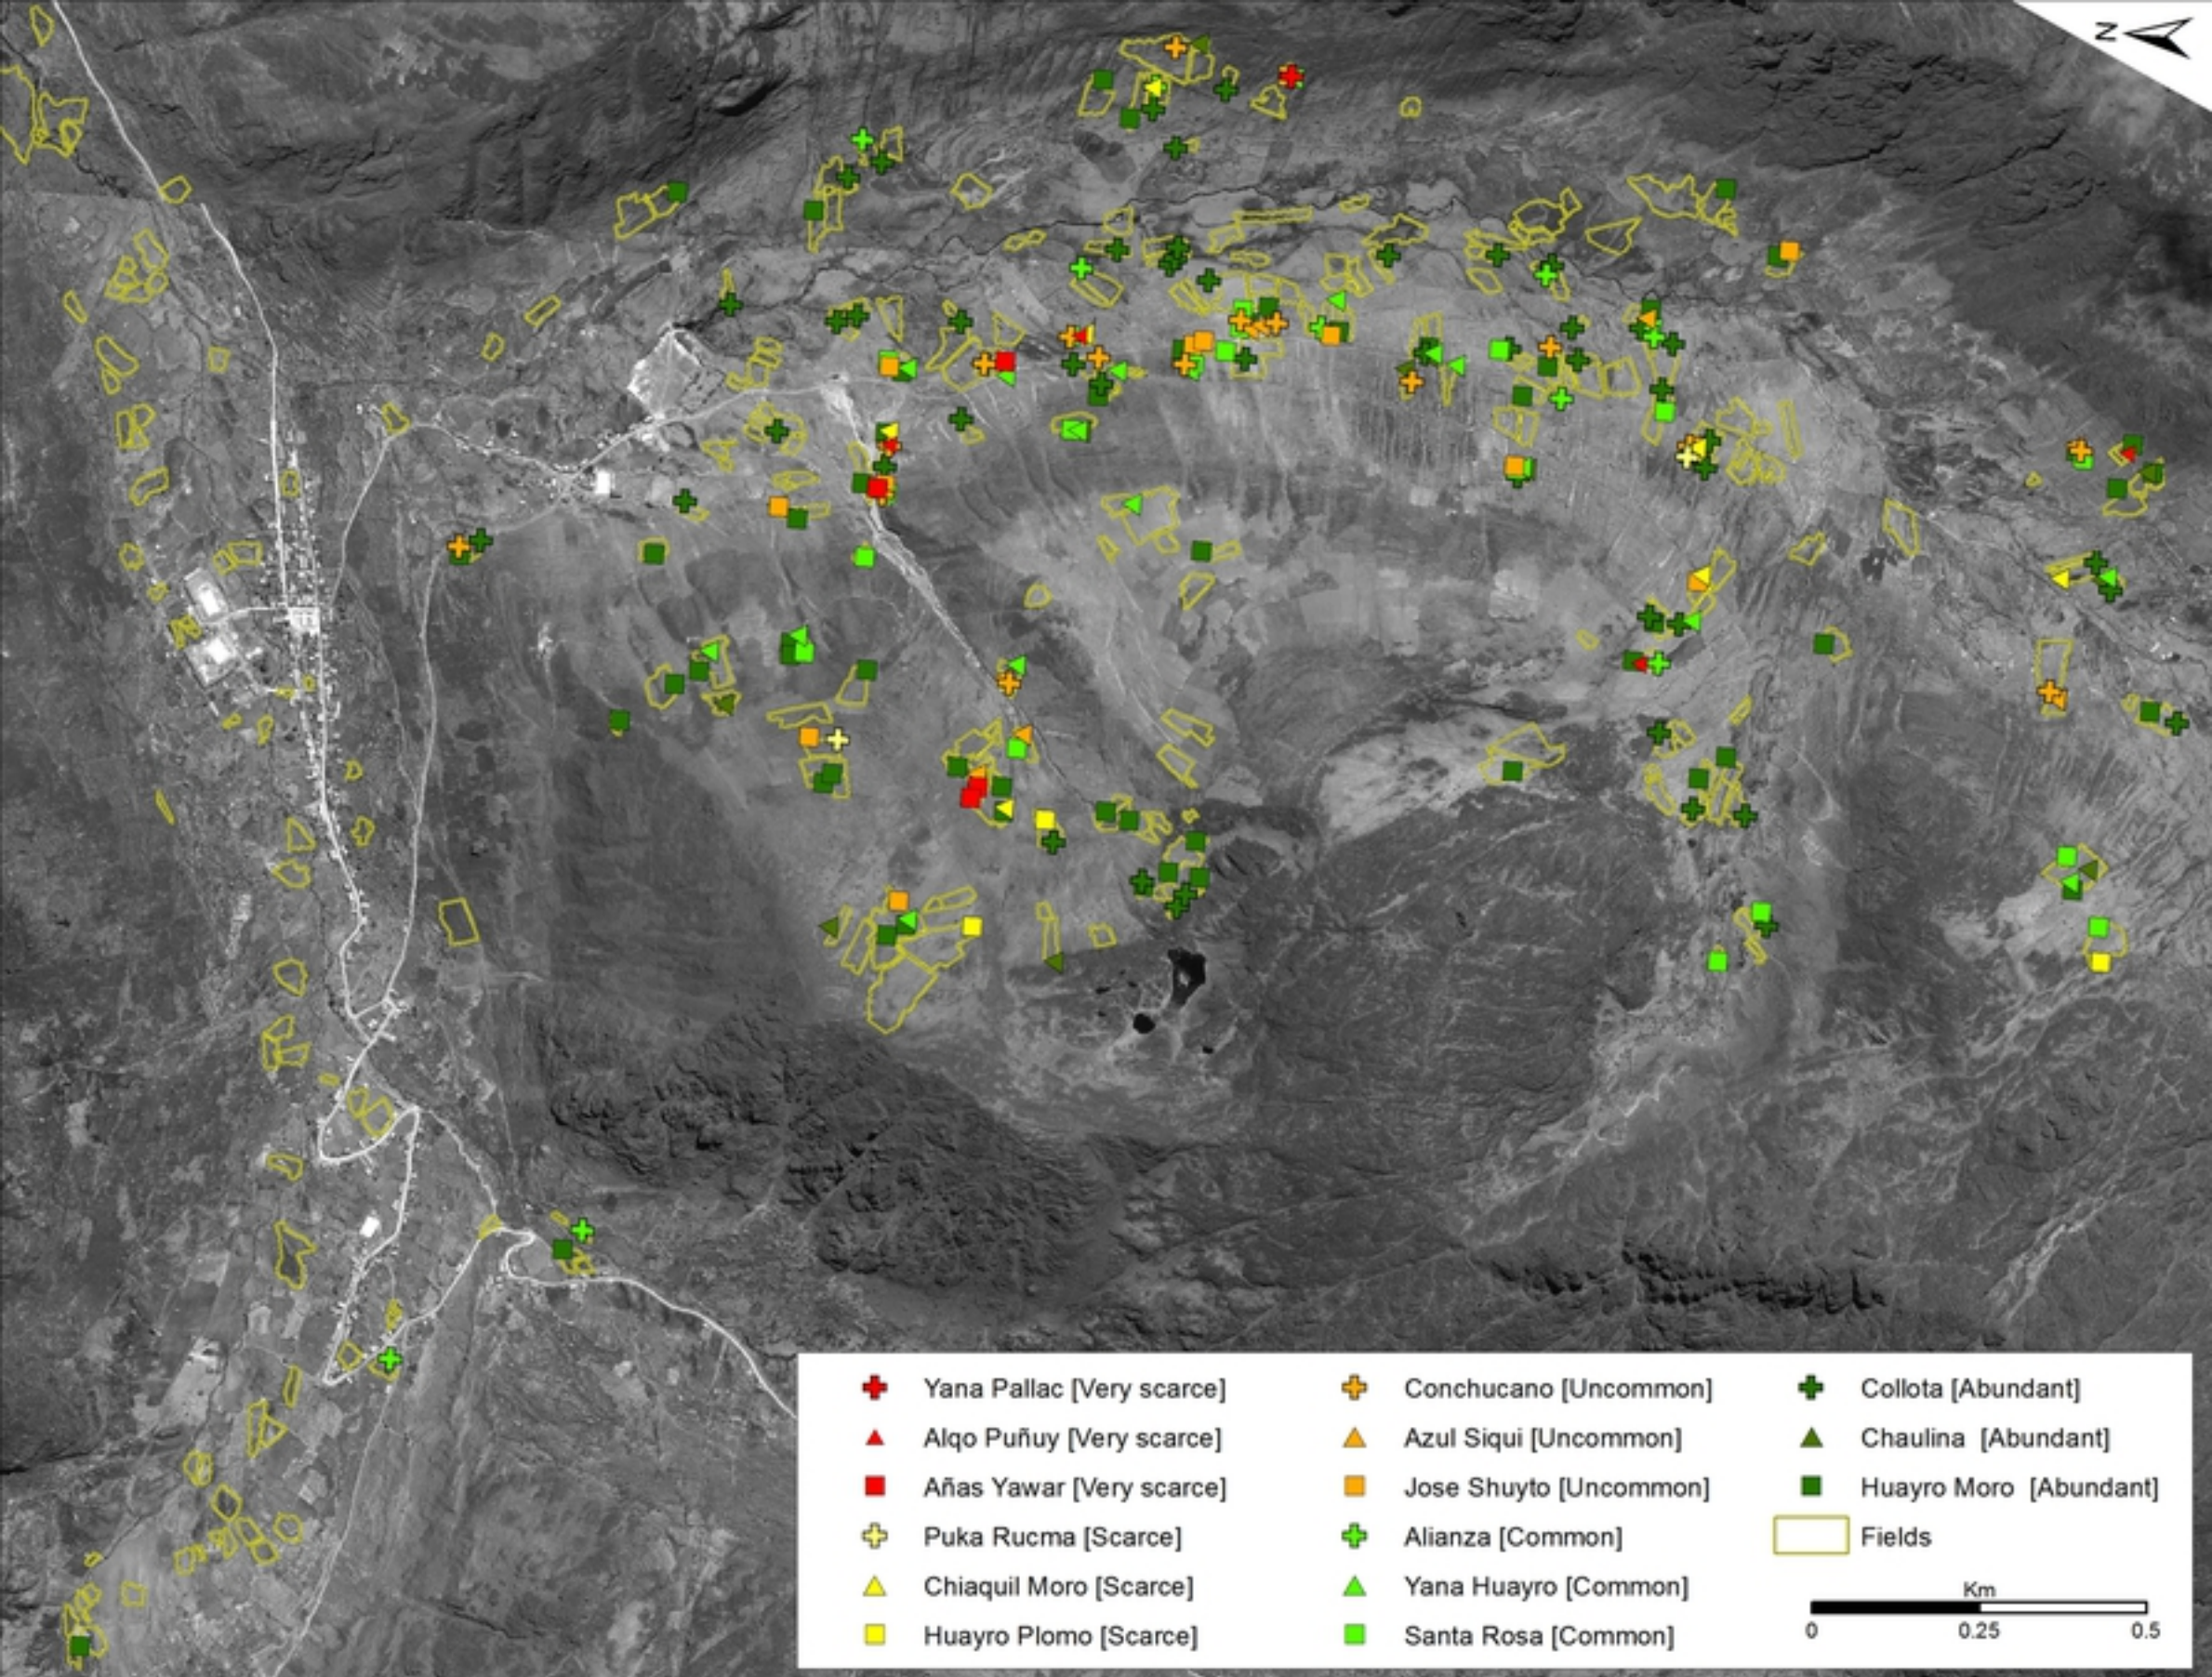

Figure 3A

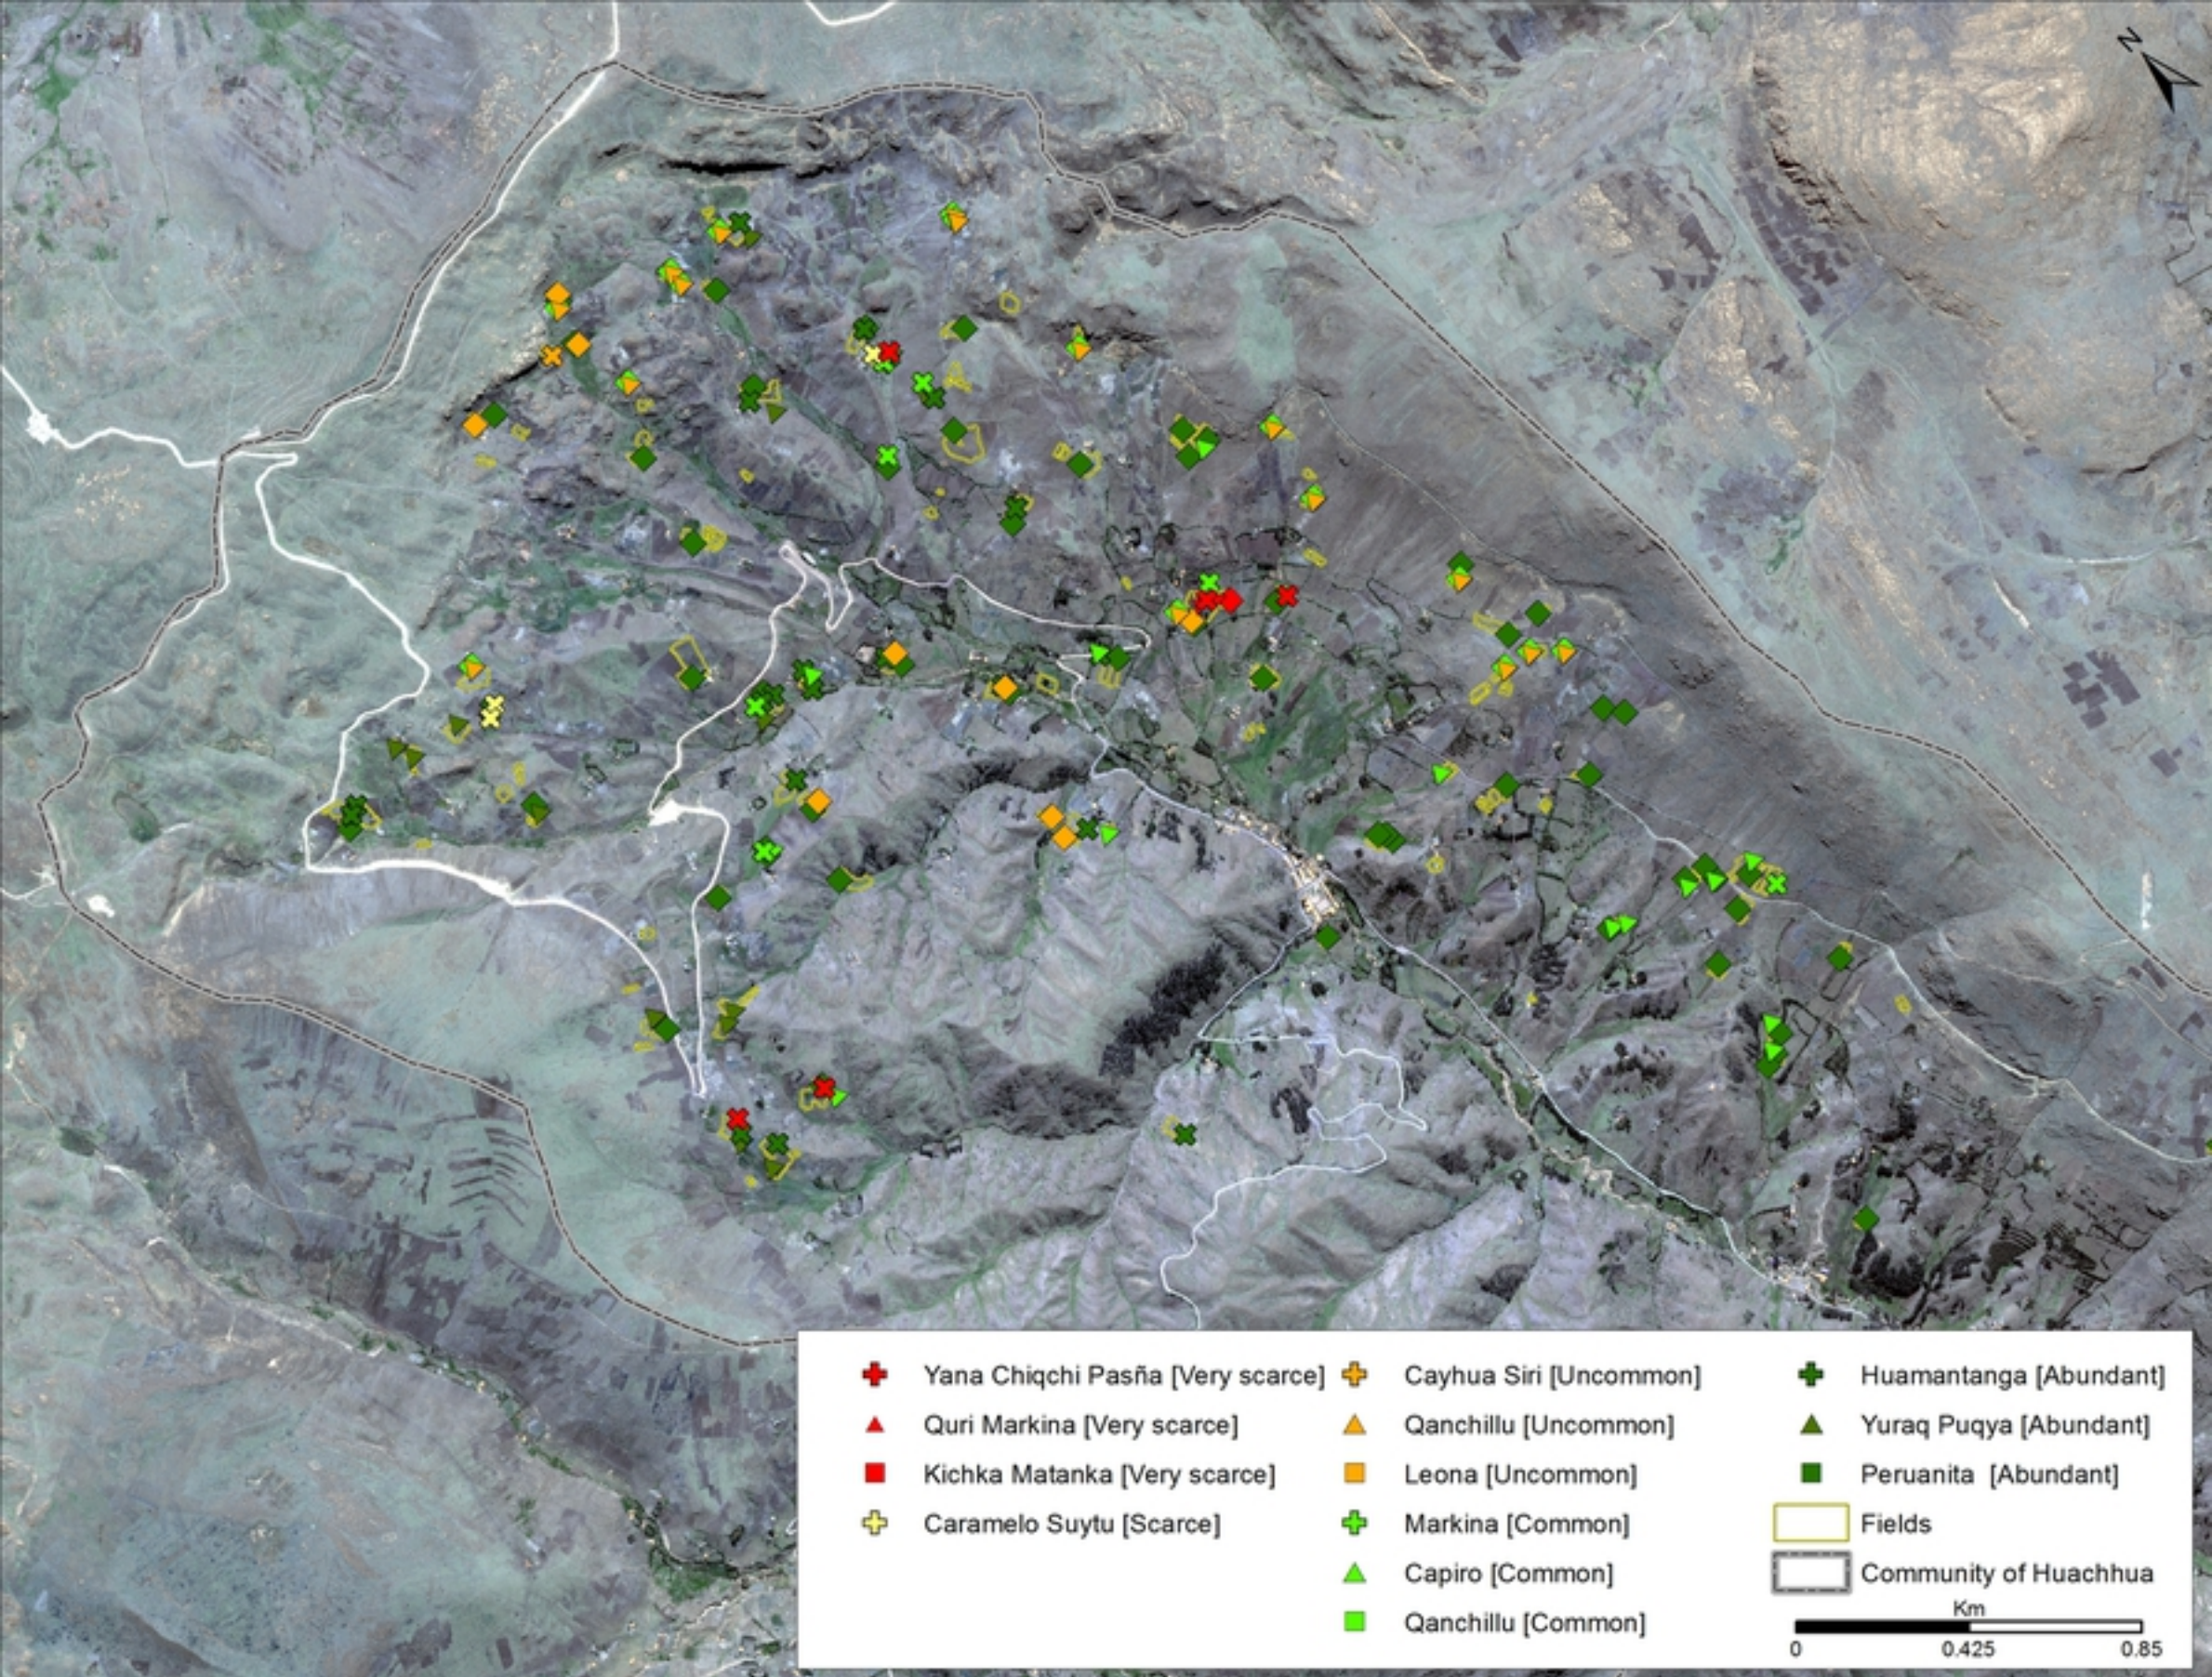

Figure 3B



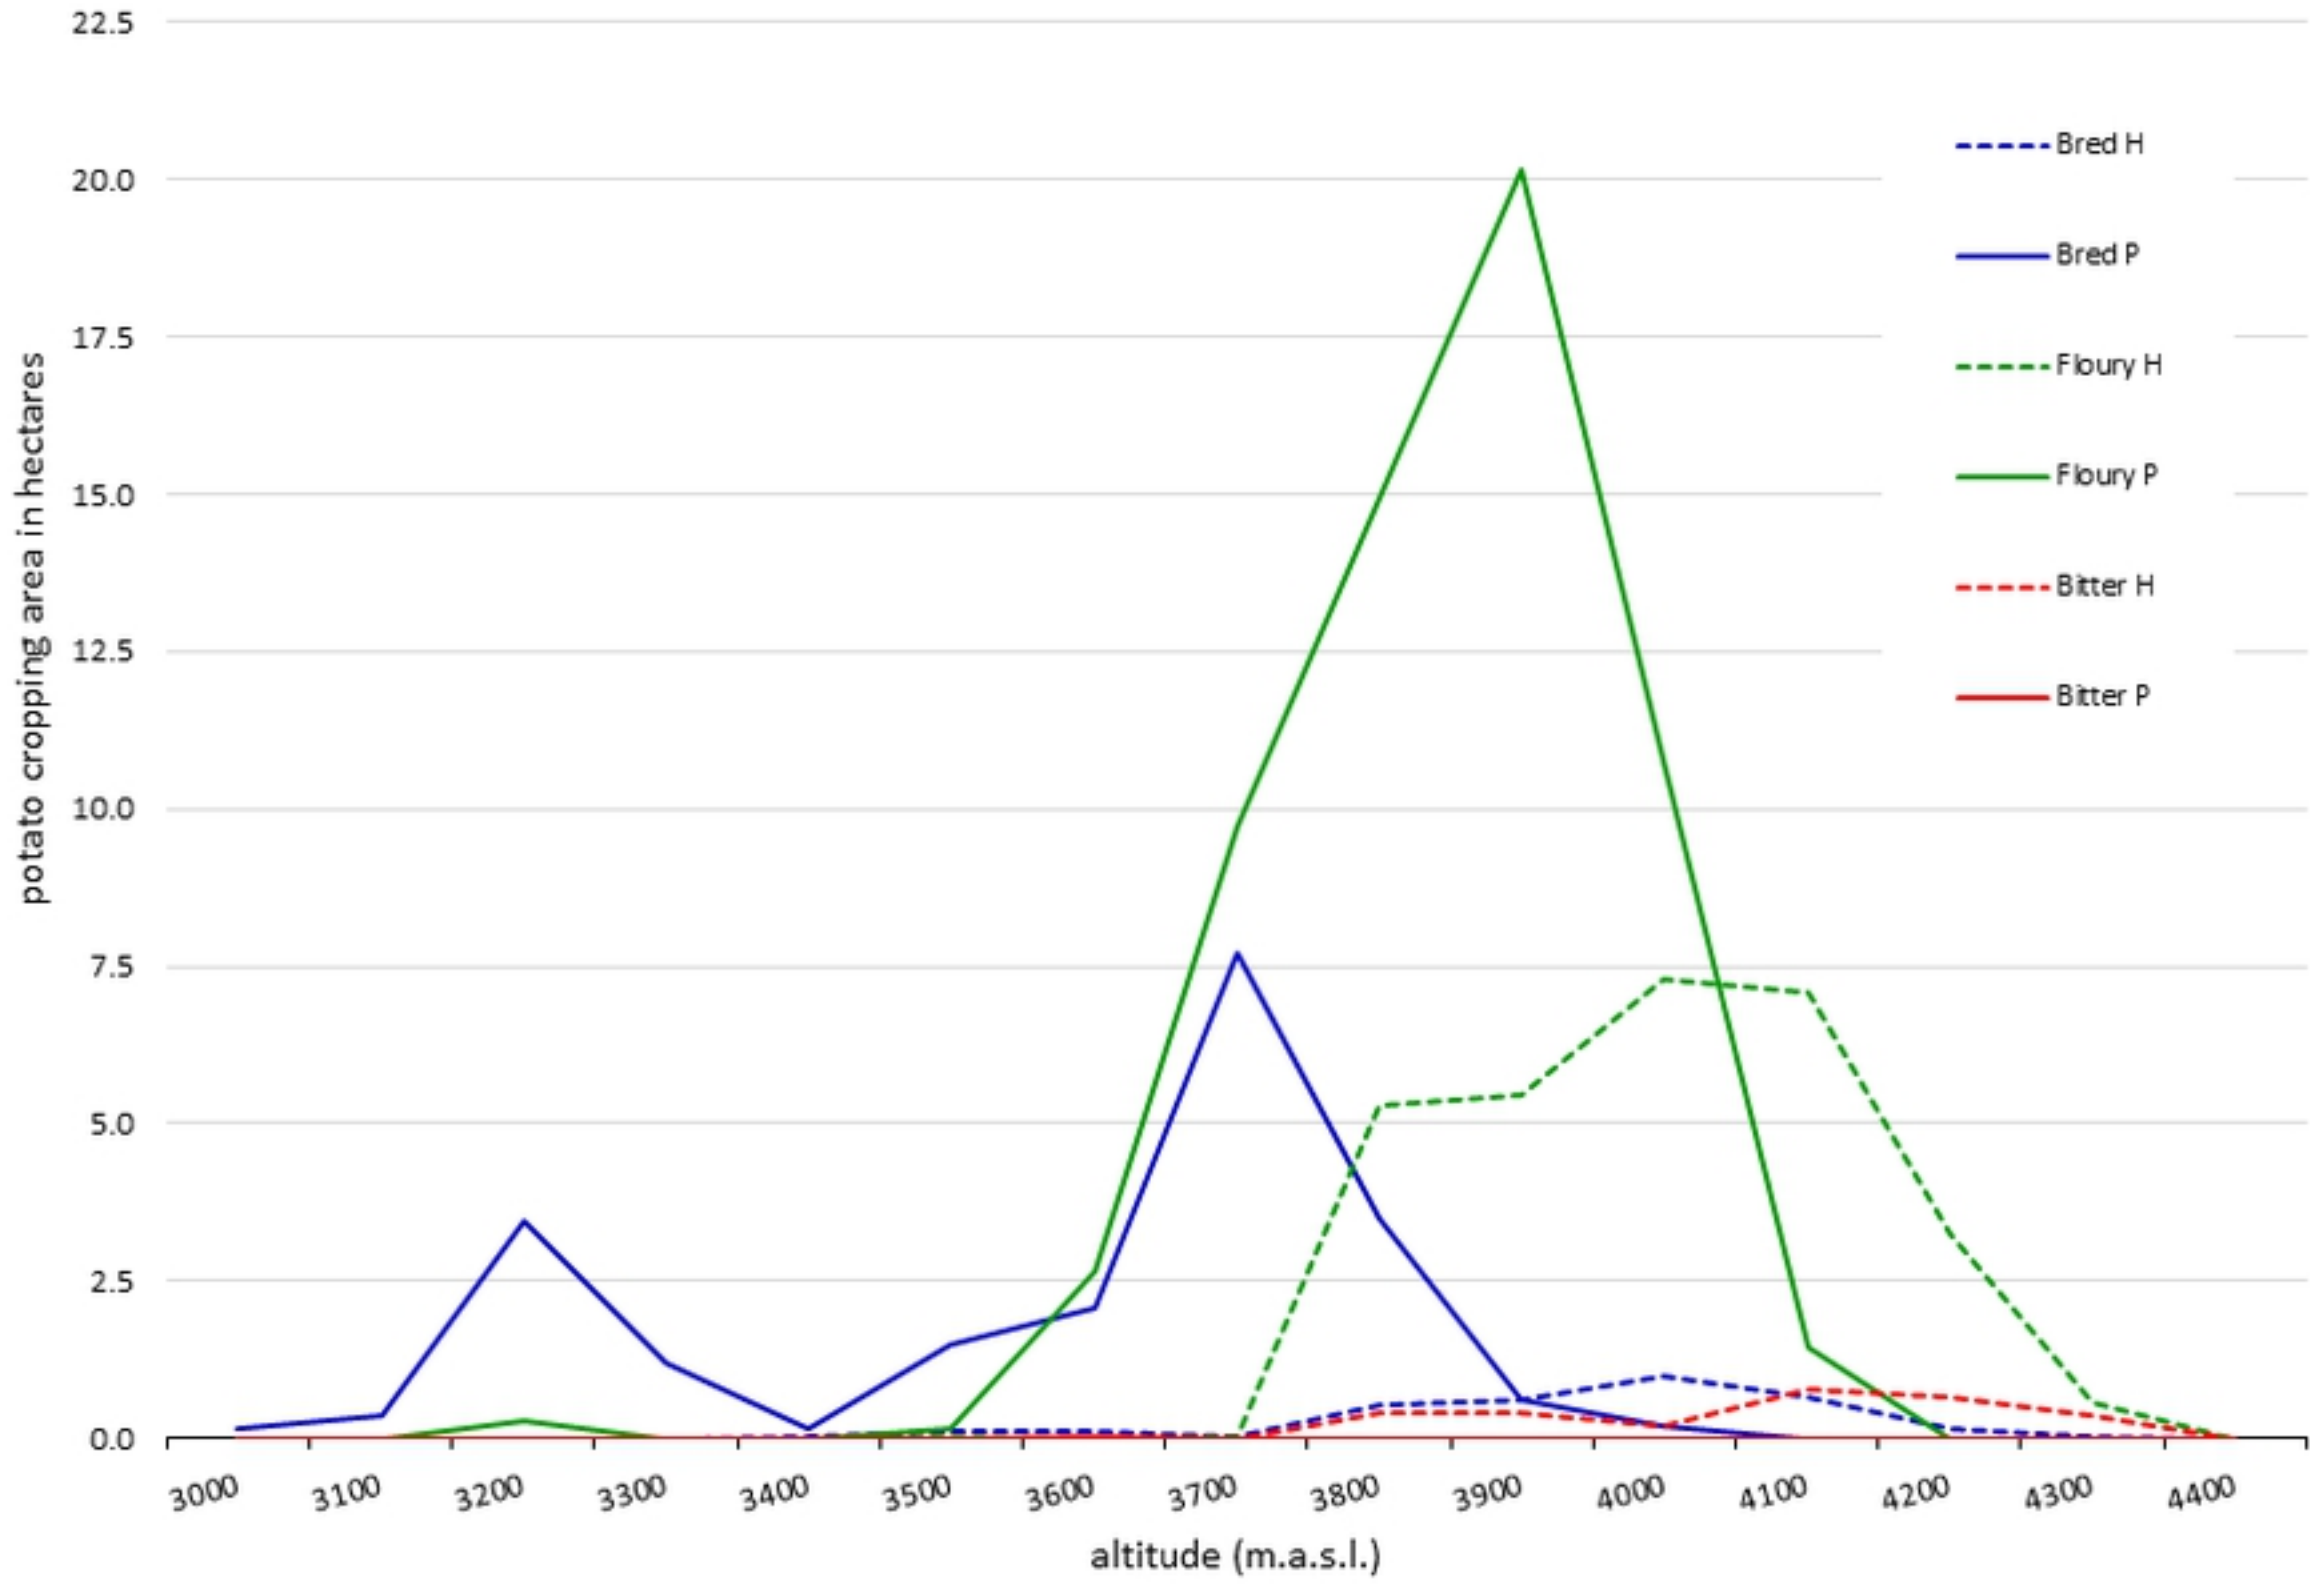

Figure 4





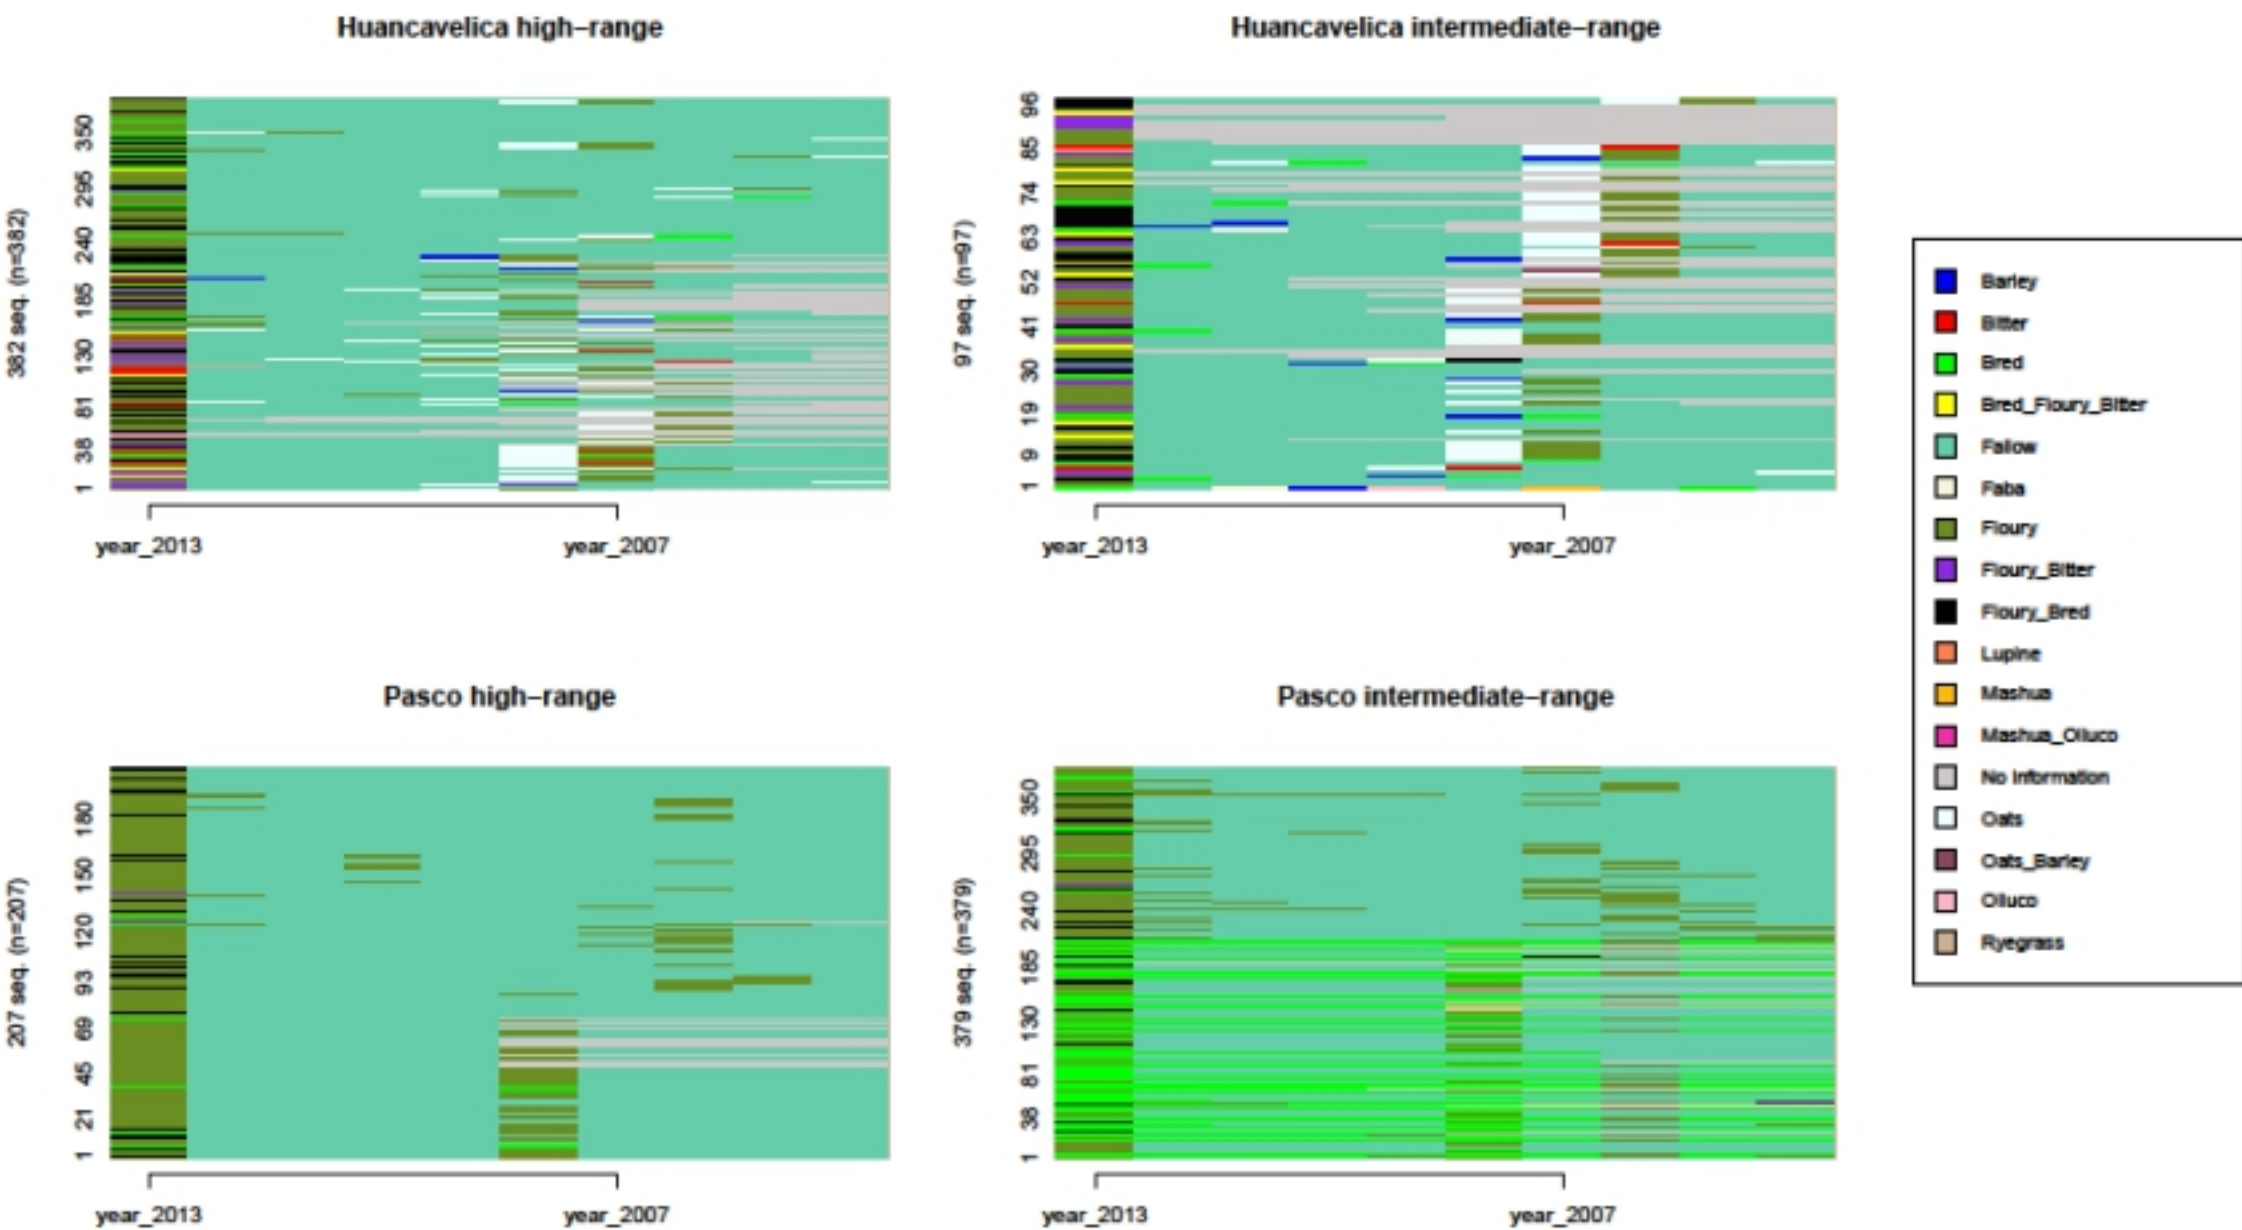

Figure 6

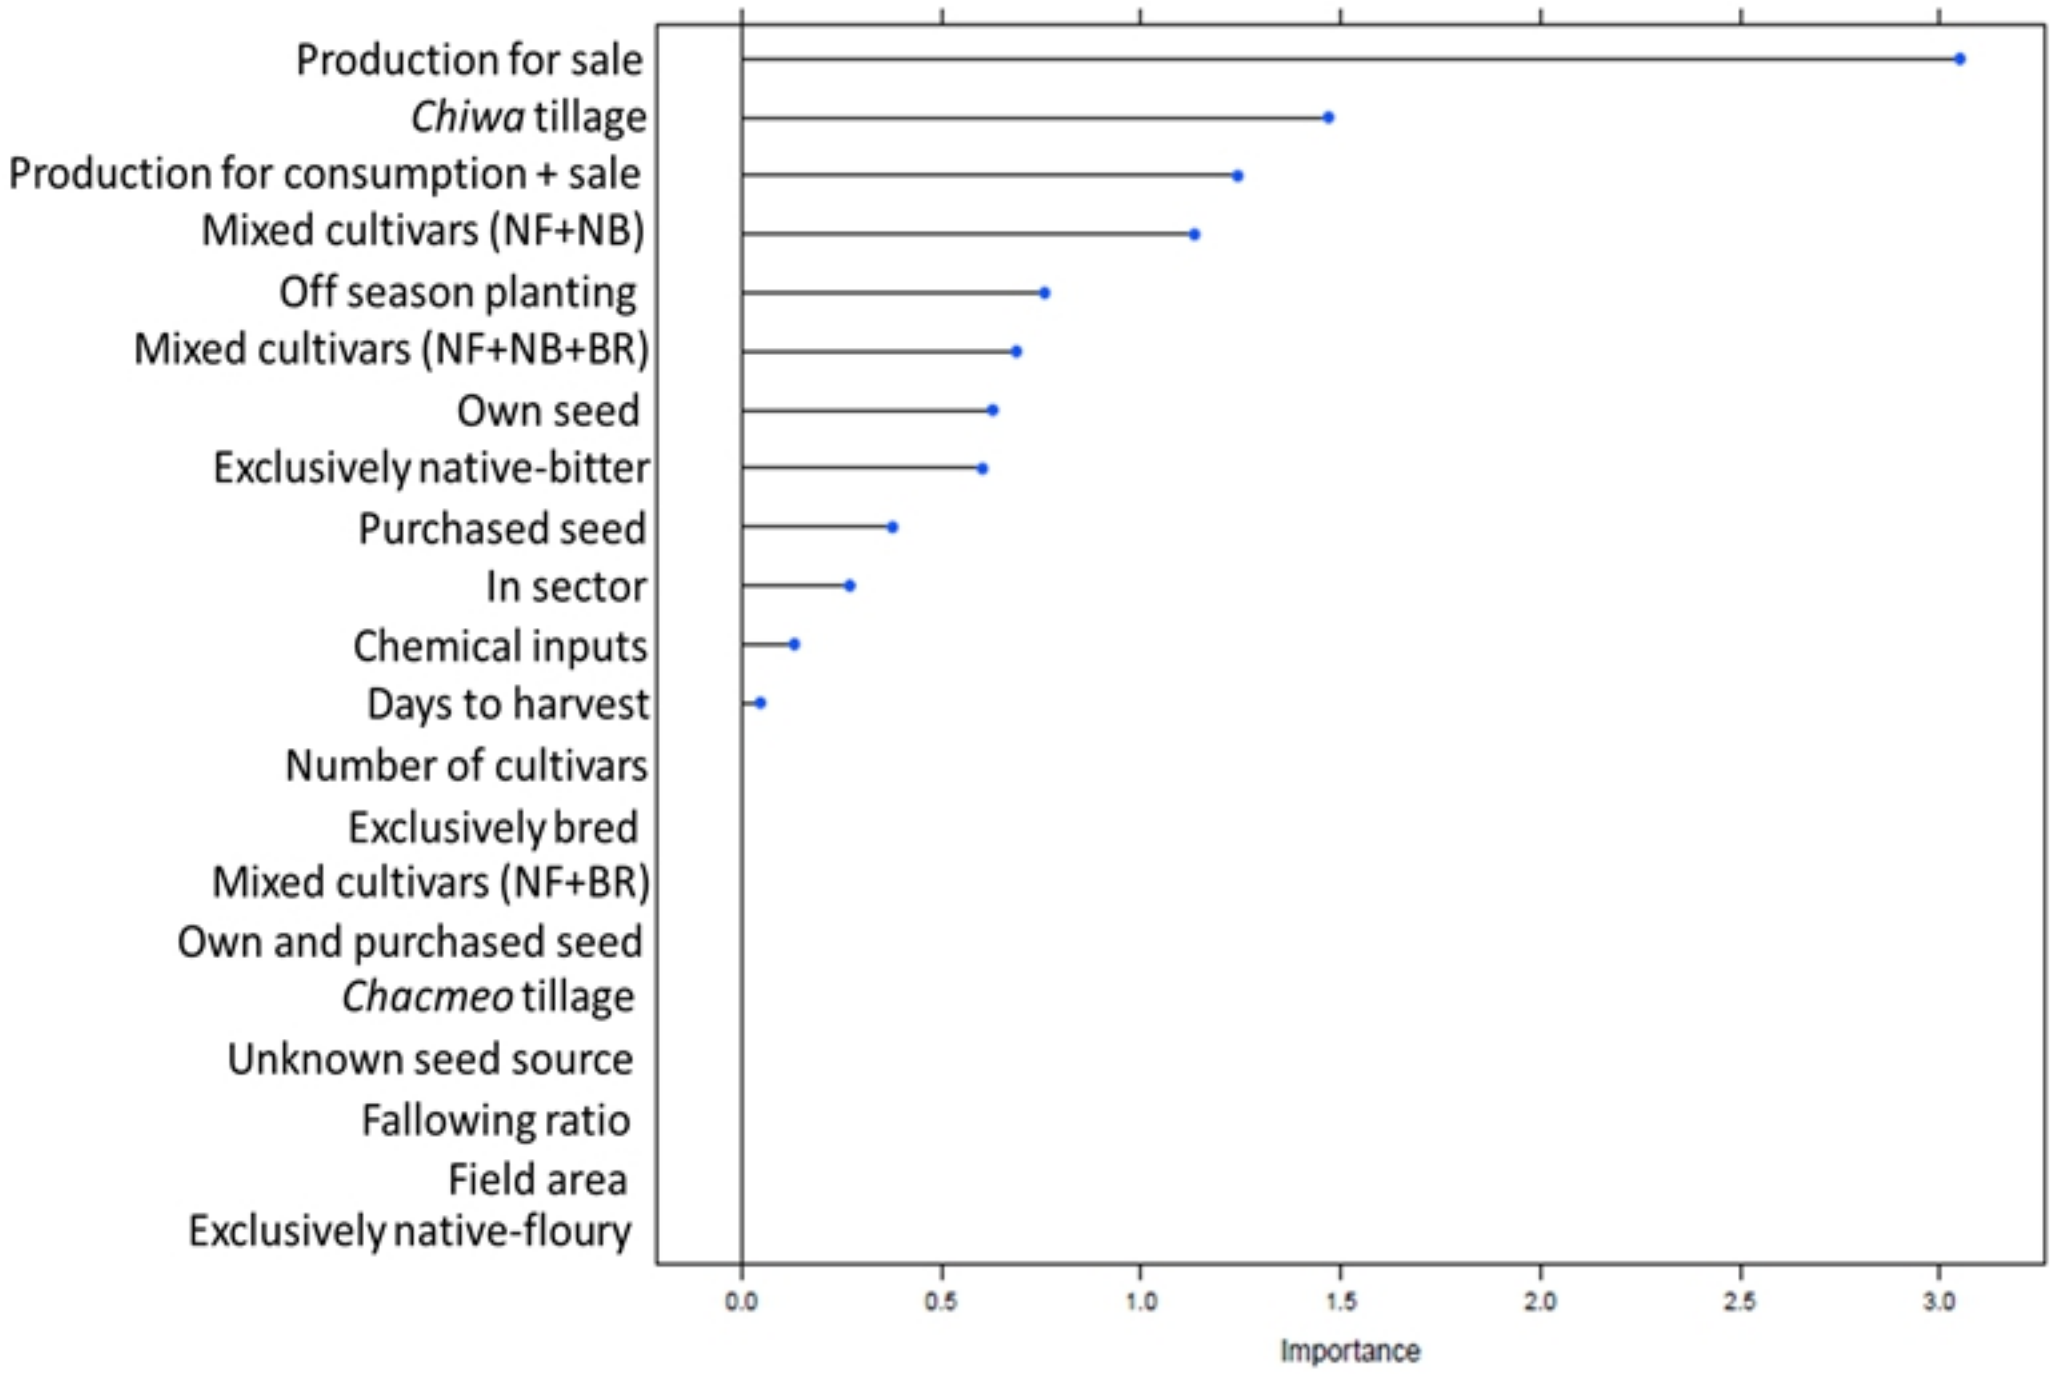

Figure 7A

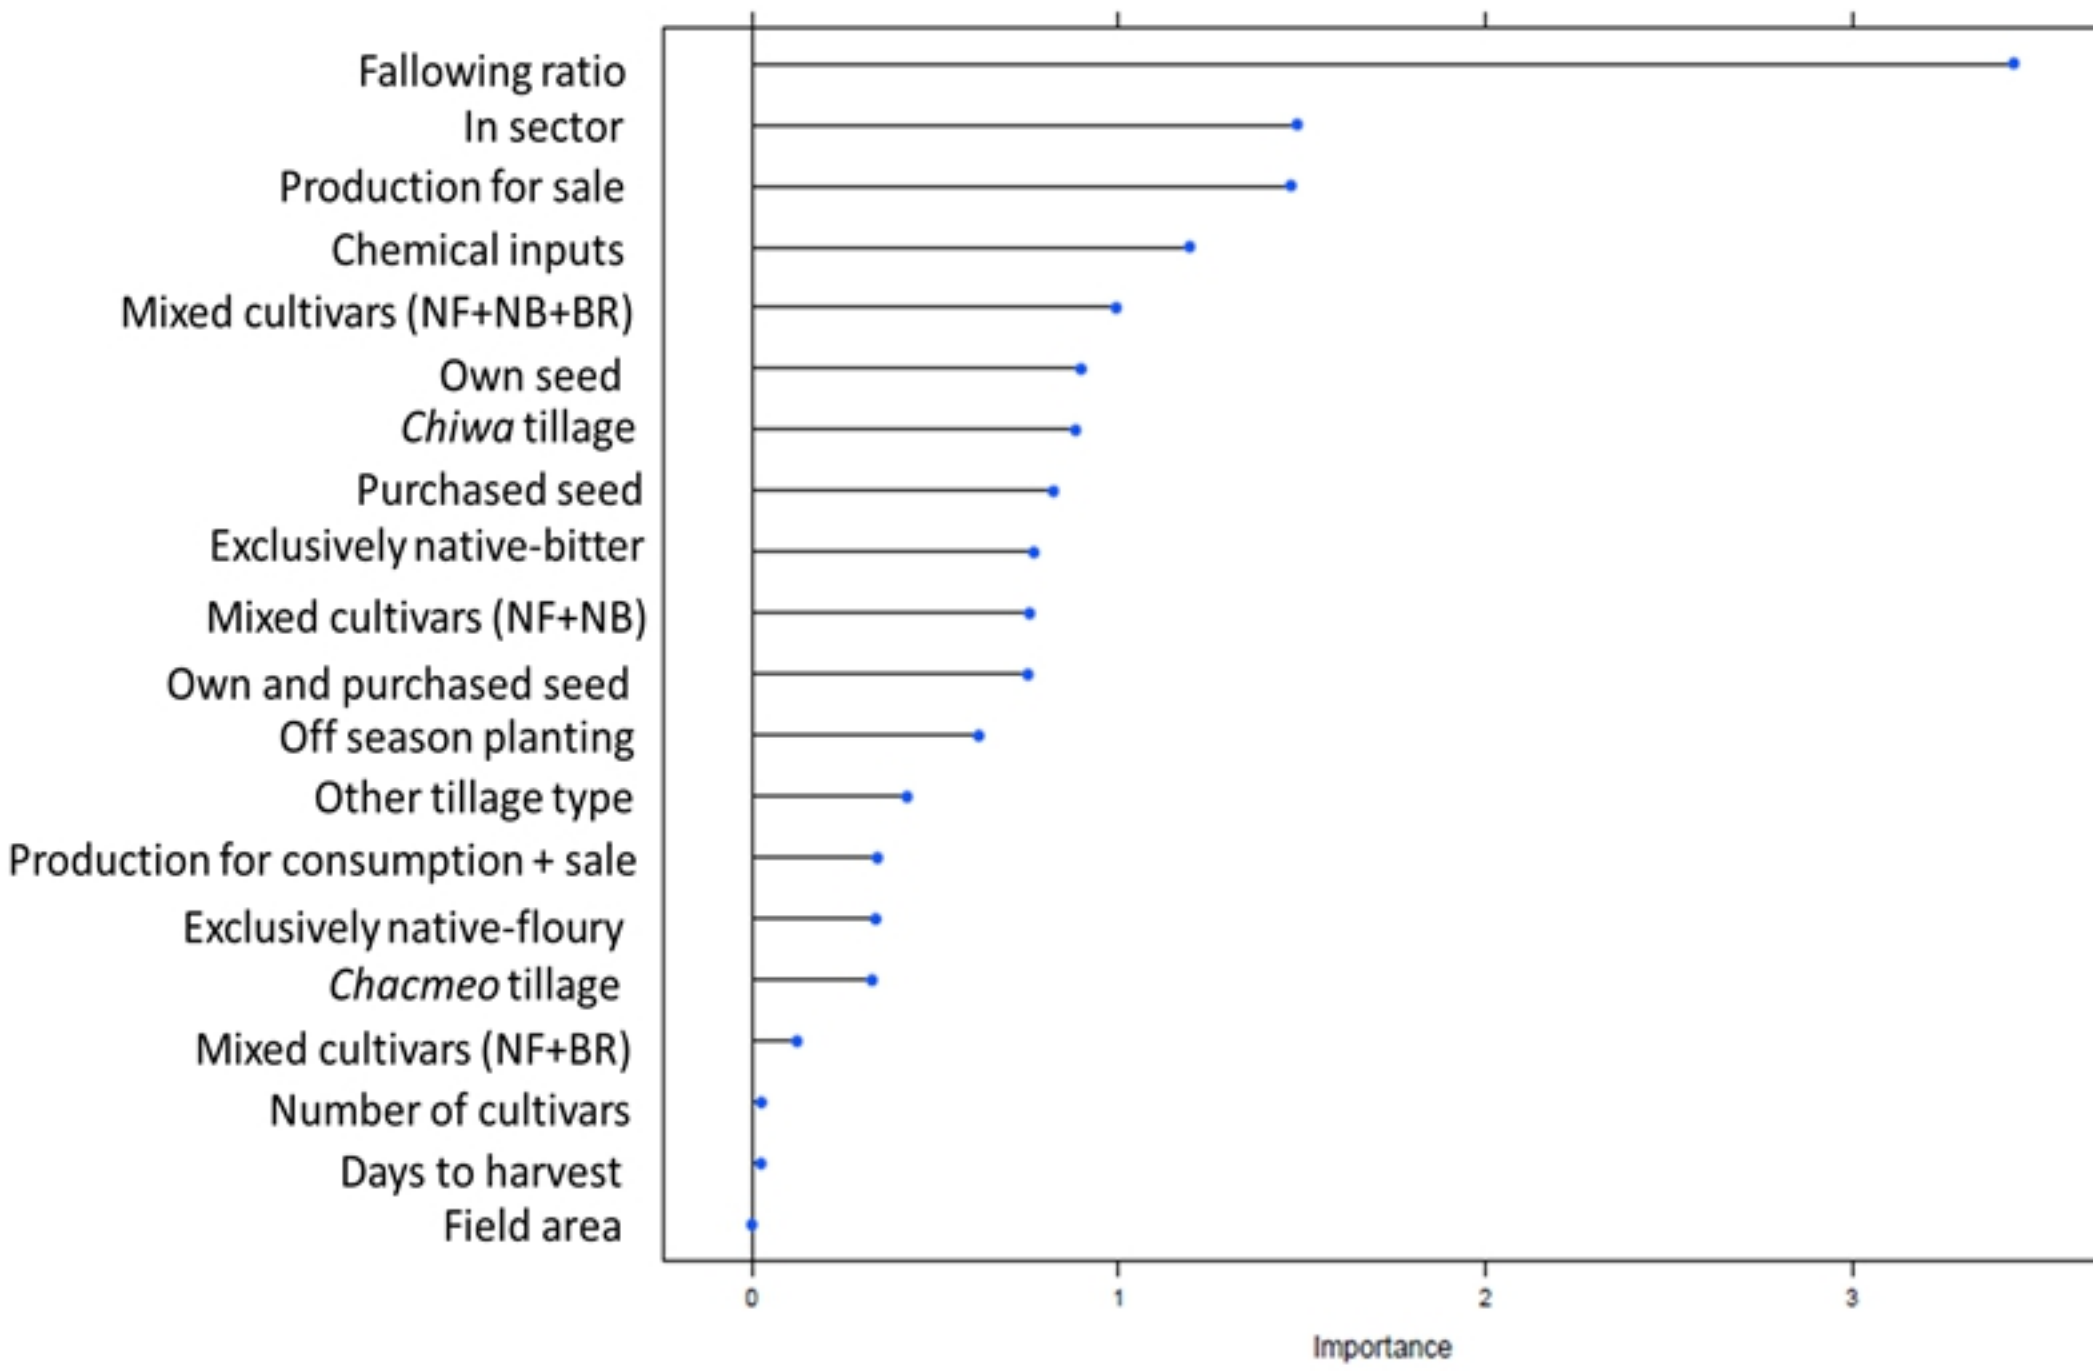

Figure 7B

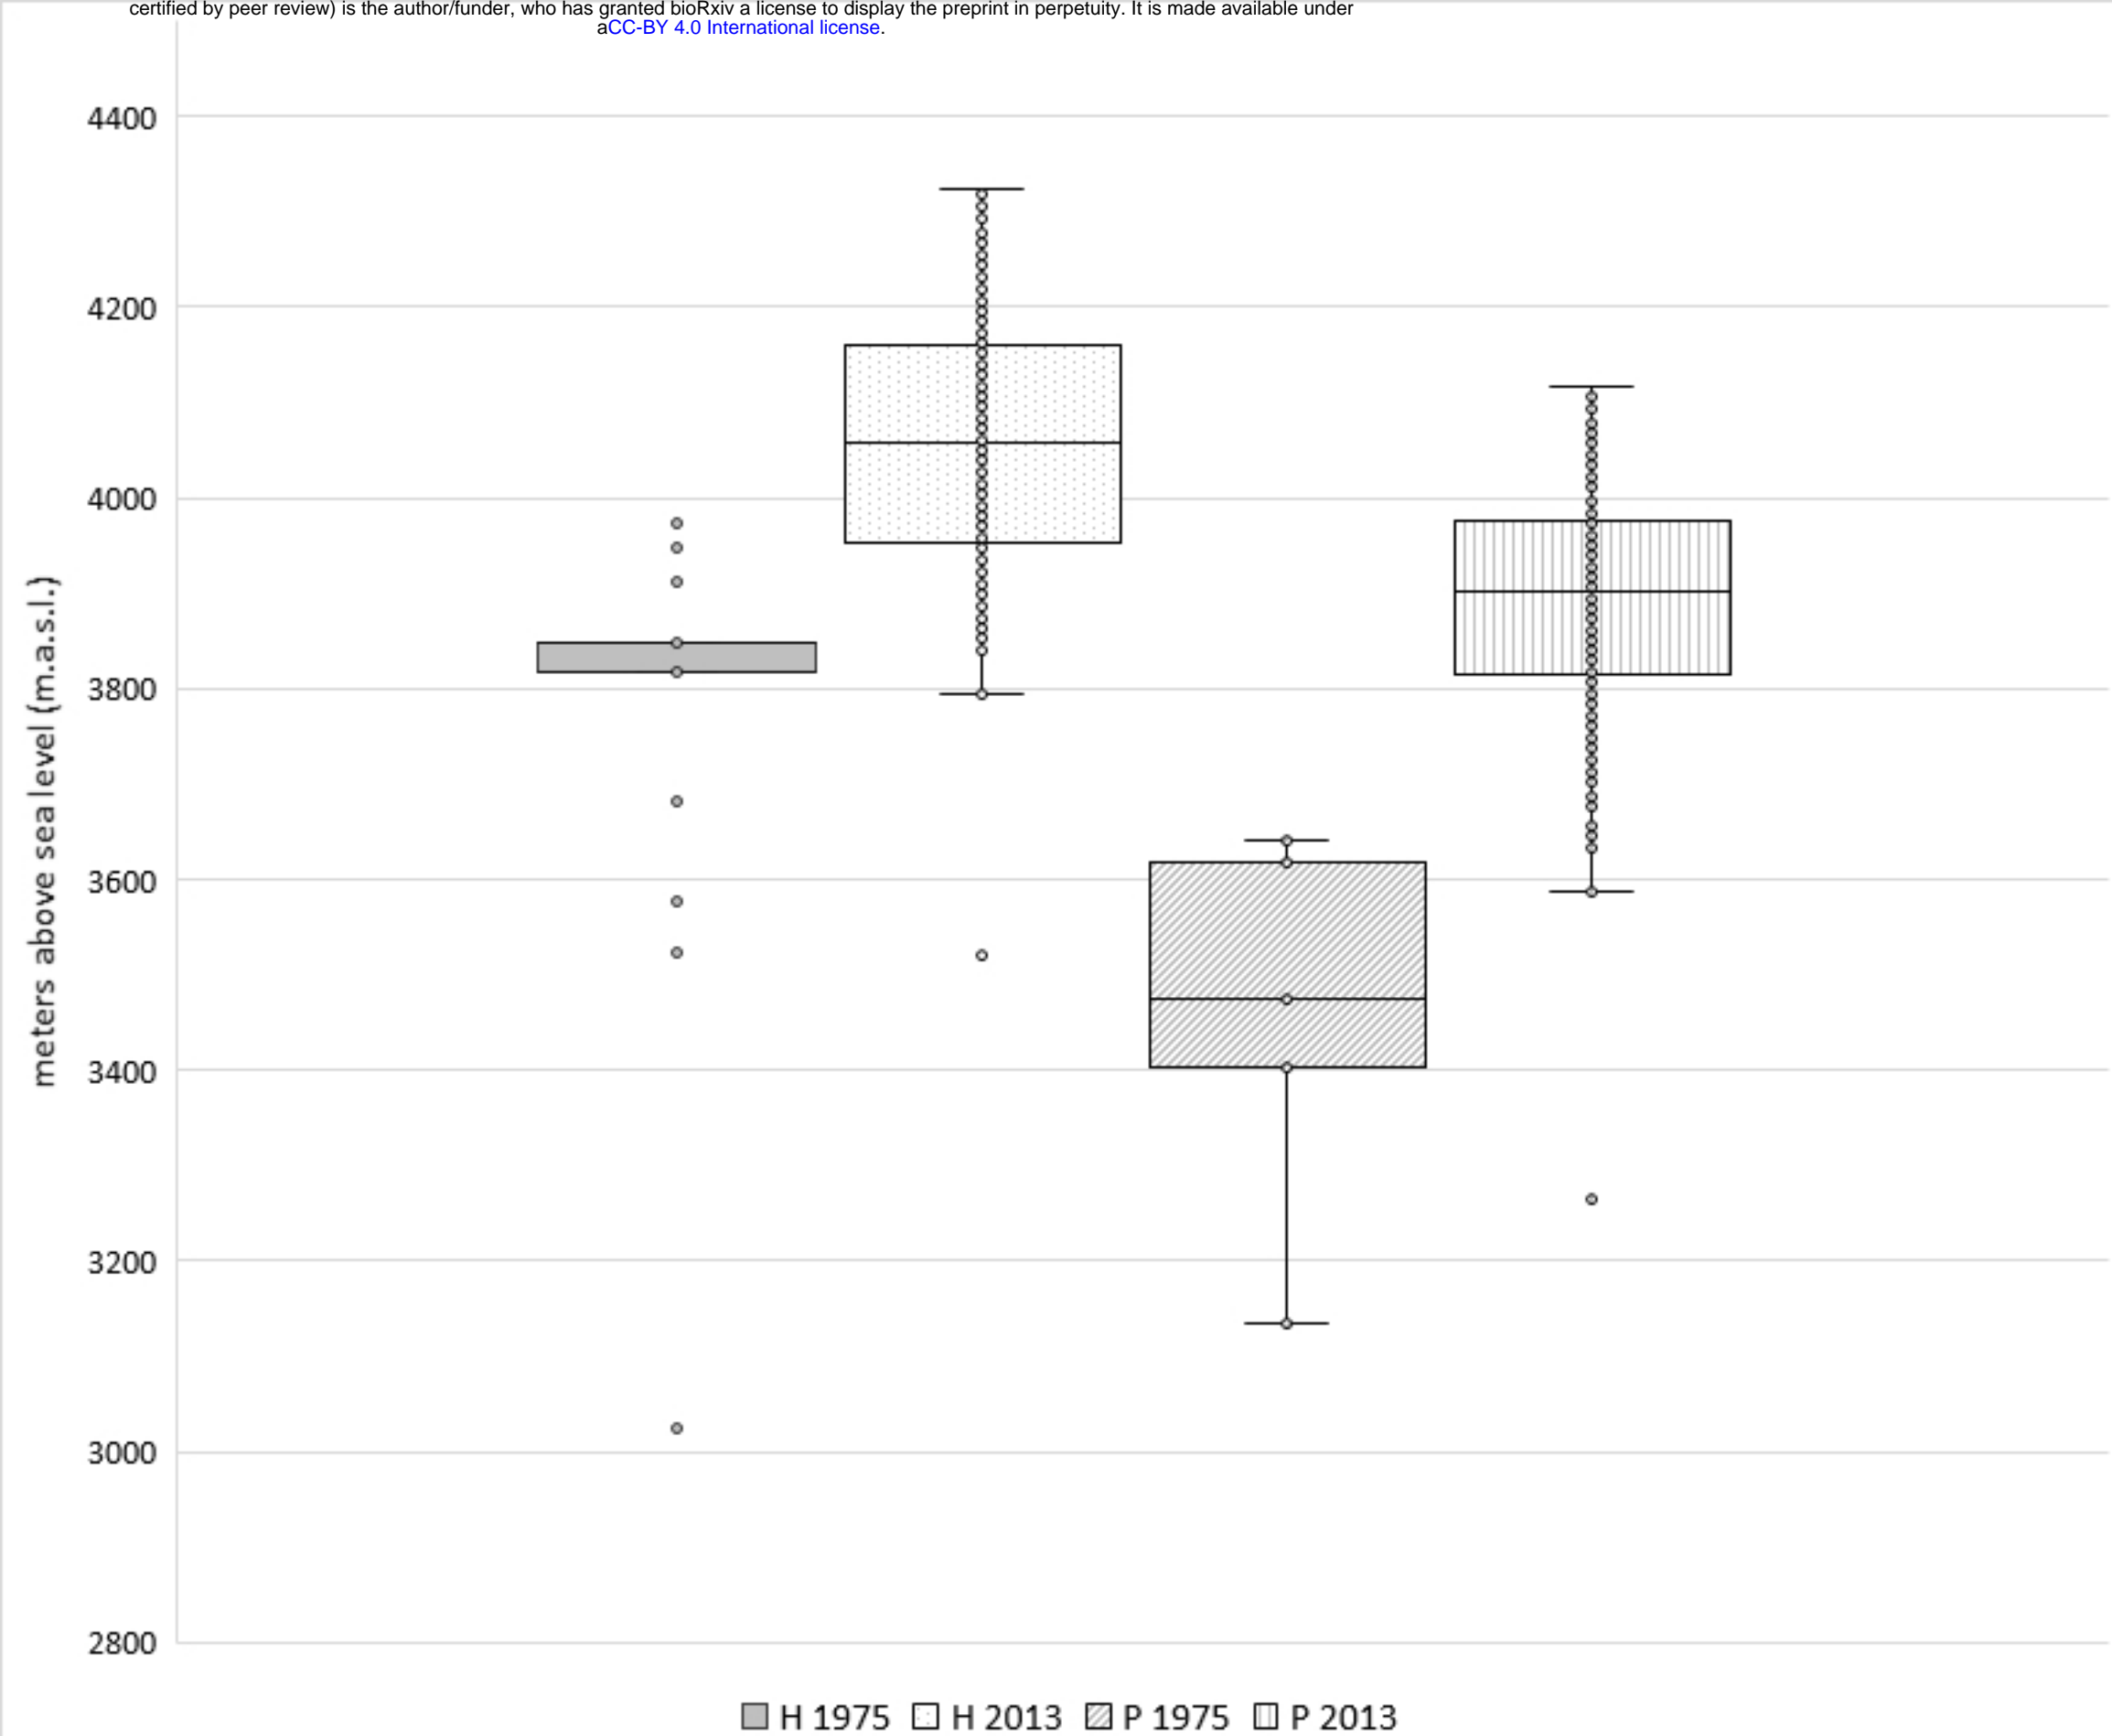

Figure 8

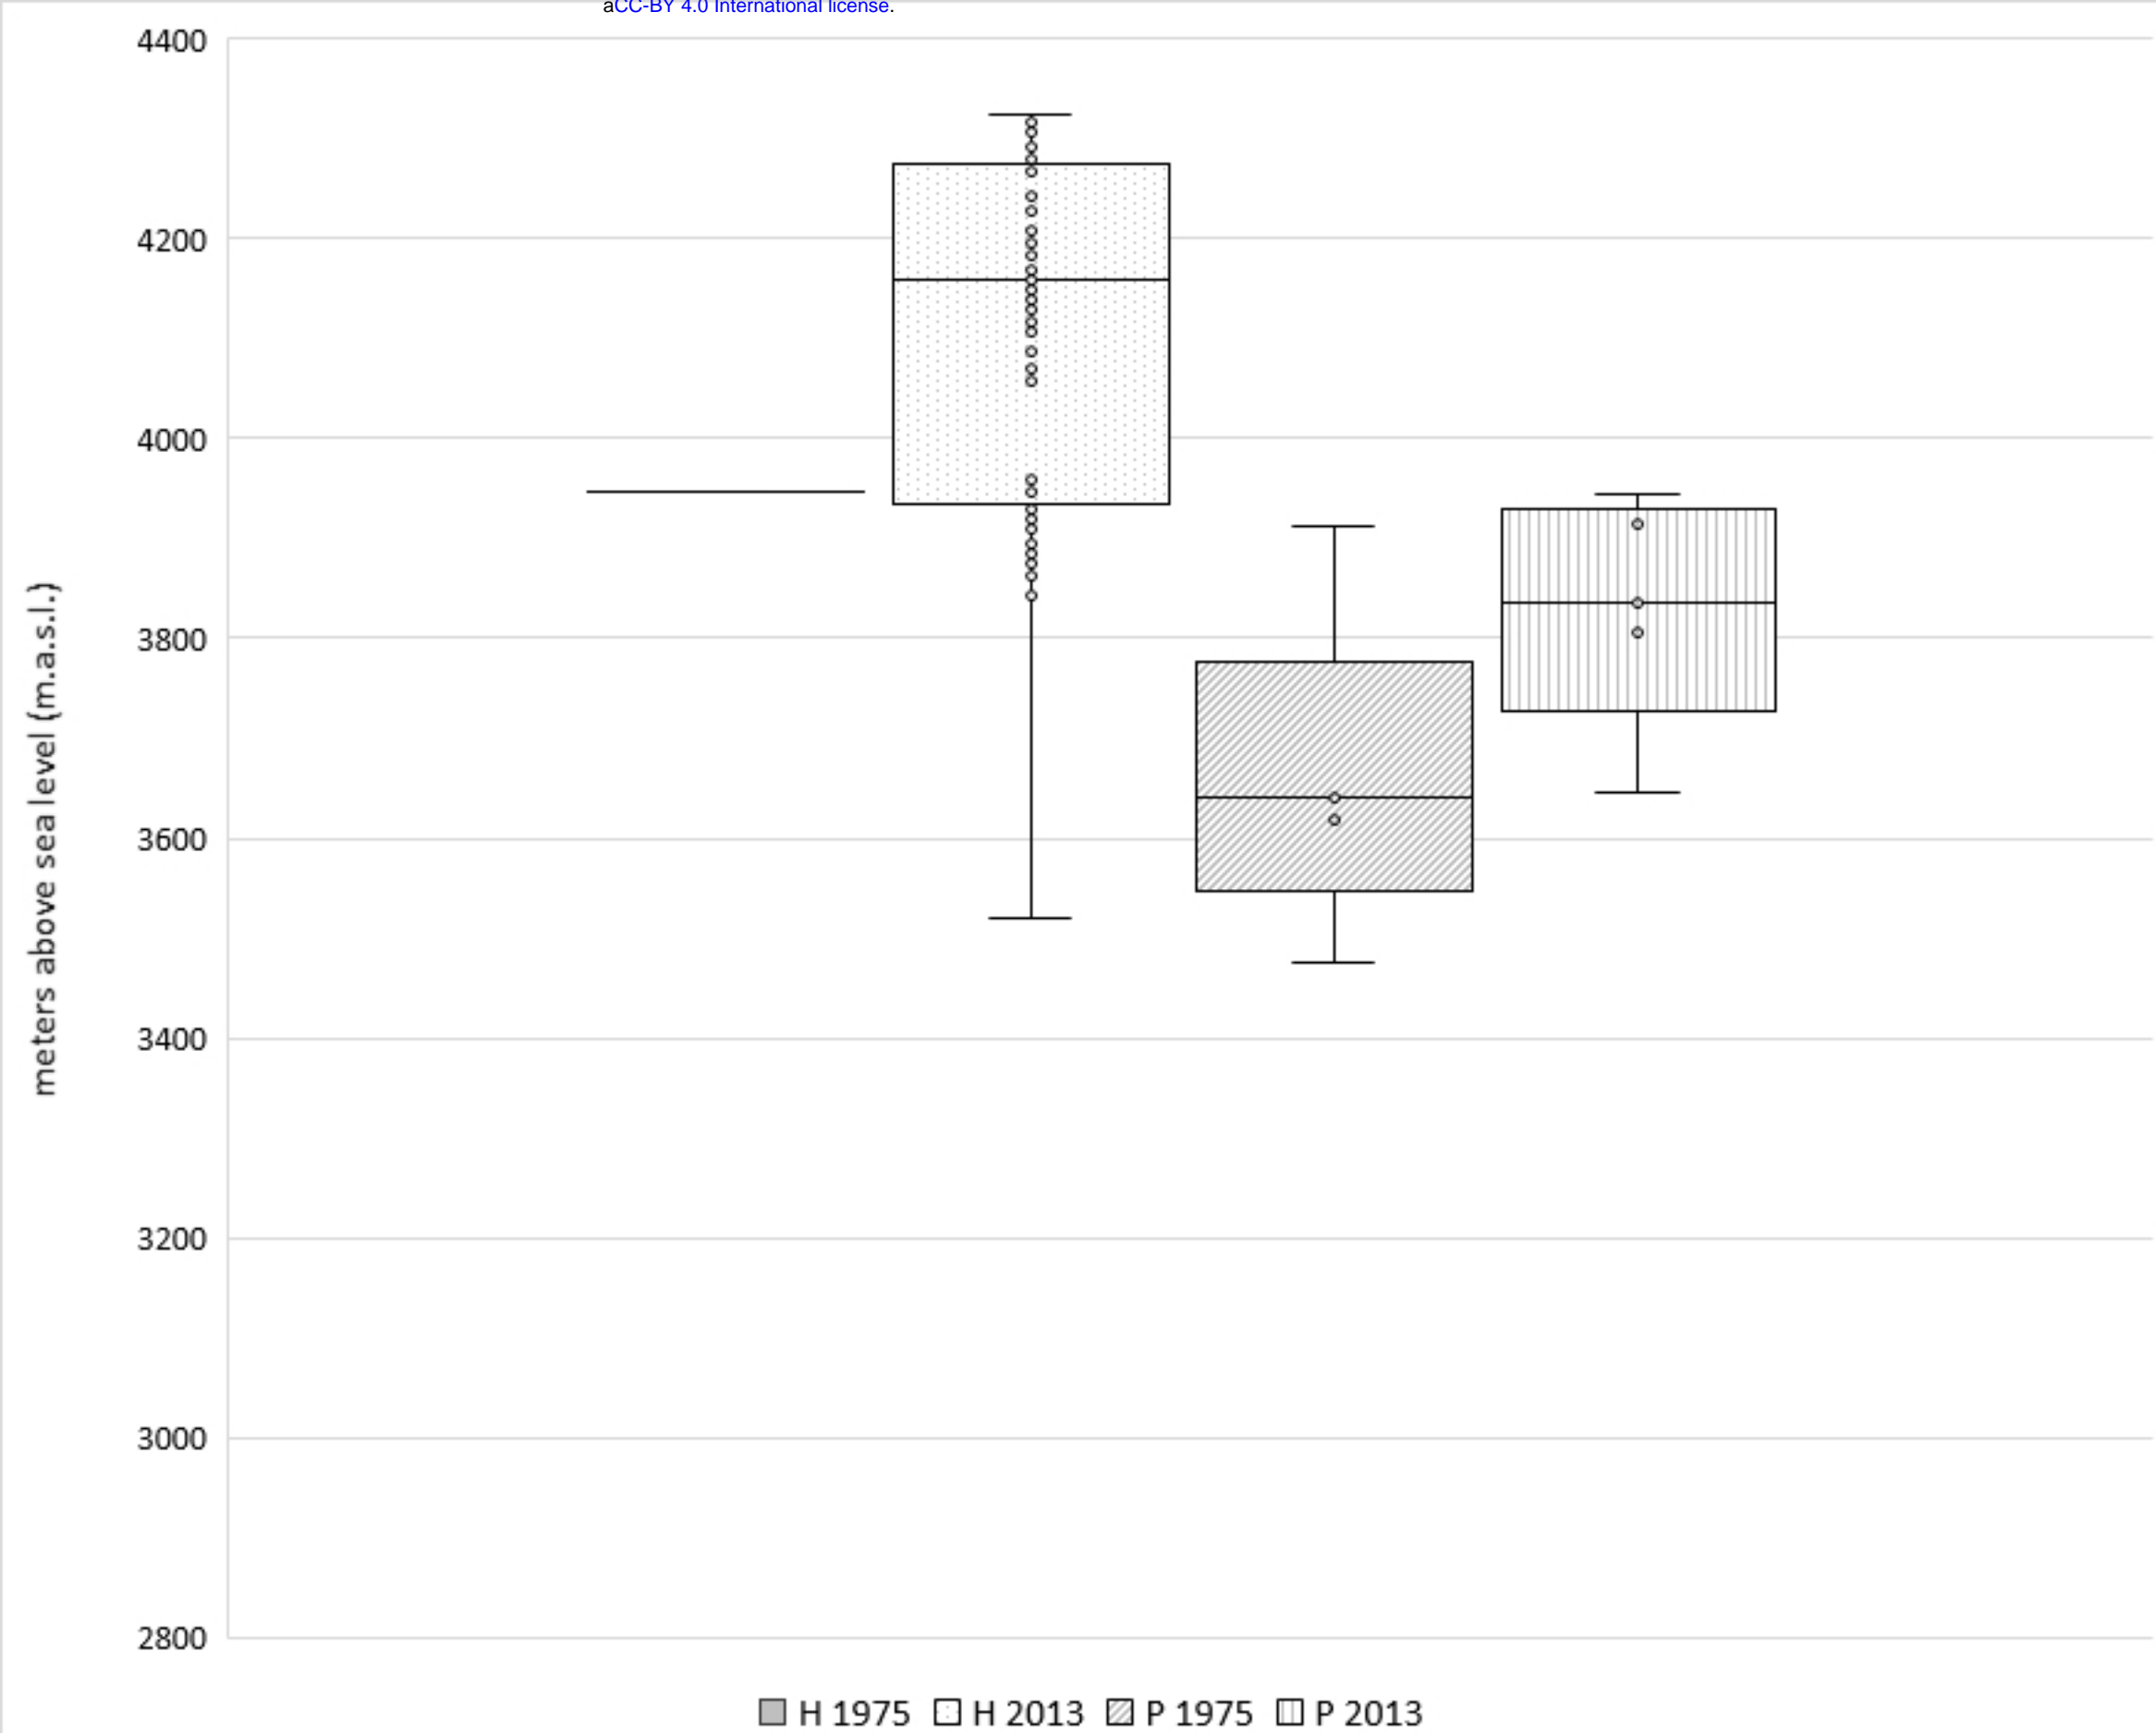

Figure 9
